# Supplementary material for: Irreproducible results and unsupported conclusions in Ahmad et al. [BMC genomics (2020) 21:656]
Source: PubMed Central journal article supplement (PMC10726643; doi:10.1186/s12864-023-09883-4), 2023-12-18

# XM\_007234505.3\_sacsin\_molecular\_chaperone\_(sacs)

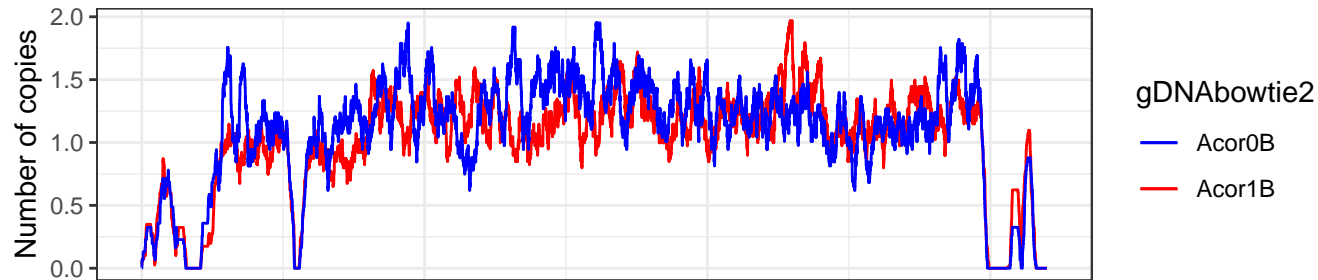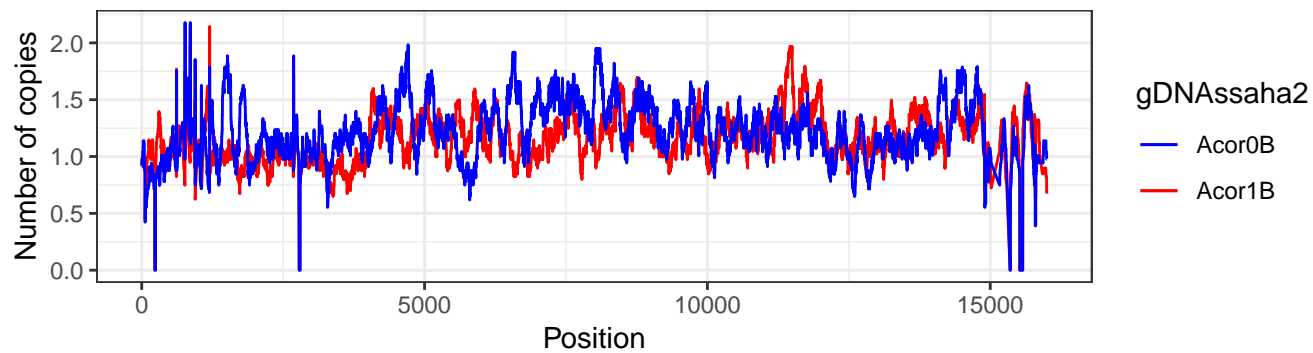

# XM\_007240217.3\_NADH:ubiquinone\_oxidoreductase\_subunit\_A11\_(ndufa11)

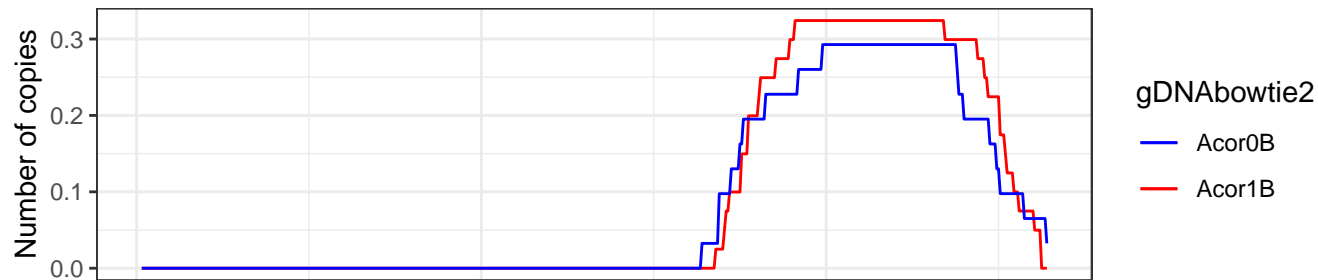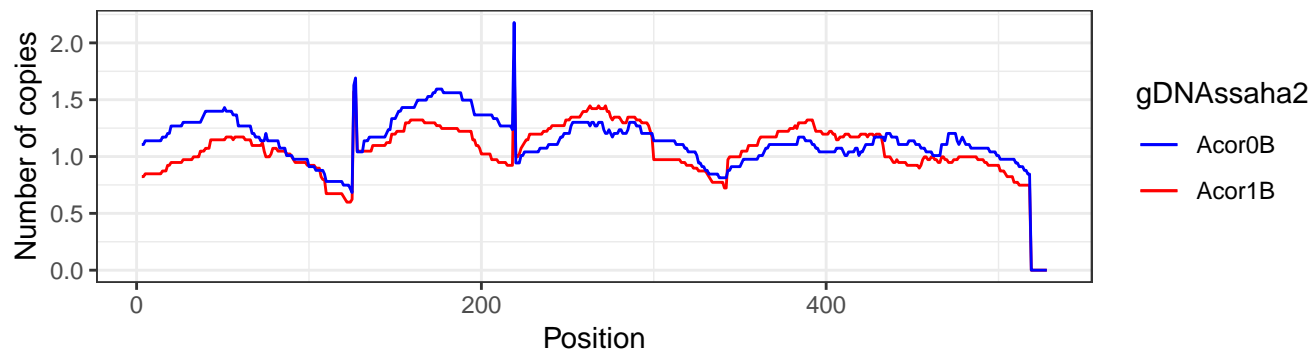

# XM\_022667990.1\_RecQ\_like\_helicase\_4\_(recql4)

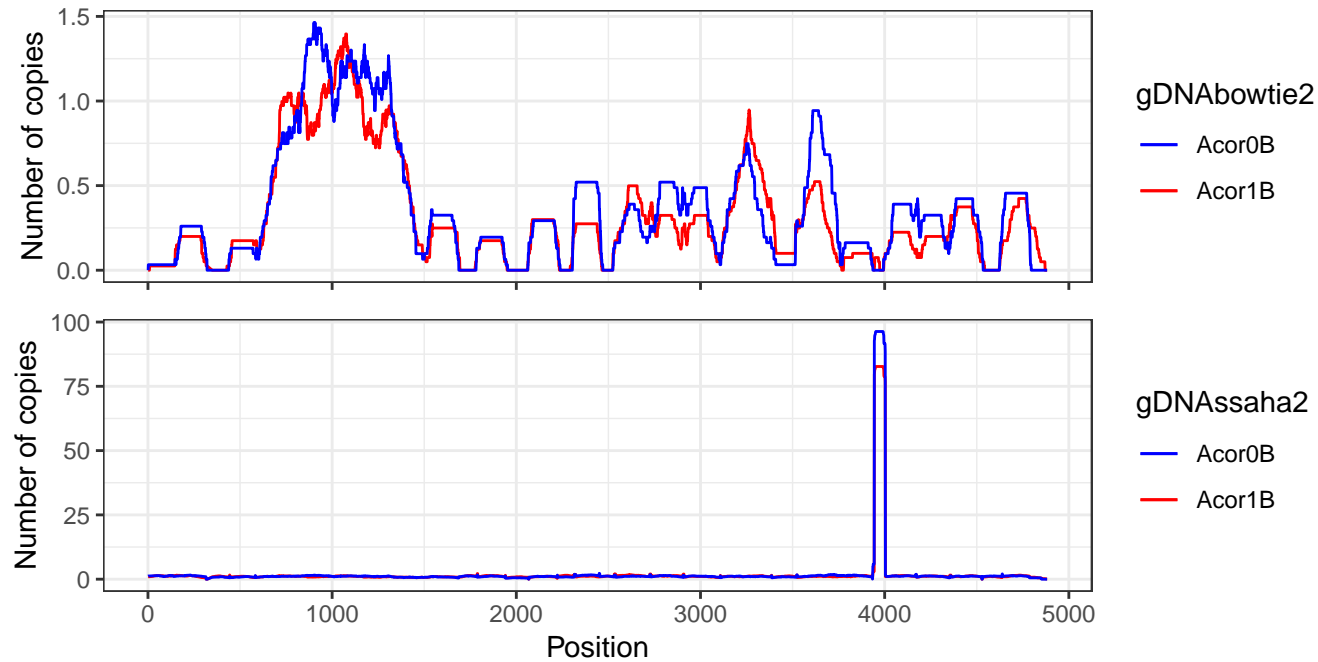

# XM\_022673973.1\_syntrophin\_beta\_1\_(sntb1)

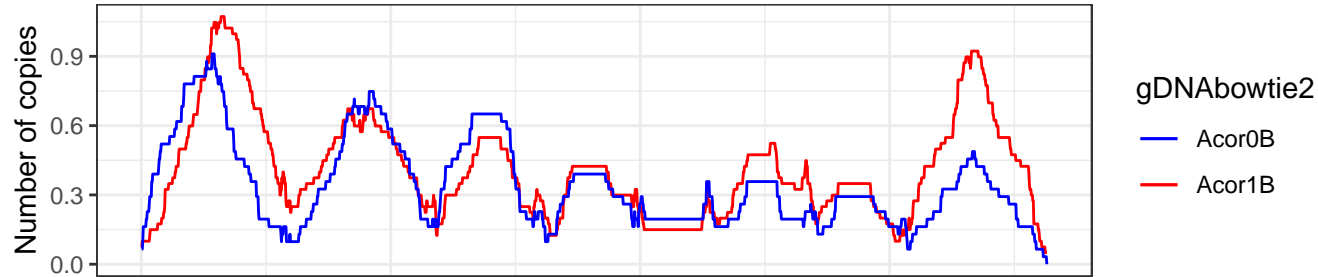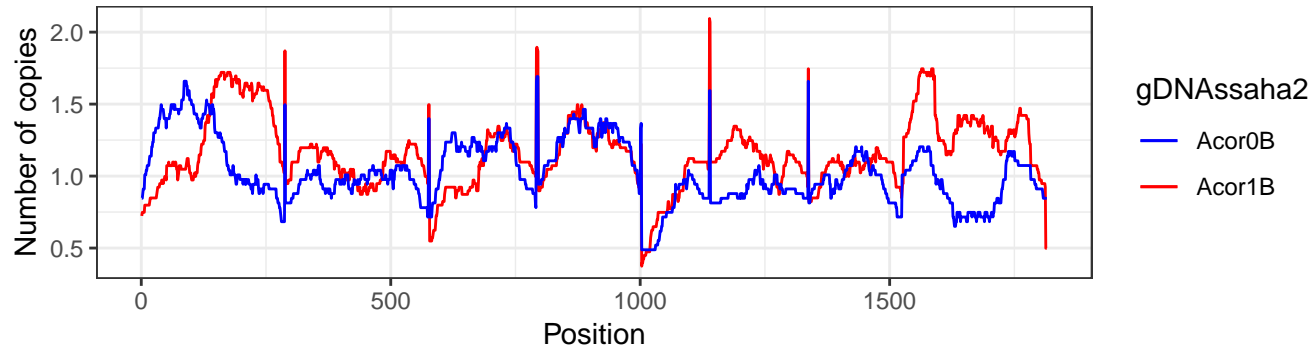

# XM\_007241992.3\_solute\_carrier\_family\_16\_member\_13\_(slc16a13)

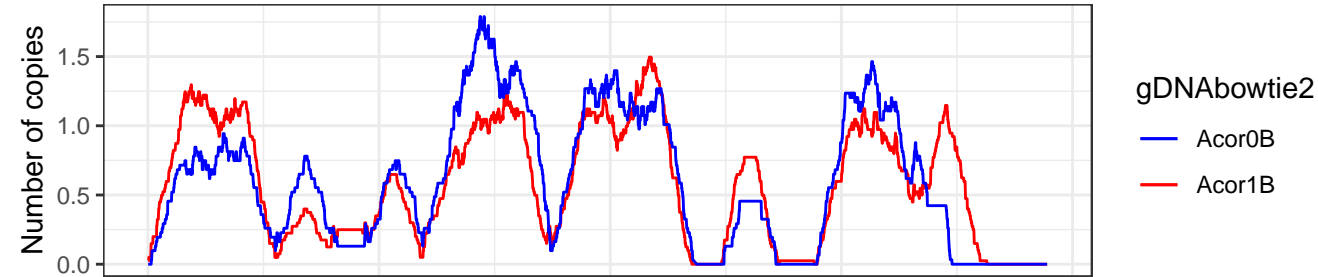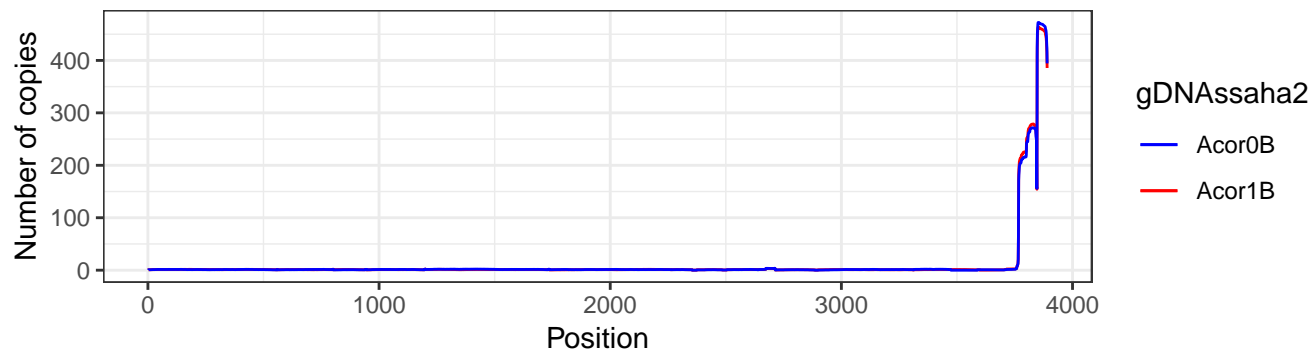

# XM\_015608019.2\_cyclin\_dependent\_kinase\_12\_(cdk12)

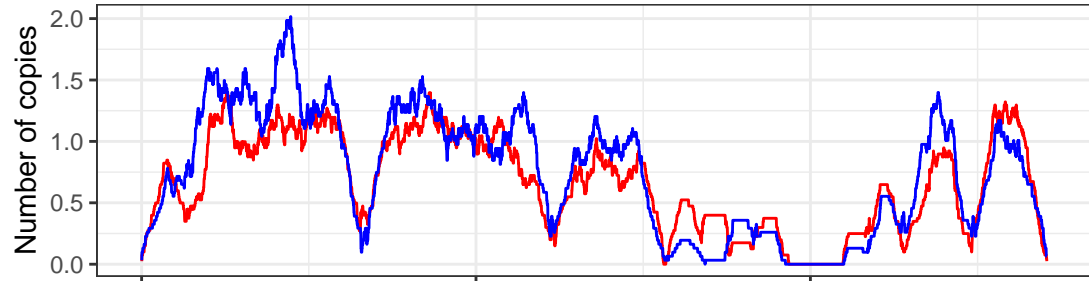

gDNA bowtie2

— Acor0B

— Acor1B

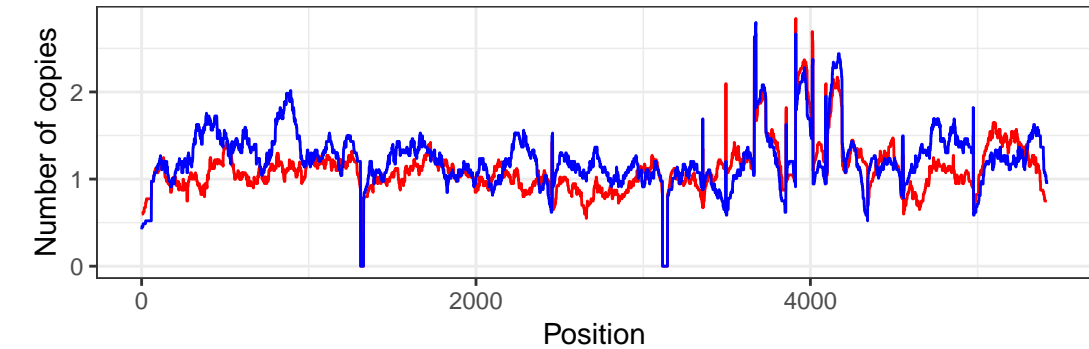

gDNA Assaha2

— Acor0B

— Acor1B

# XM\_015602285.2\_sperm\_associated\_antigen\_8\_(spag8)

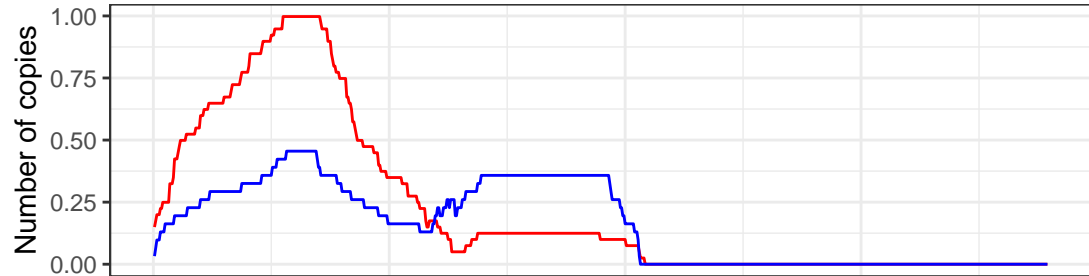

gDNA bowtie2

Acor0B

Acor1B

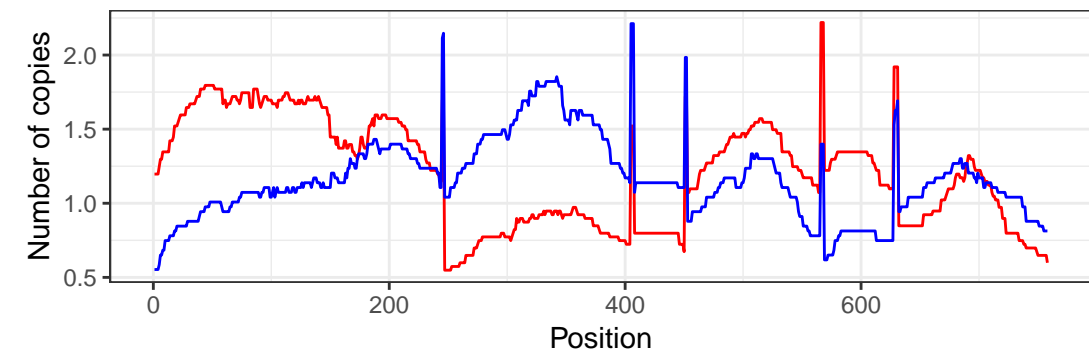

gDNA Assaha2

Acor0B

Acor1B

# XM\_022670444.1\_importin\_11\_(ipo11)

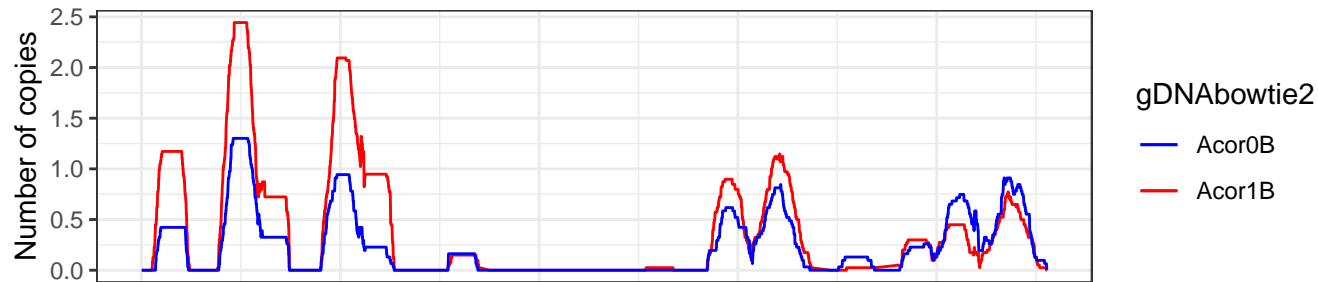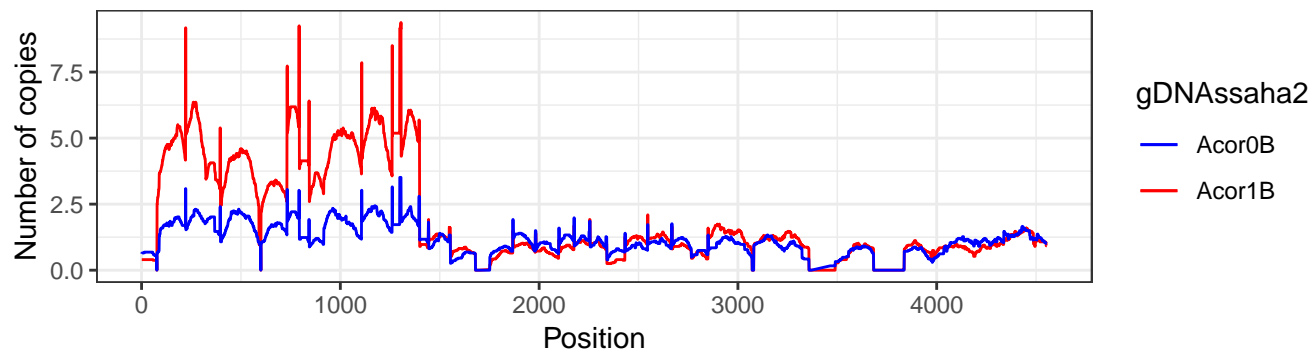



# XM\_015605096.2\_MACRO\_domain\_containing\_1\_(macro1)

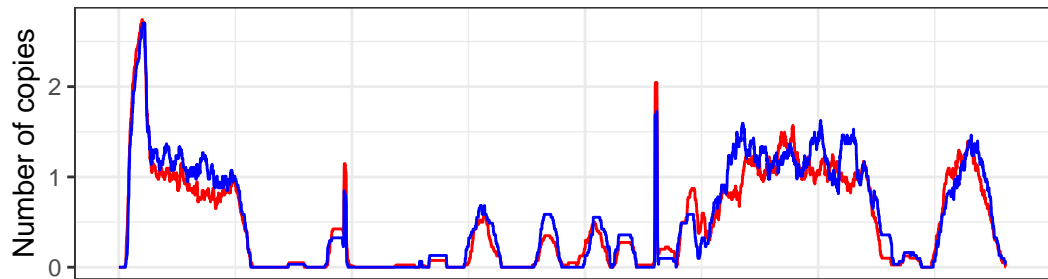

gDNAbowtie2

Acor0B

Acor1B

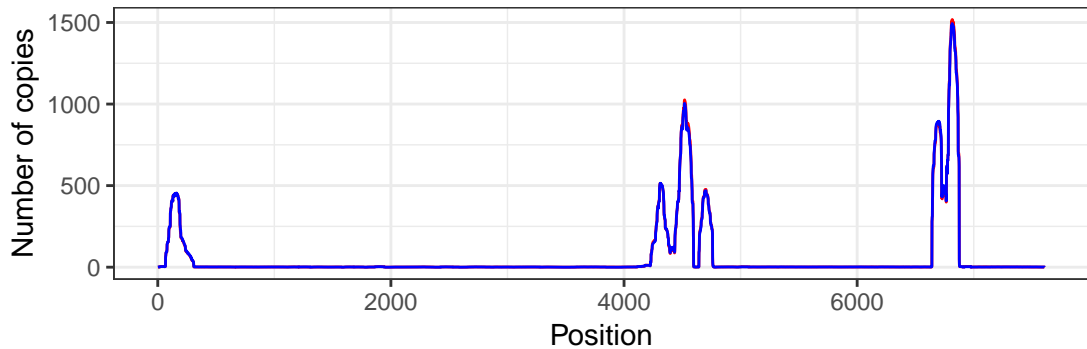

gDNAAssaha2

Acor0B

Acor1B

XM\_022679479.1\_leucine\_rich\_repeats\_and\_calponin\_homology\_domain\_conta

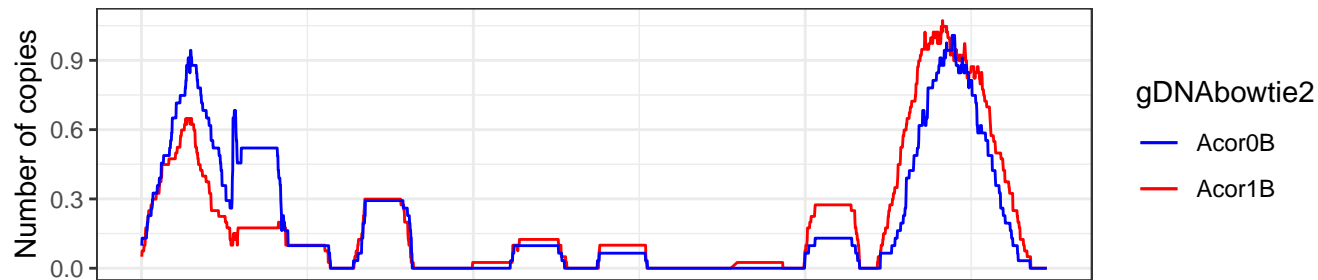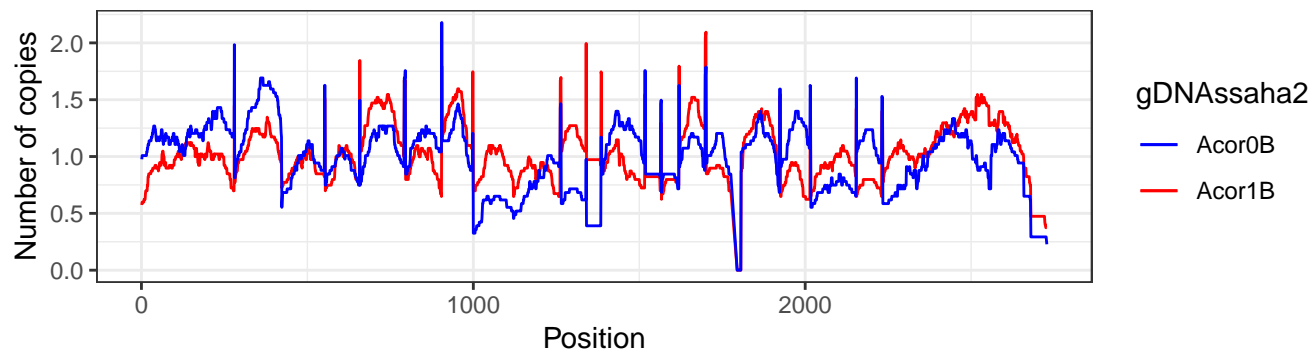

# XM\_007257545.3\_methyl-CpG\_binding\_domain\_protein\_5\_(mbd5)

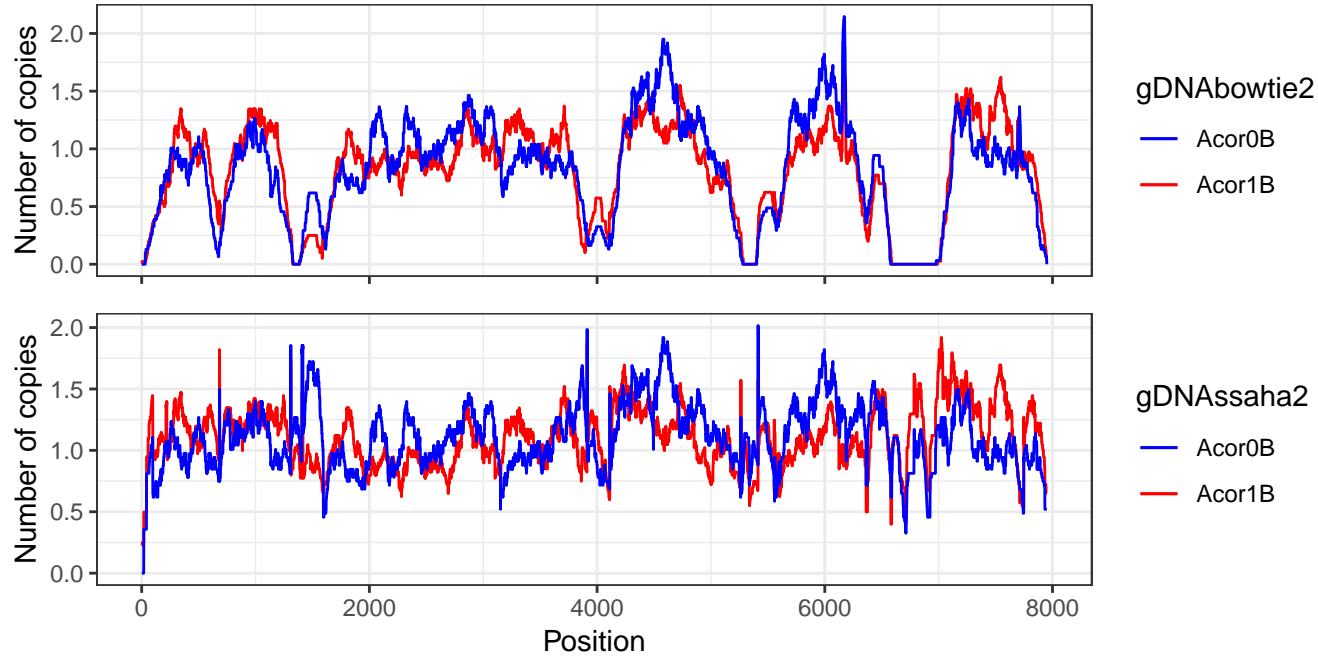

# XM\_007245281.3\_double\_C2\_domain\_beta\_(doc2b)

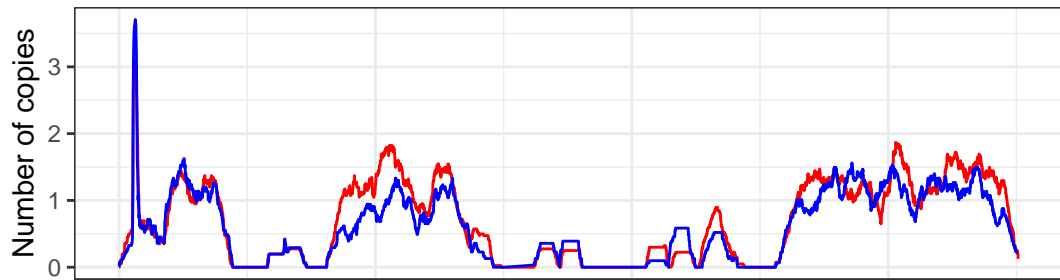

gDNAbowtie2

— Acor0B

— Acor1B

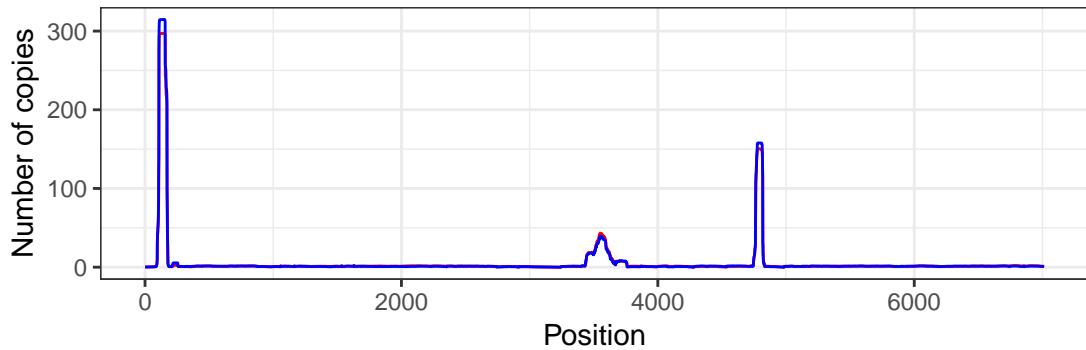

gDNAAssaha2

— Acor0B

— Acor1B

# XM\_022663733.1\_connector\_enhancer\_of\_kinase\_suppressor\_of\_Ras\_1\_(cnksr

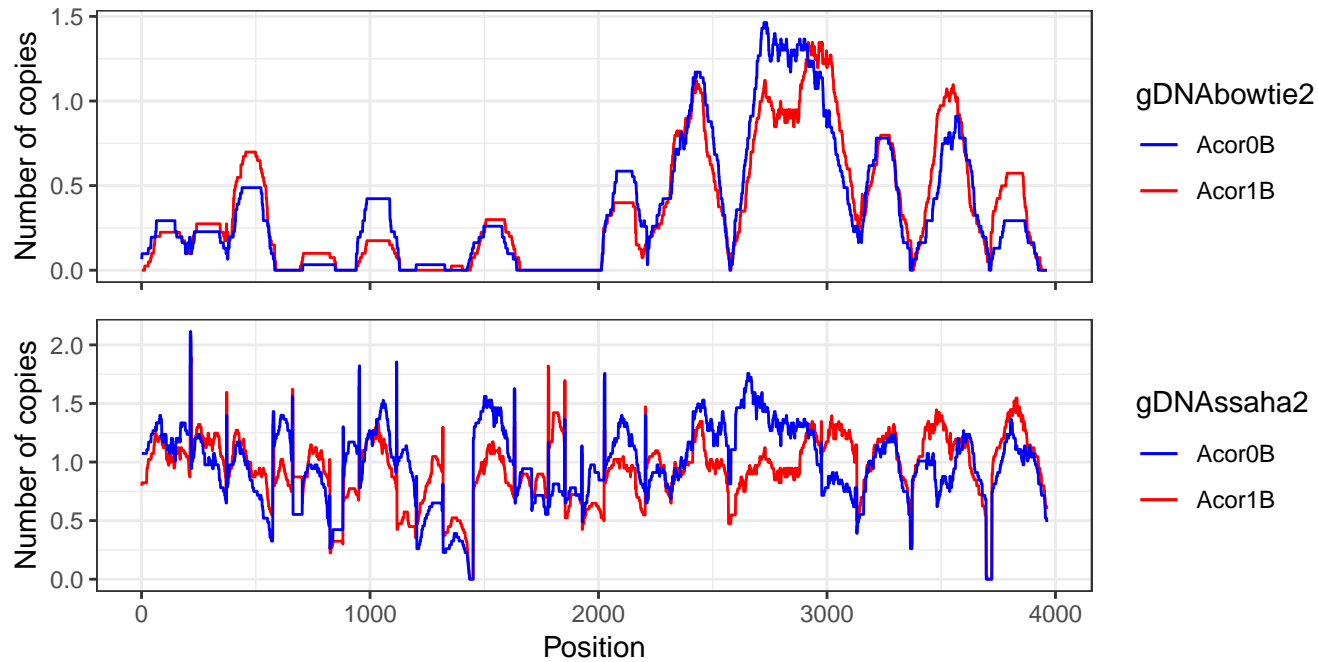

# XM\_007253558.3\_acetyl-CoA\_acyltransferase\_1\_(aca1)

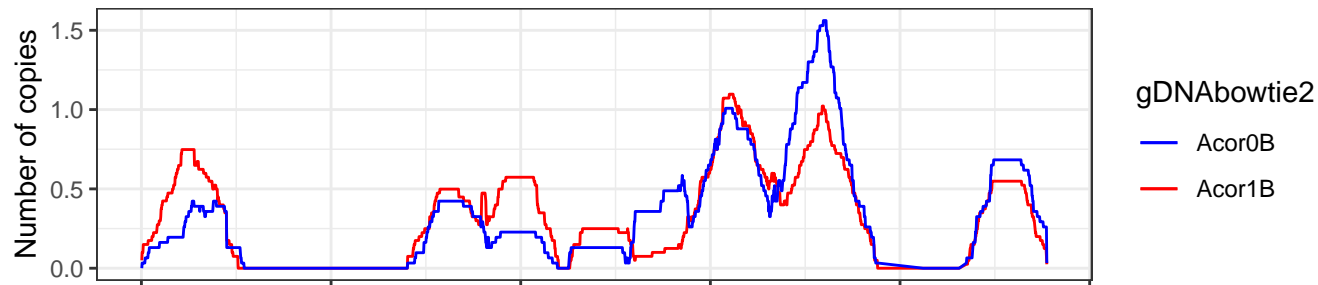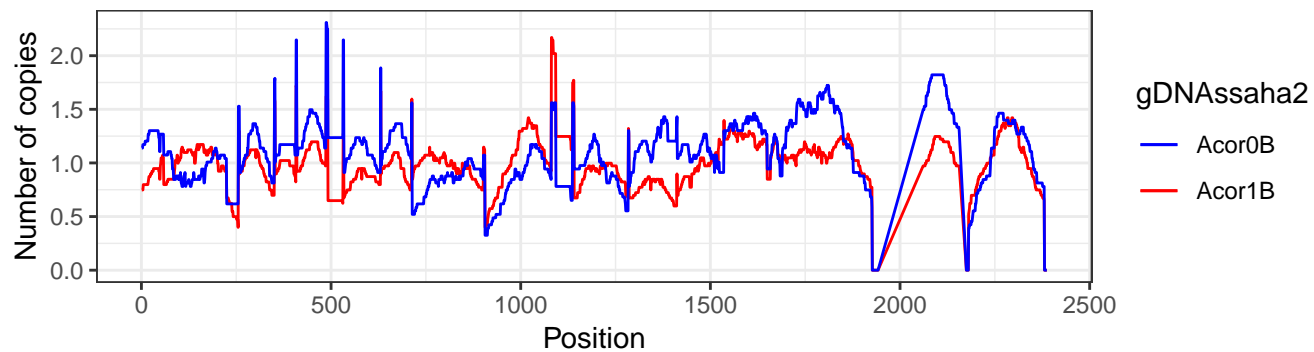

# XM\_007250949.3\_TBC/LysM-associated\_domain\_containing\_1\_(tlcd1)

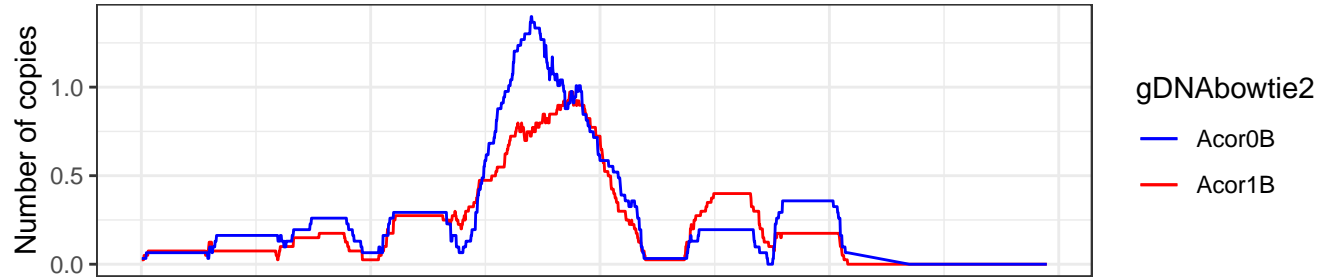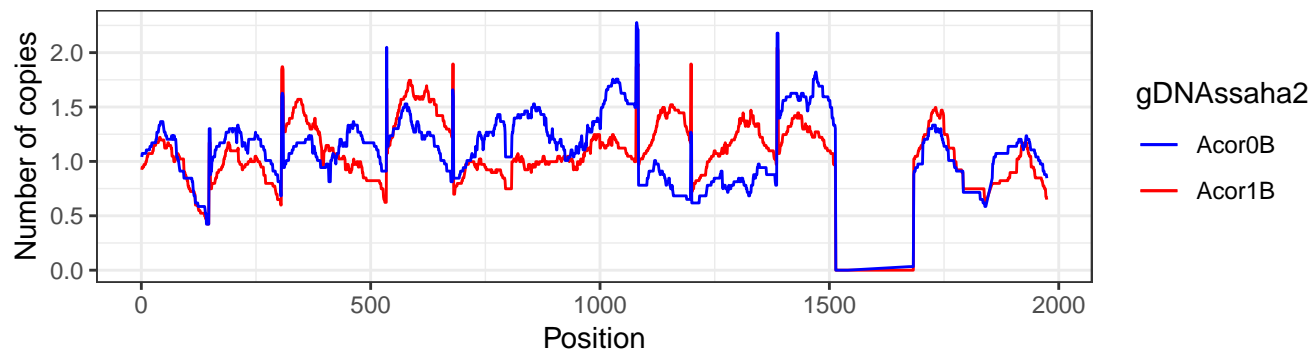

# XM\_022665963.1\_VPS35\_retromer\_complex\_component\_(vps35)

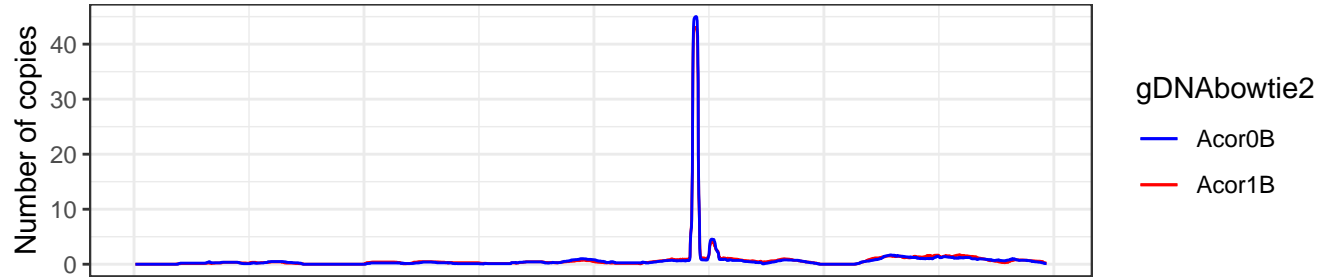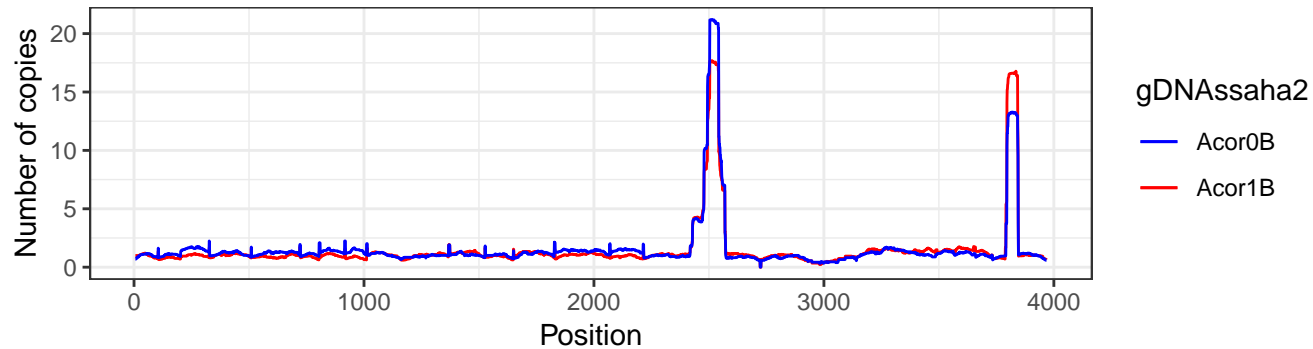



# XM\_015606676.2\_chondroitin\_sulfate\_synthase\_3\_(chsy3)

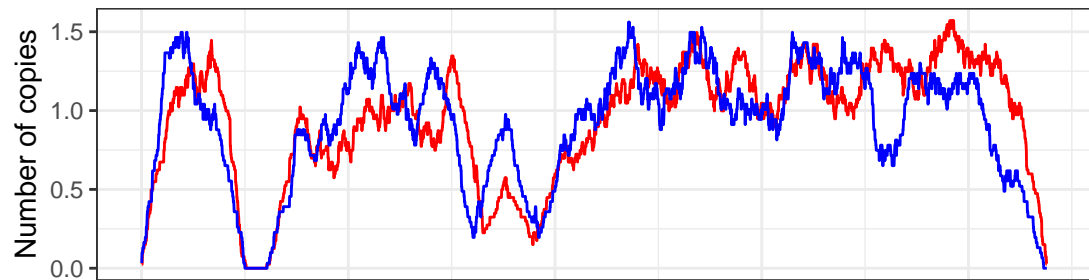

gDNA bowtie2

— Acor0B

— Acor1B

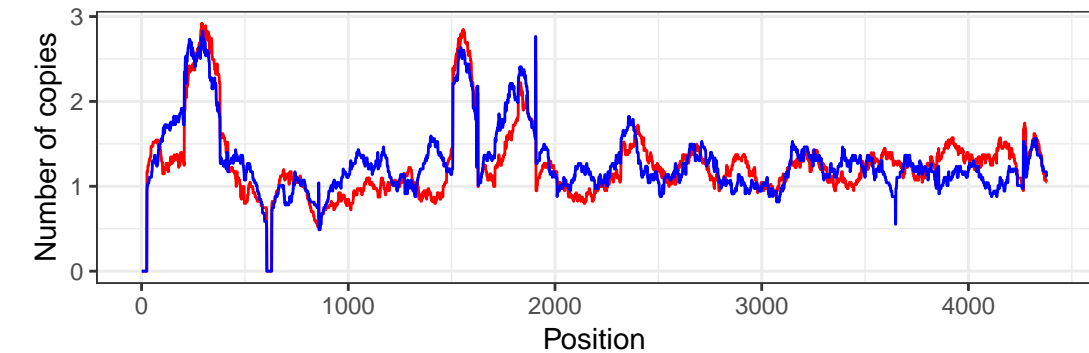

gDNA Assaha2

— Acor0B

— Acor1B

# XM\_015607831.2\_rhomboid\_like\_3\_(rhbdl3)

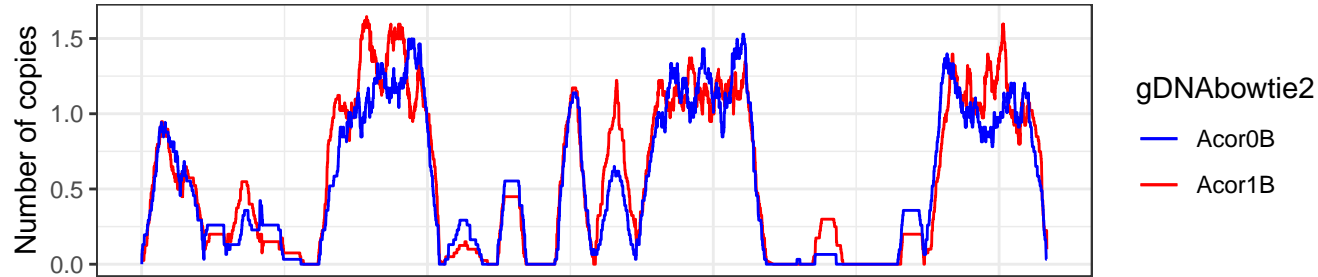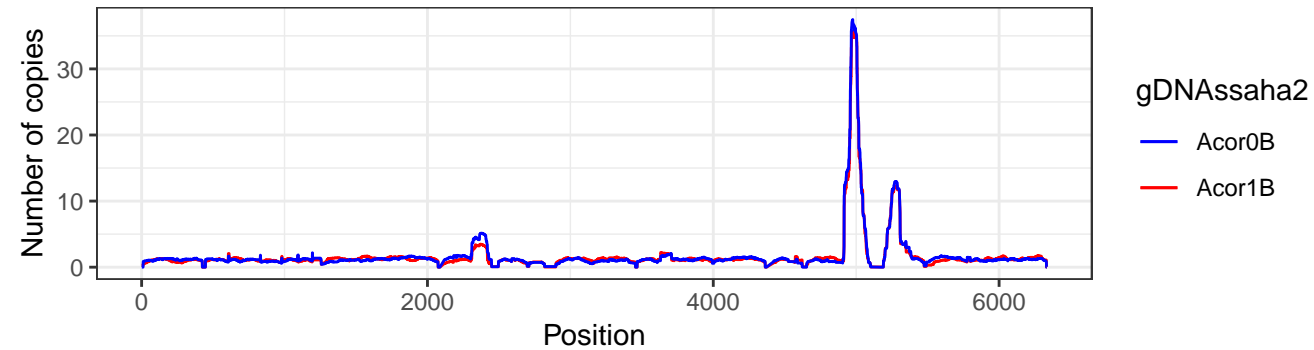

# XM\_022676895.1\_lysine\_methyltransferase\_2D\_(kmt2d)

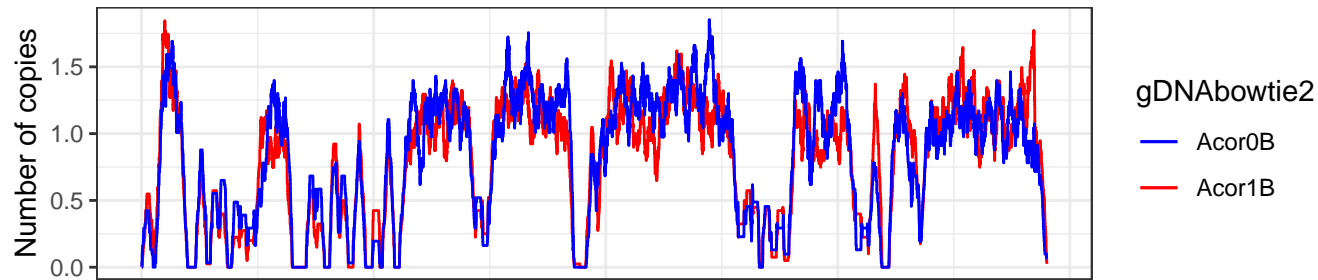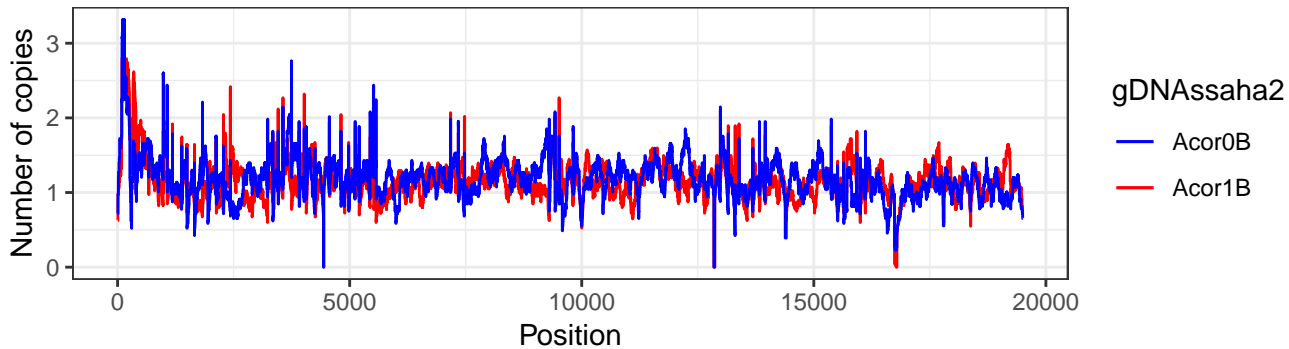

# XM\_007247811.3\_actin\_related\_protein\_2/3\_complex\_subunit\_1A\_(arpc1a)

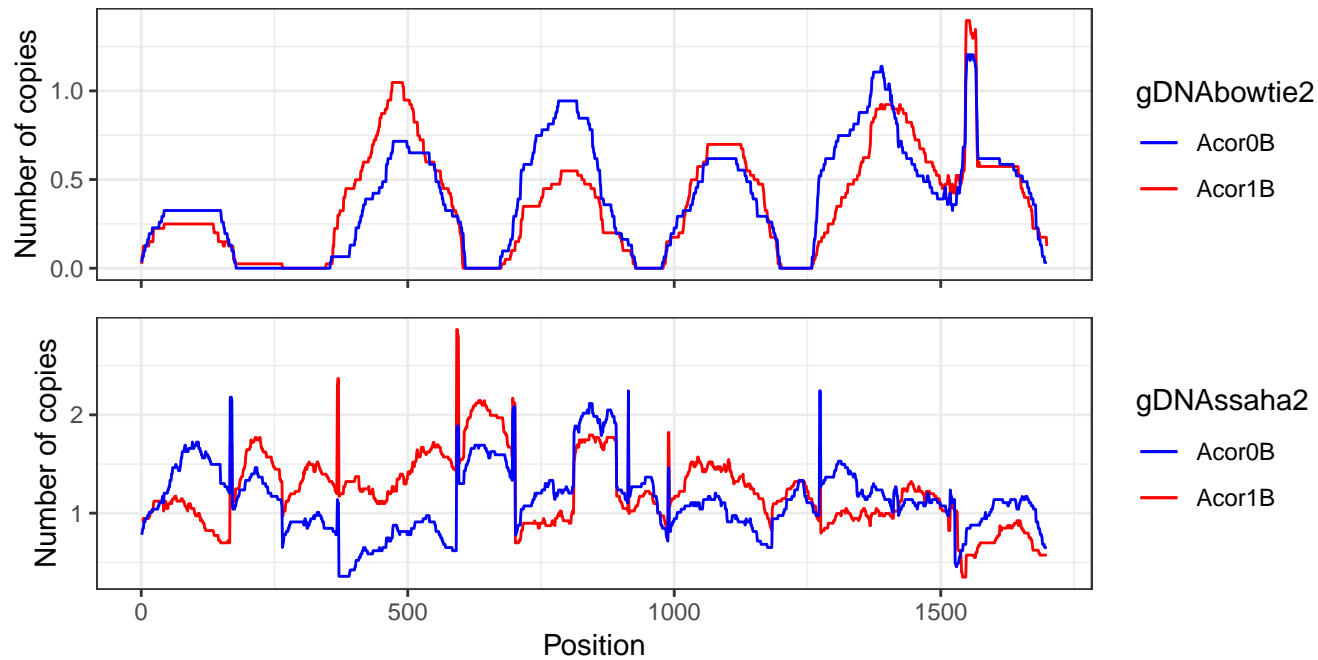

# XM\_022674299.1\_lyso-phosphatidylcholine\_acyltransferase\_3\_(lpcat3)

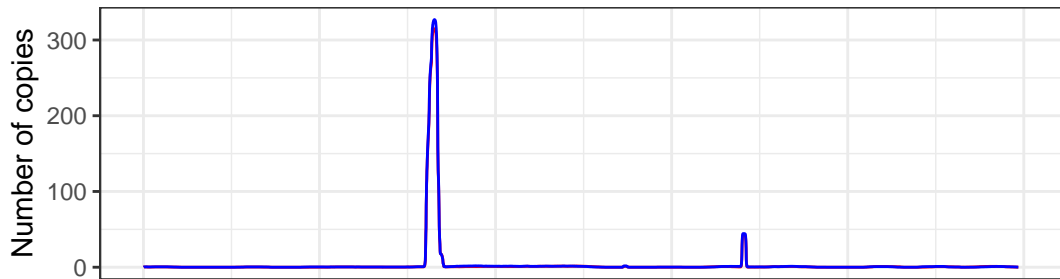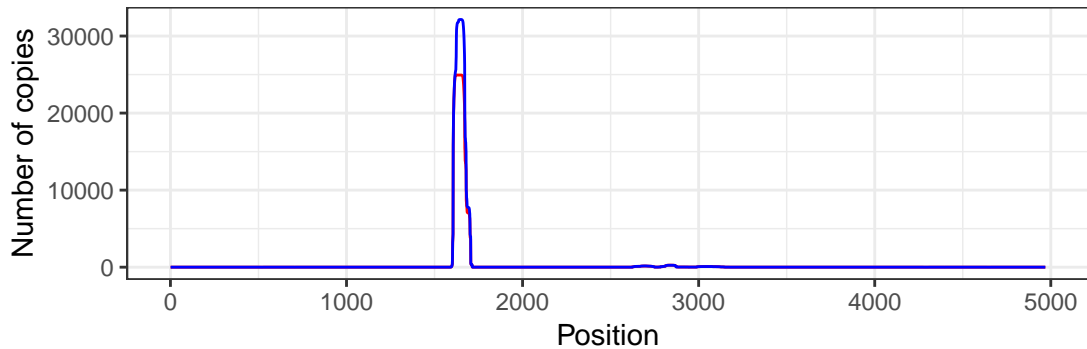

# XM\_007258330.3\_threonyl-tRNA\_synthetase\_(tars)

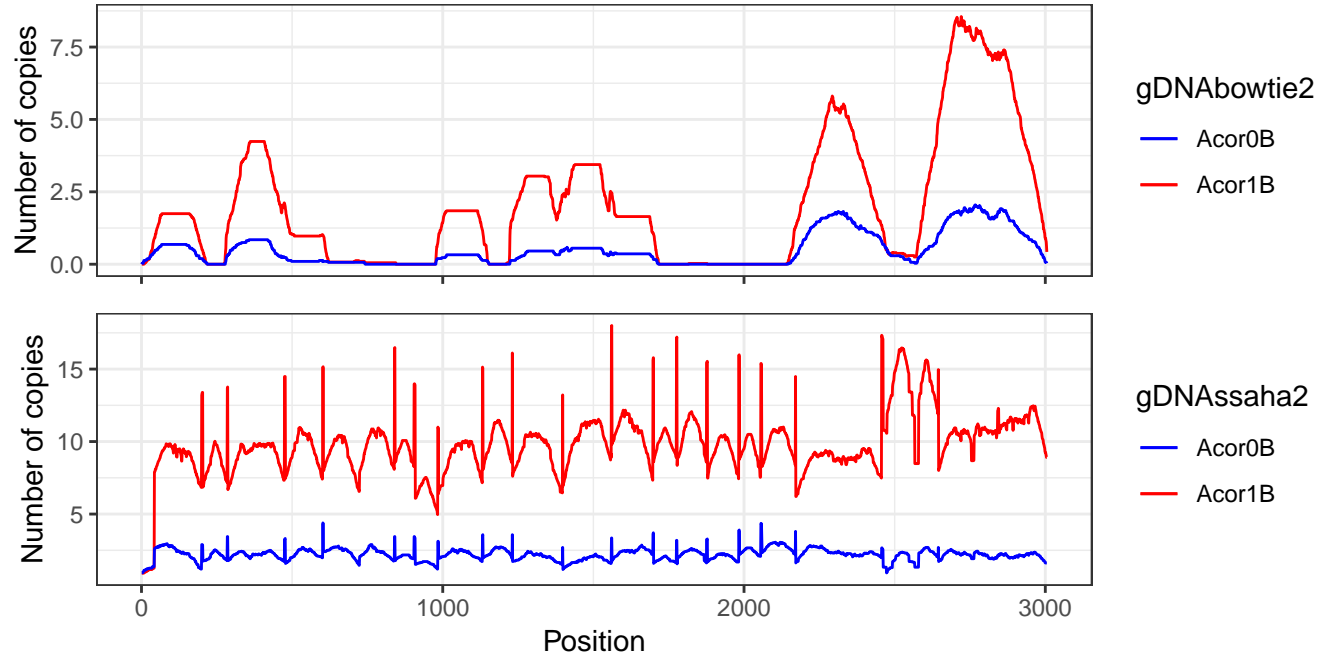

# XM\_007245225.3\_ubiquitin-fold\_modifier\_conjugating\_enzyme\_1\_(ufc1)

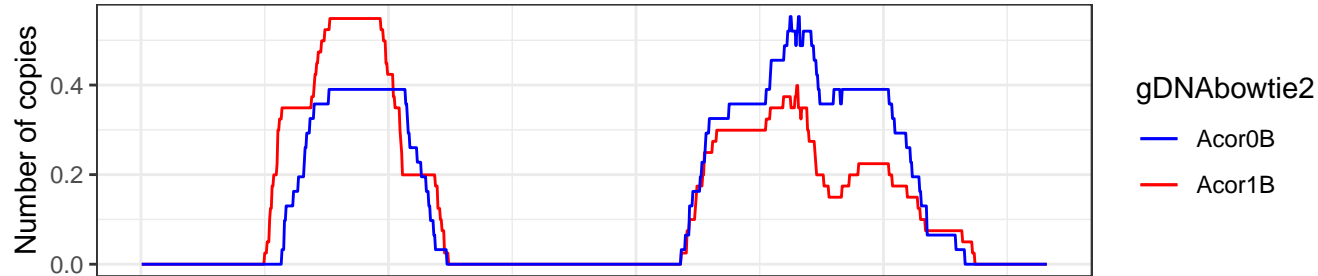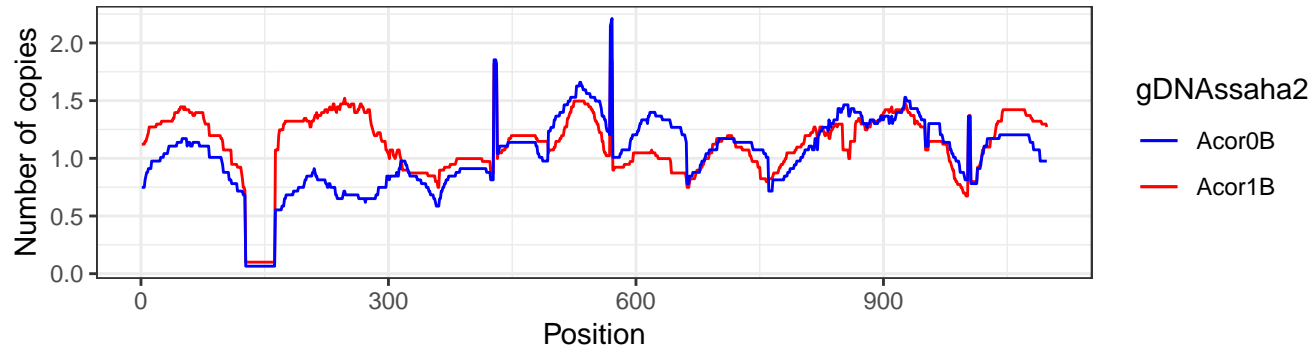

# XM\_007245436.3\_signal\_recognition\_particle\_9\_(srp9)

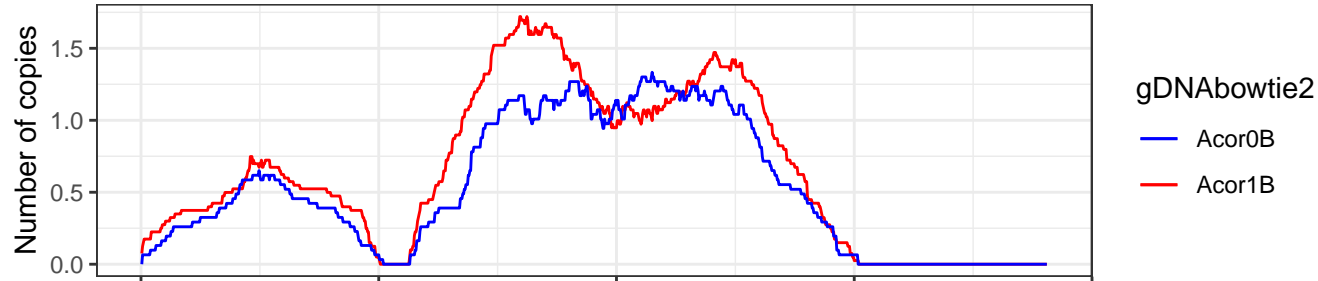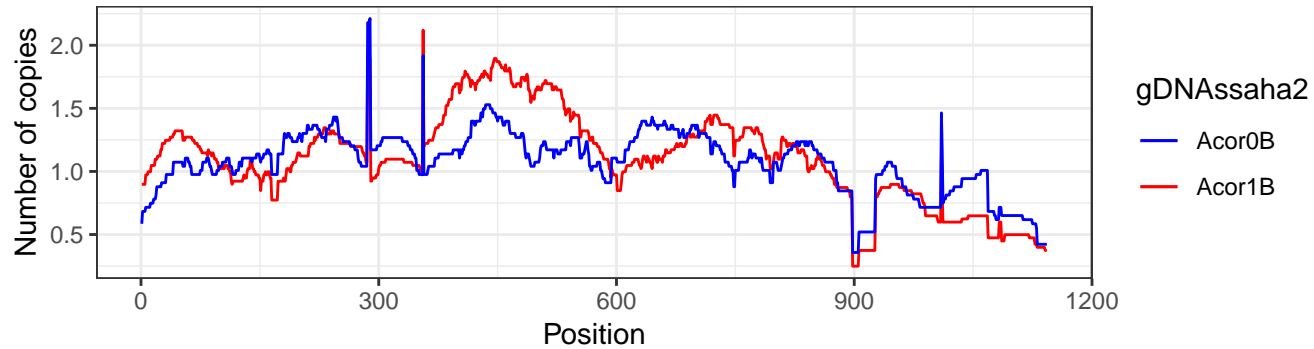



# XM\_007260419.2\_general\_transcription\_factor\_IIE\_subunit\_1\_(gtf2e1)

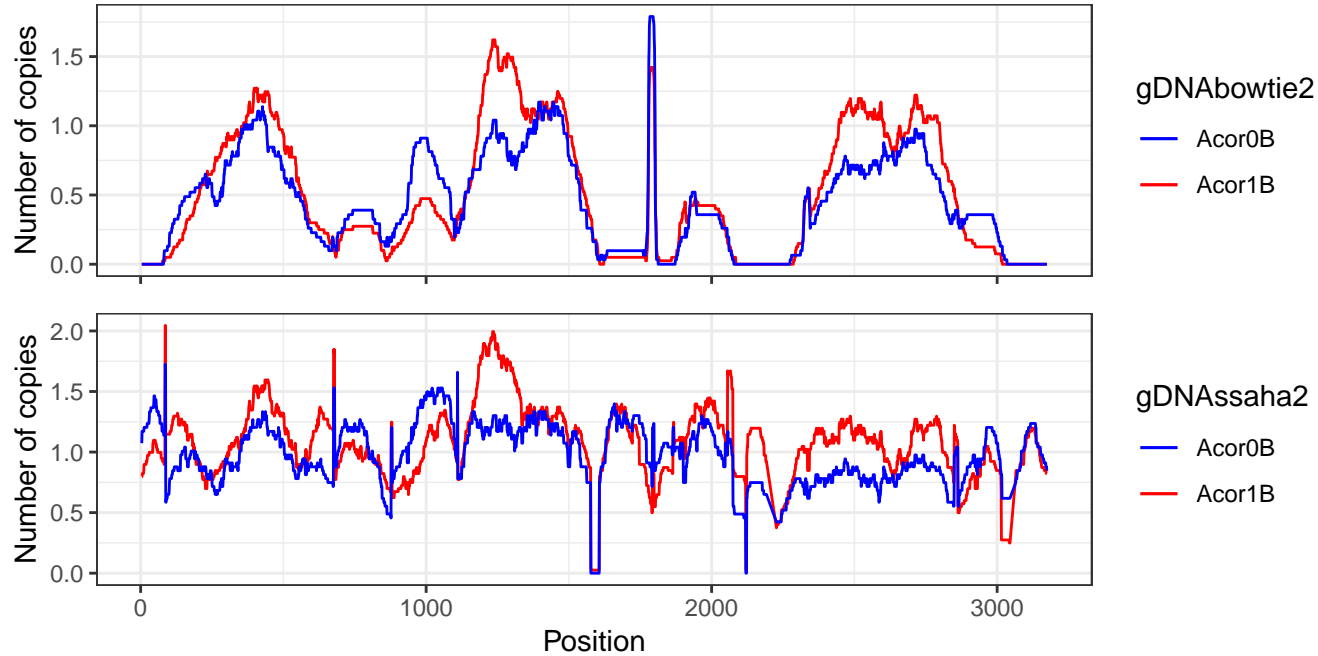

# XM\_022662213.1\_exosome\_component\_7\_(exosc7)

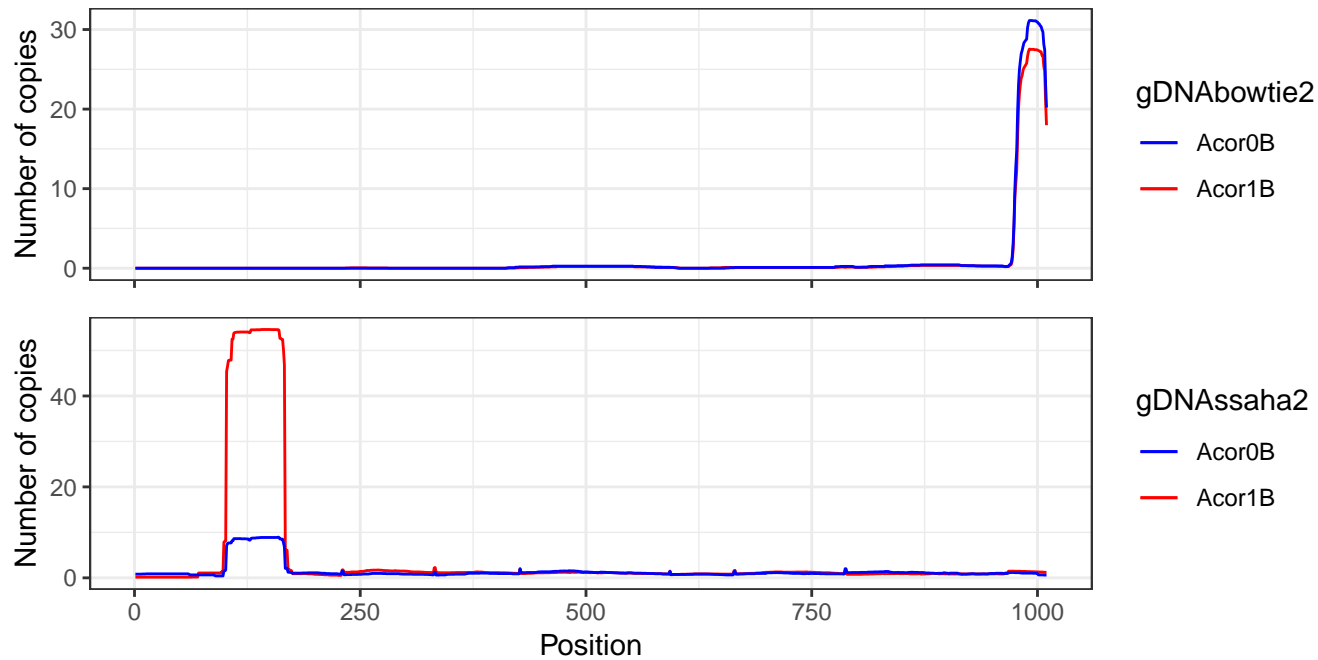

Supplement: 12864_2023_9883_MOESM4_ESM.pdf [file 12864_2023_9883_MOESM4_ESM.pdf]
