# Supplementary material for: Irreproducible results and unsupported conclusions in Ahmad et al. [BMC genomics (2020) 21:656]
Source: PubMed Central journal article supplement (PMC10726643; doi:10.1186/s12864-023-09883-4), 2023-12-18

# ENA|FO207880|FO207880.1\_ARA0AAA105YI15EM1\_tars

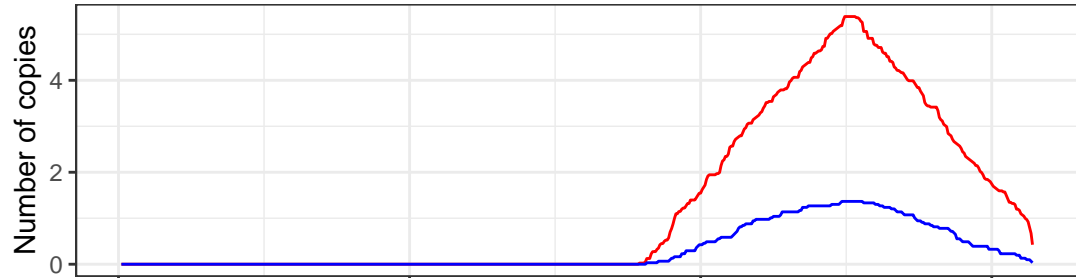

gDNA bowtie2

— Acor0B

— Acor1B

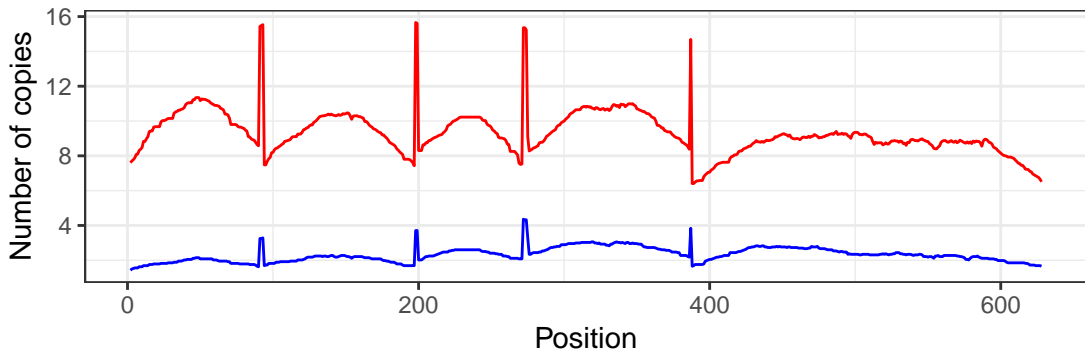

gDNA Assaha2

— Acor0B

— Acor1B

# ENA|FO214127|FO214127.1\_ARA0AAA12YF15EM1\_exosc7

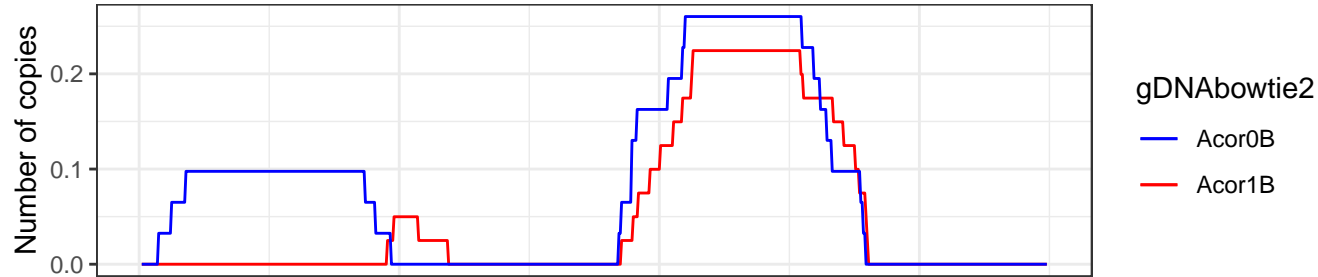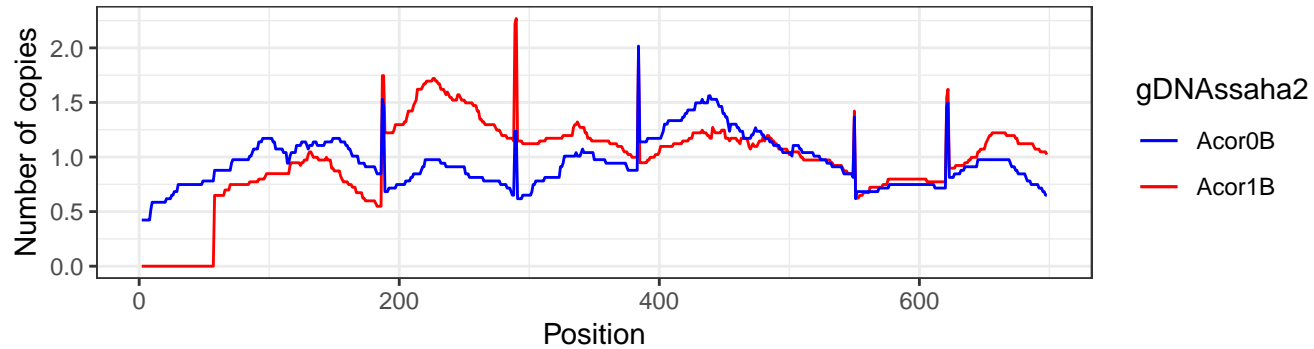

# ENA|FO248003|FO248003.1\_ARA0ABA11YM14EM1\_zgc

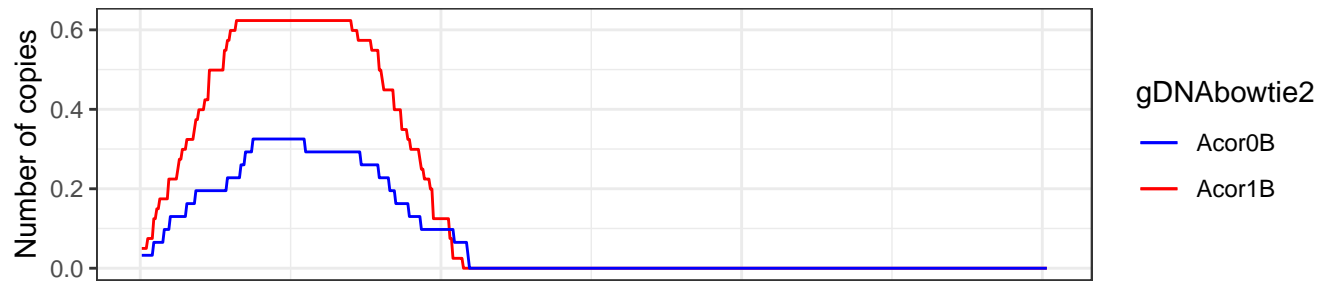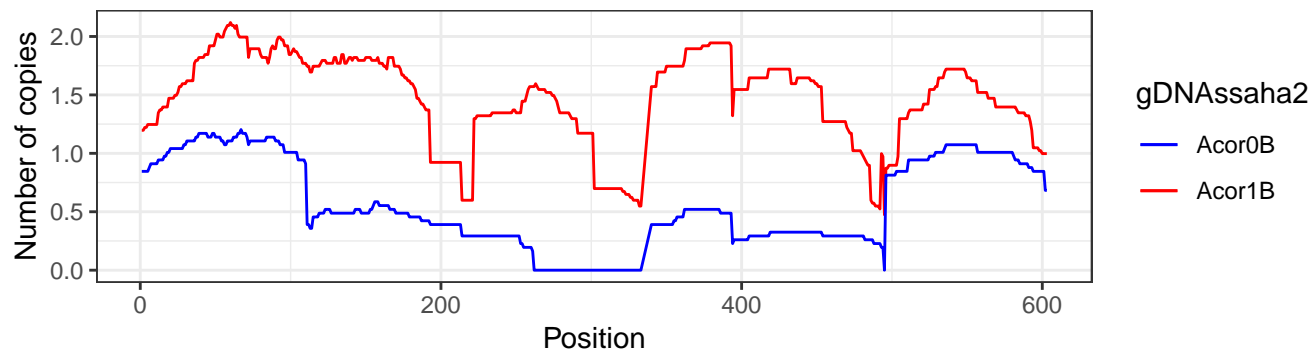

# ENA|FO261966|FO261966.1\_ARA0ABA3YF16EM1\_ndufa11

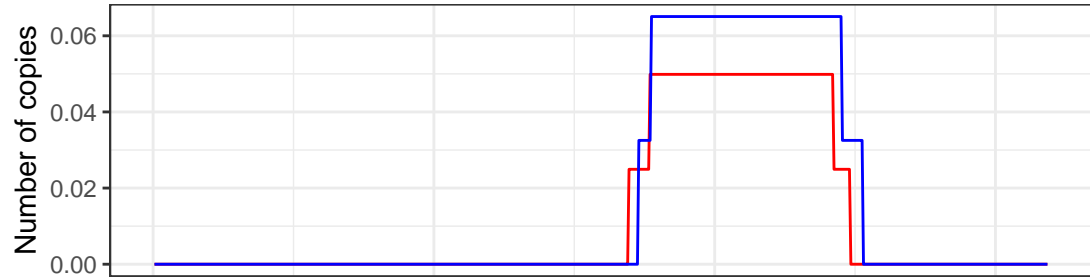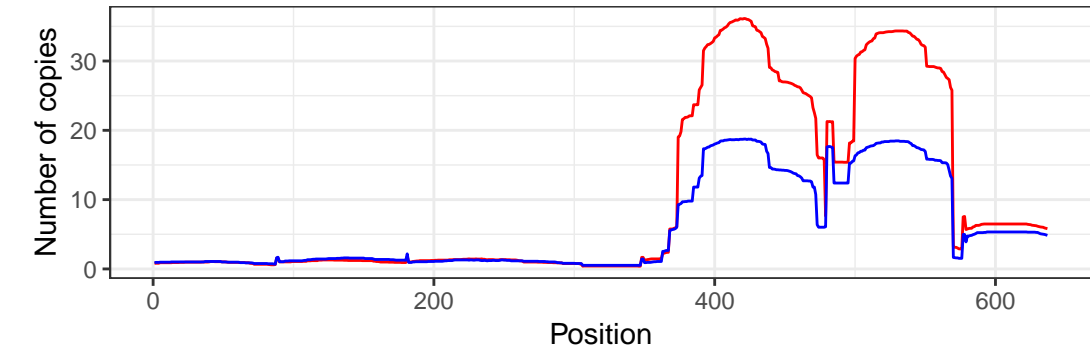

# ENA|FO256281|FO256281.1\_ARA0ABA22YA20EM1\_shisal1b

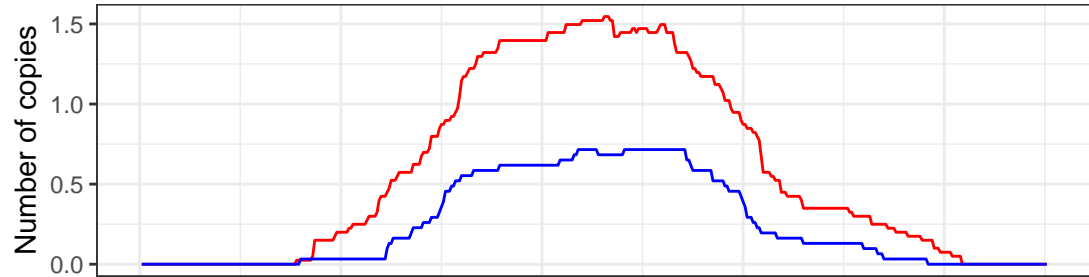

gDNA bowtie2

Acor0B

Acor1B

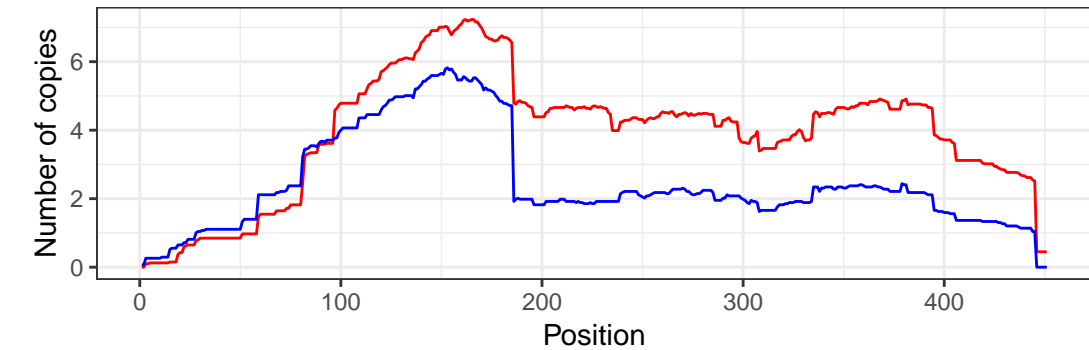

gDNA Assaha2

Acor0B

Acor1B

# ENA|FO260515|FO260515.1\_ARA0ABA43YF05EM1\_pcdh1g31

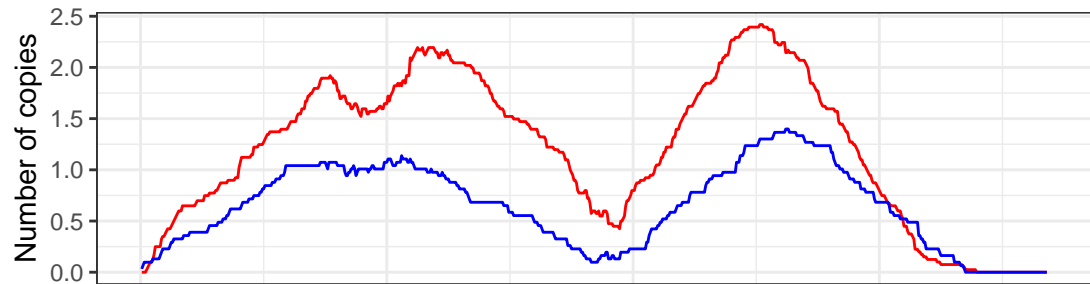

gDNA bowtie2

— Acor0B

— Acor1B

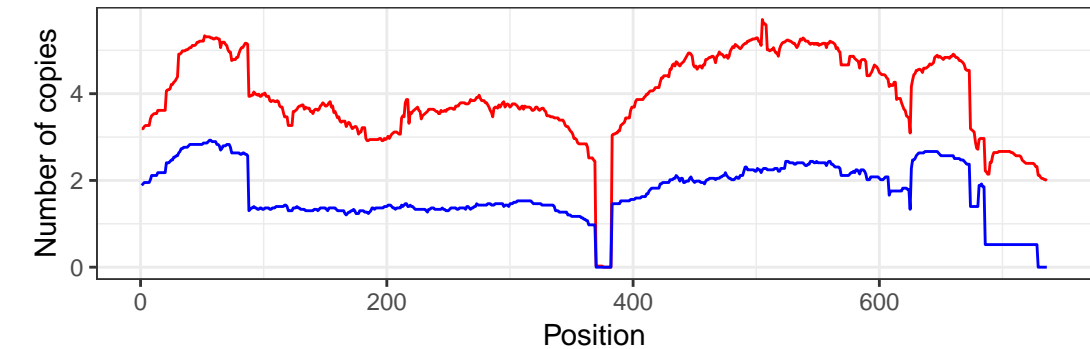

gDNA Assaha2

— Acor0B

— Acor1B

# ENA|FO204377|FO204377.1\_ARA0AAA114YE08EM2\_vps35

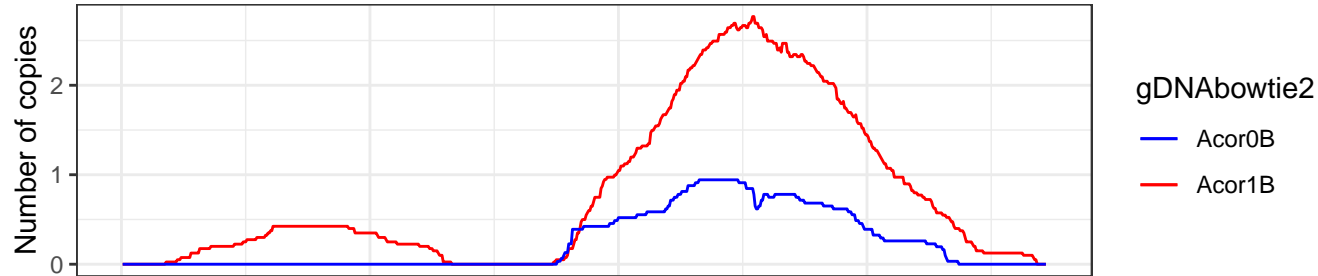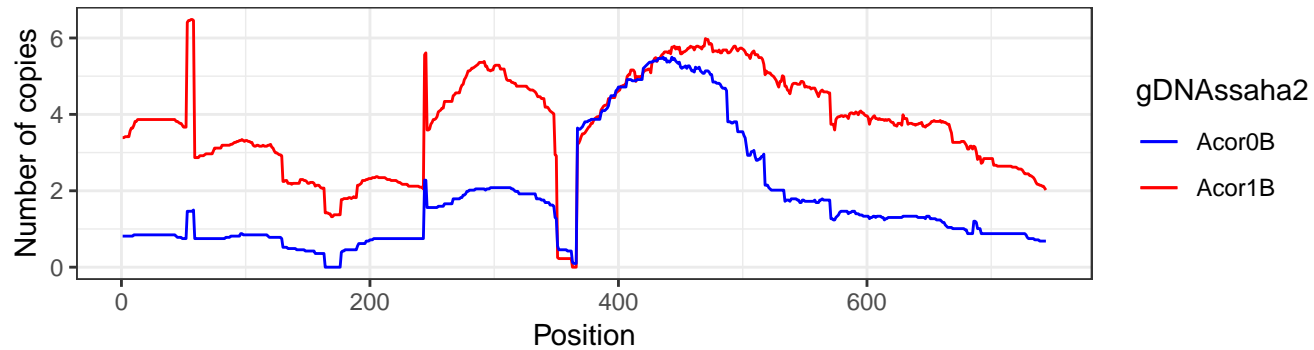

# ENA|FO361455|FO361455.1\_ARA0AFA5YA16EM1\_gon4I

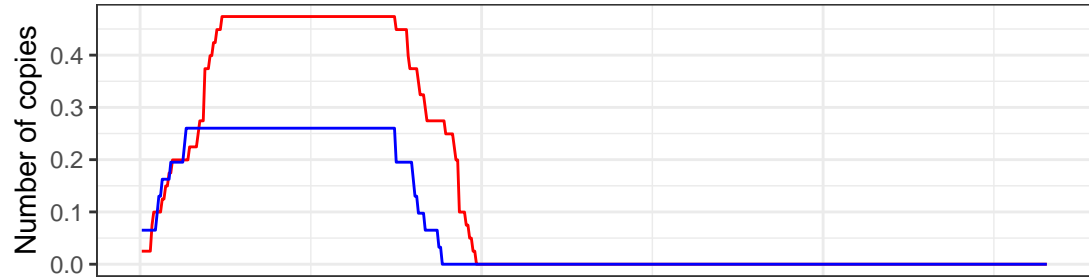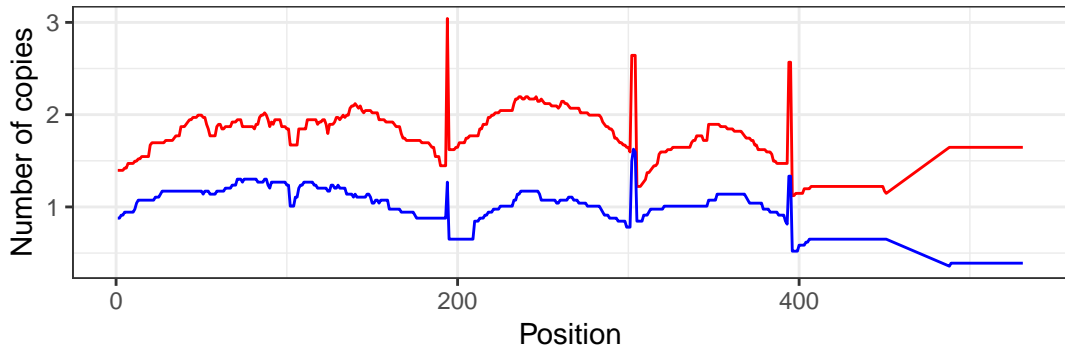



# ENA|FO215912|FO215912.1\_ARA0AAA117YG08EM1\_scn12aa

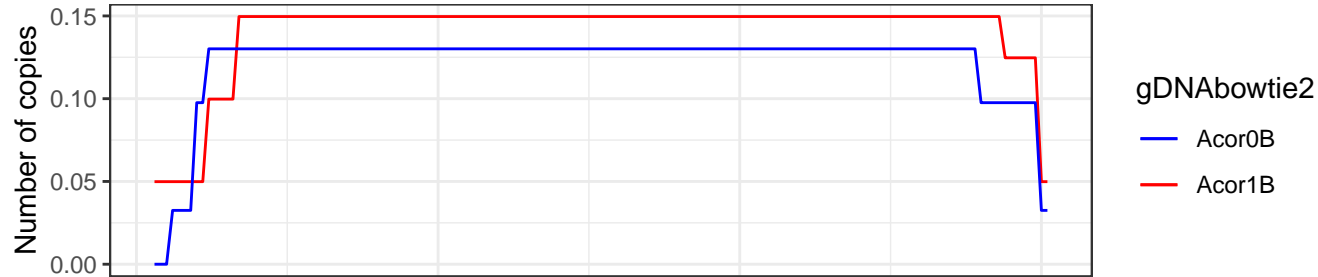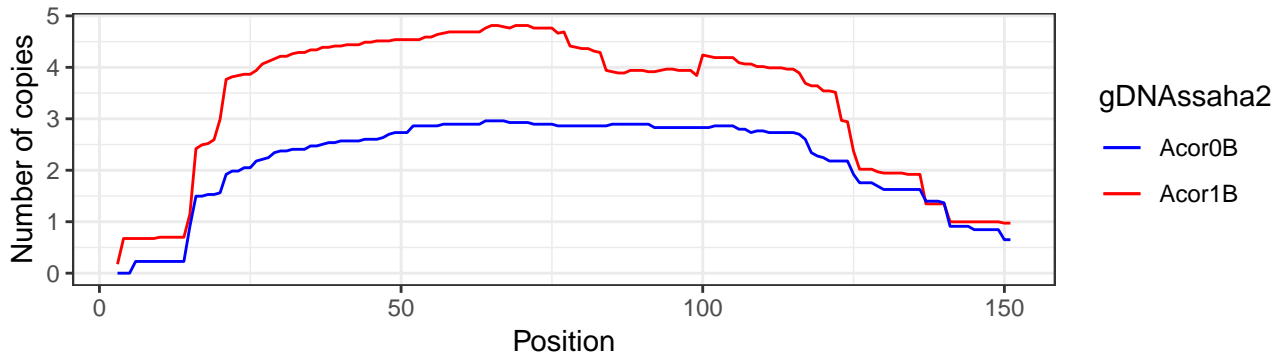

# ENA|FO340667|FO340667.1\_ARA0AEA6YB13EM1\_fabp11b

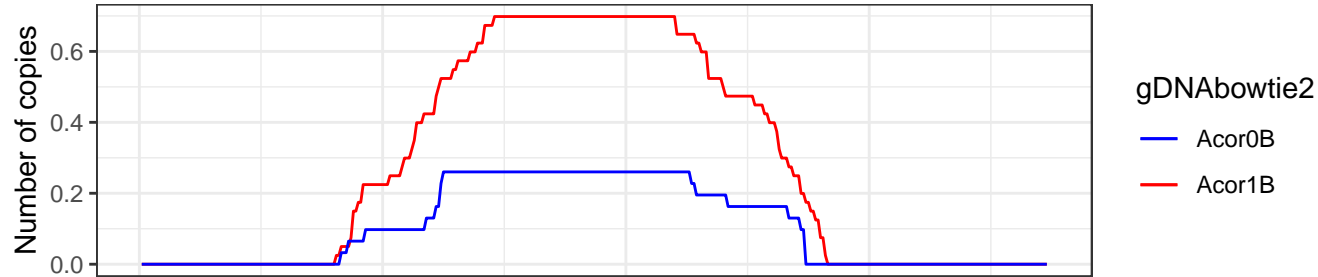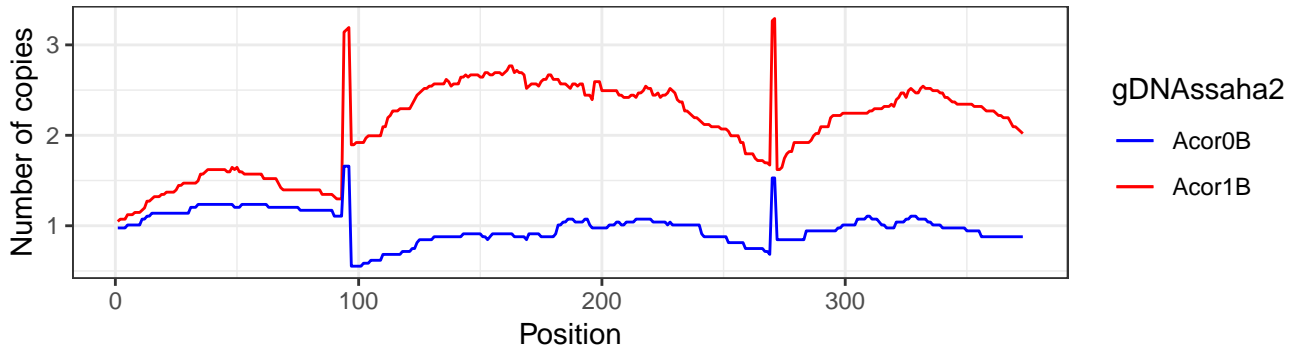

# ENA|FO230351|FO230351.1\_ARA0AAA69YO04EM1\_ipo11

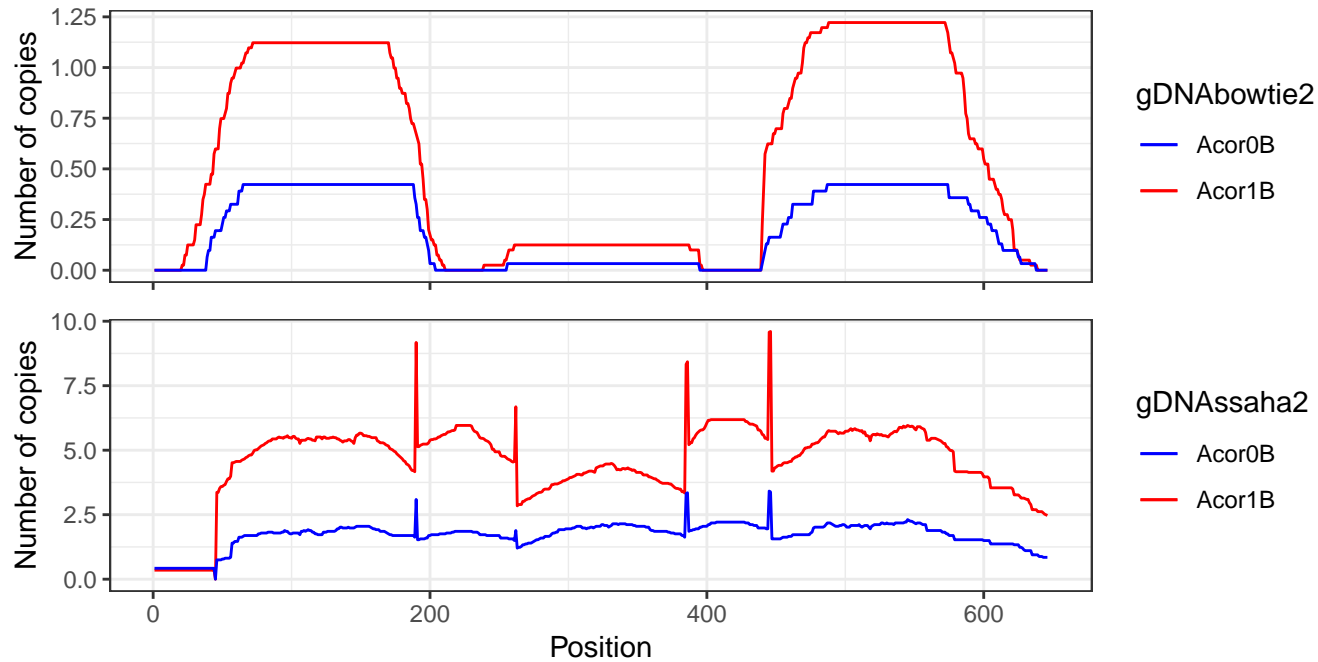

ENA|FO215953|FO215953.1\_ARA0AAA117YE05EM1\_kmt2d

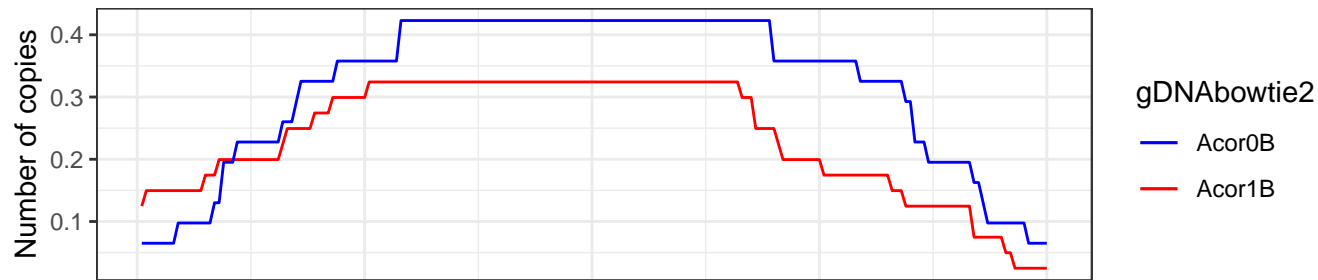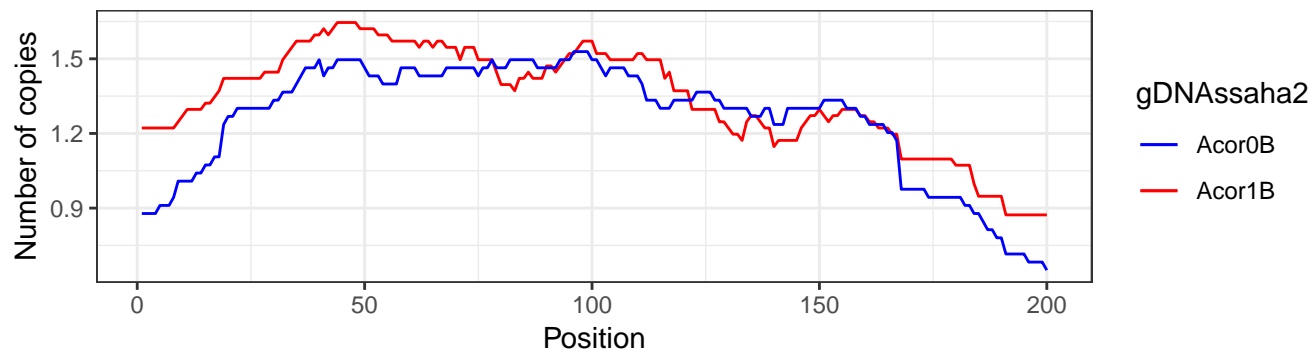

# ENA|FO218340|FO218340.1\_ARA0AAA32YE23EM1\_lpcat3

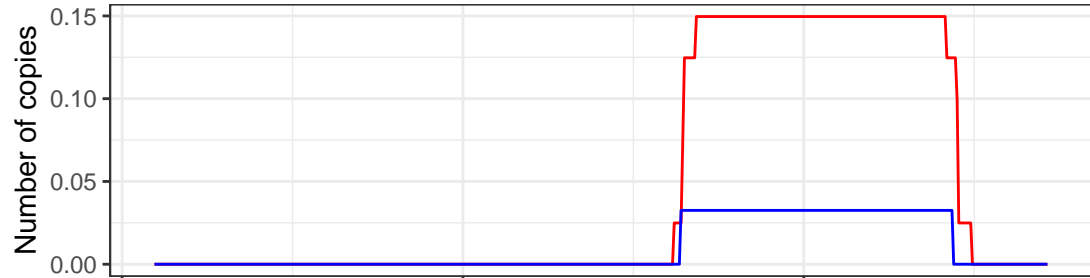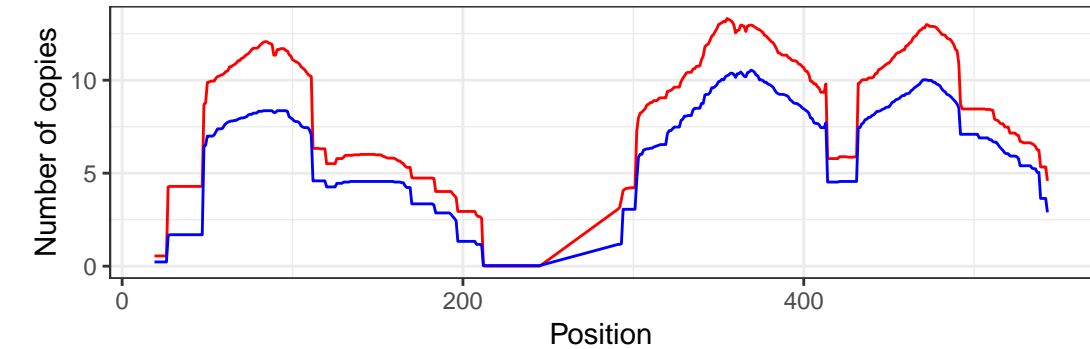

# ENA|FO240476|FO240476.1\_ARA0AAA75YO09EM1\_sacs

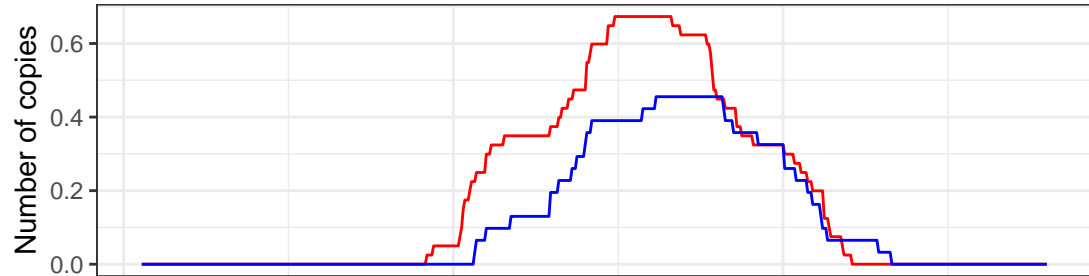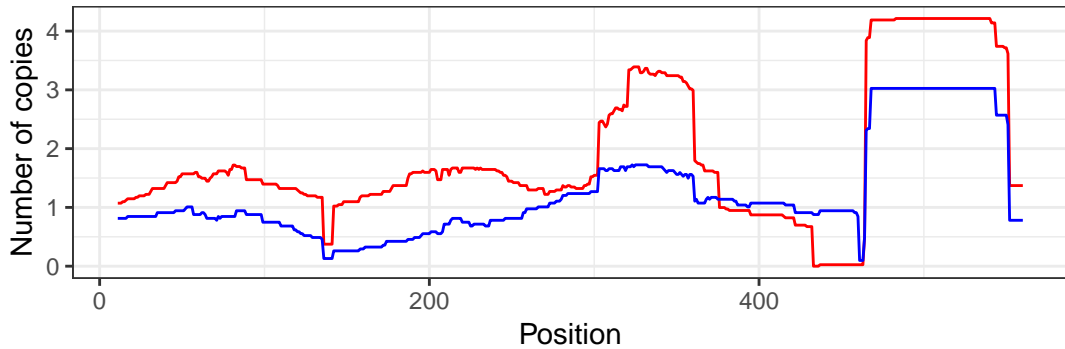

# ENA|FO212474|FO212474.1\_ARA0AAA16YP23EM1\_slc16a13

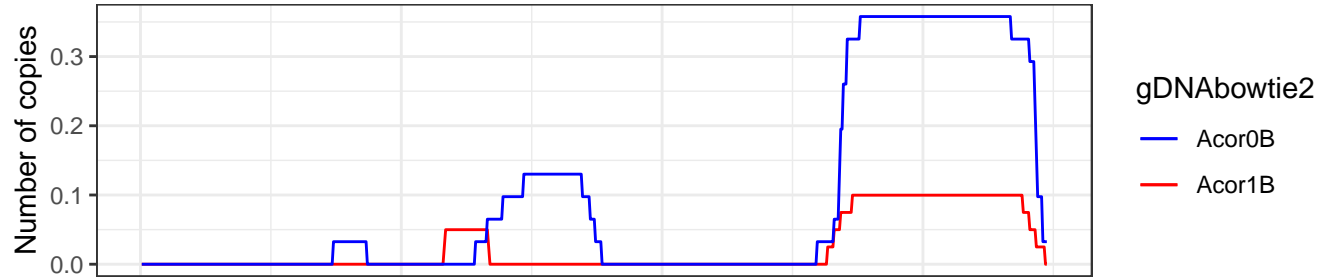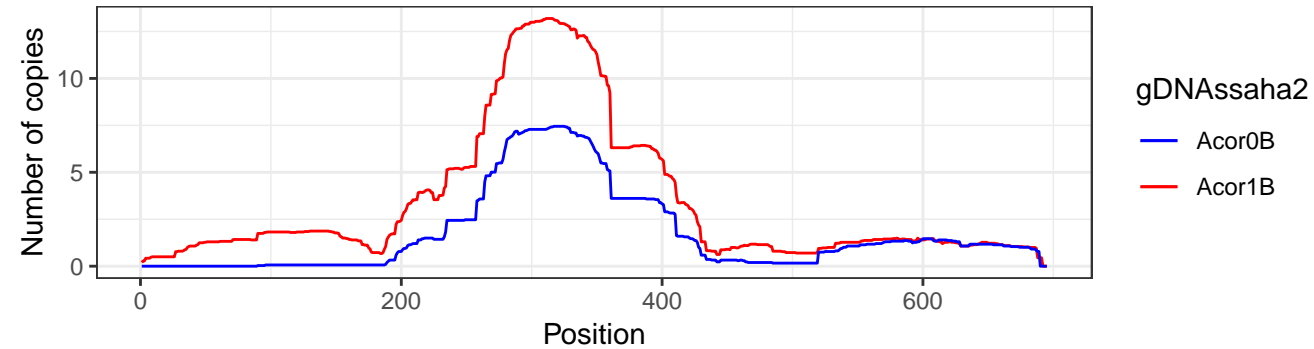

# ENA|FO254907|FO254907.1\_ARA0ABA25YP07EM1\_wnk4b

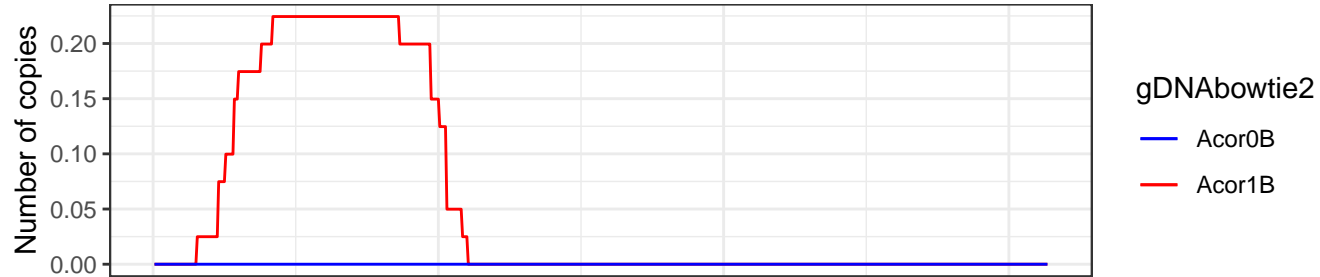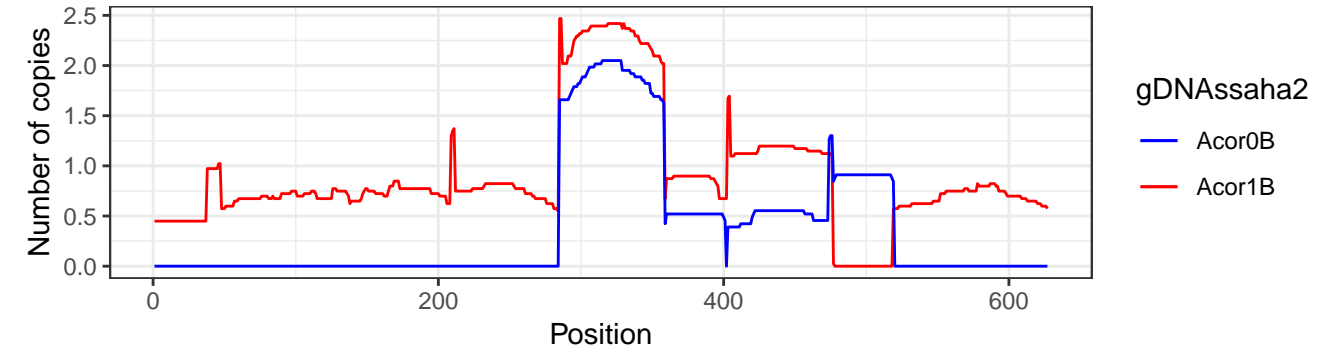



# ENA|FO283052|FO283052.1\_ARA0ABA82YL21EM1\_si

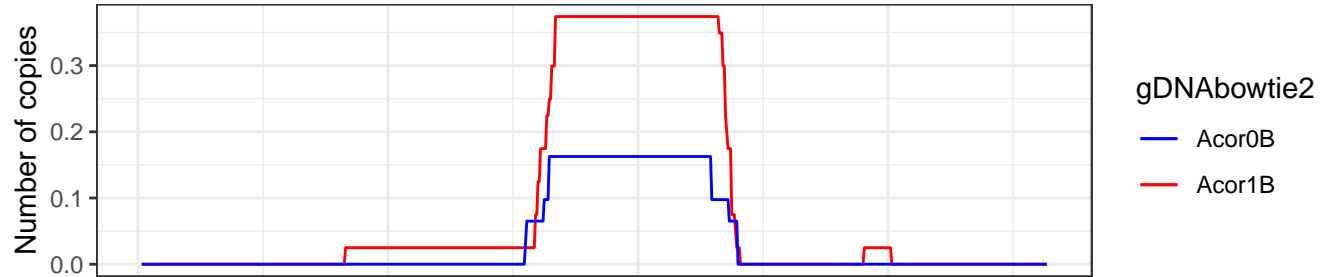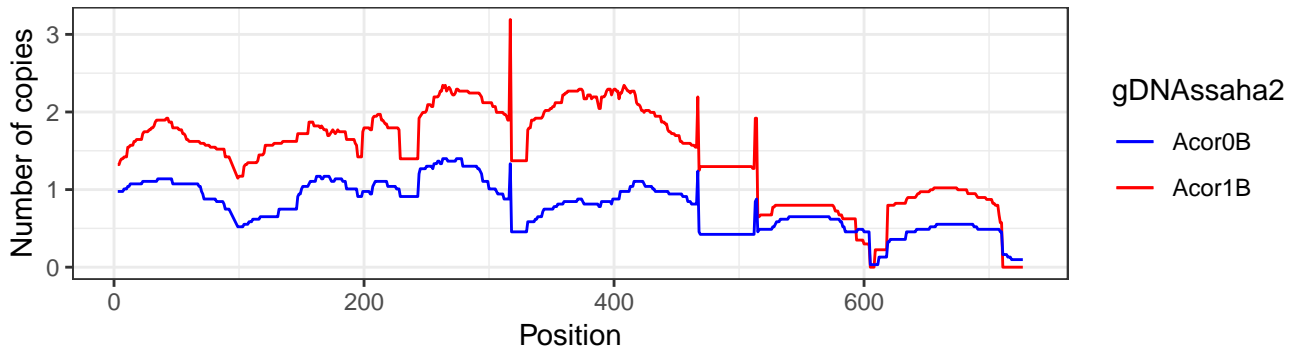

# ENA|FO223881|FO223881.1\_ARA0AAA54YA18EM1\_zgc

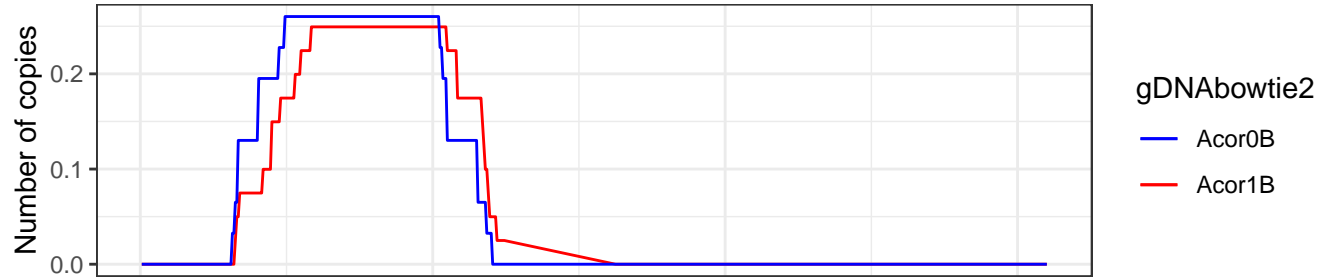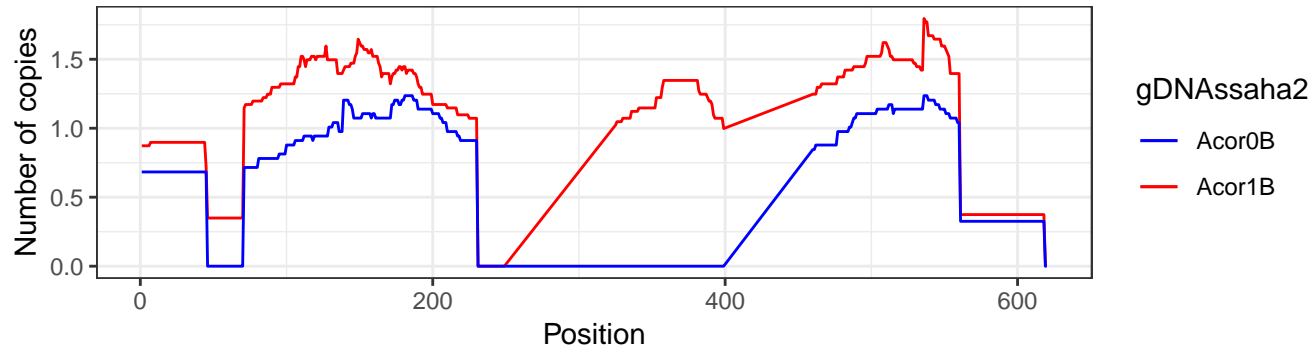

# ENA|FO254136|FO254136.1\_ARA0ABA105YA05EM1\_si

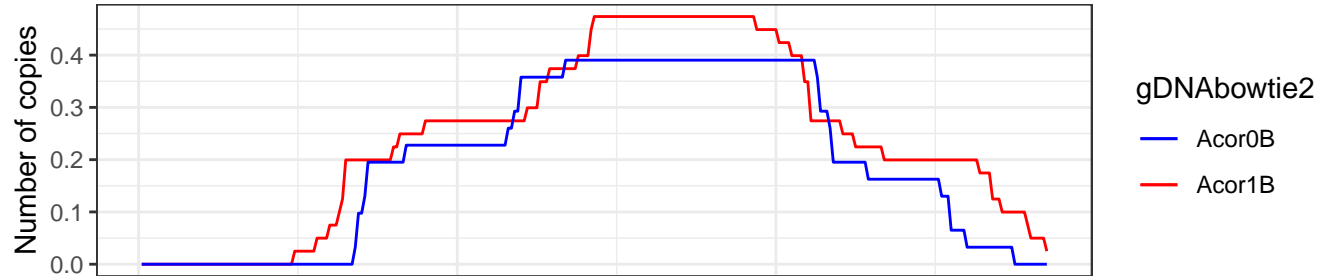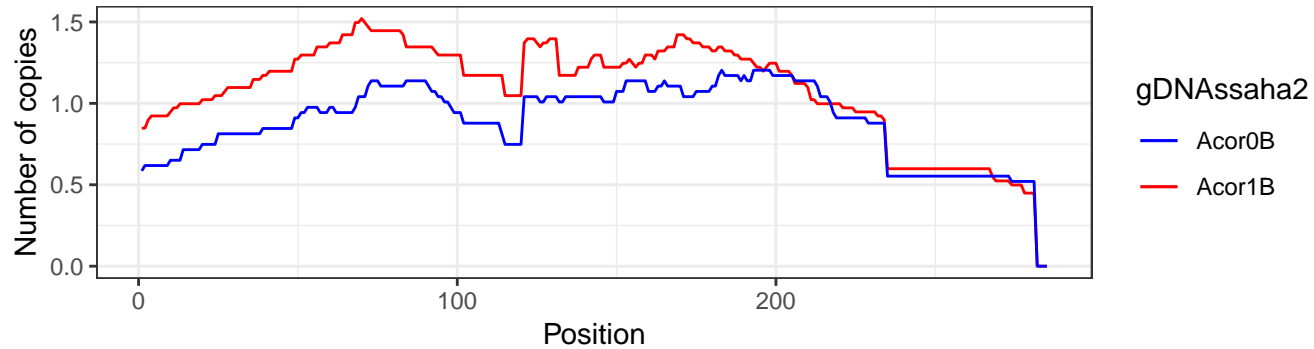

# ENA|FO242782|FO242782.1\_ARA0ABA101YH11EM1\_acaa1

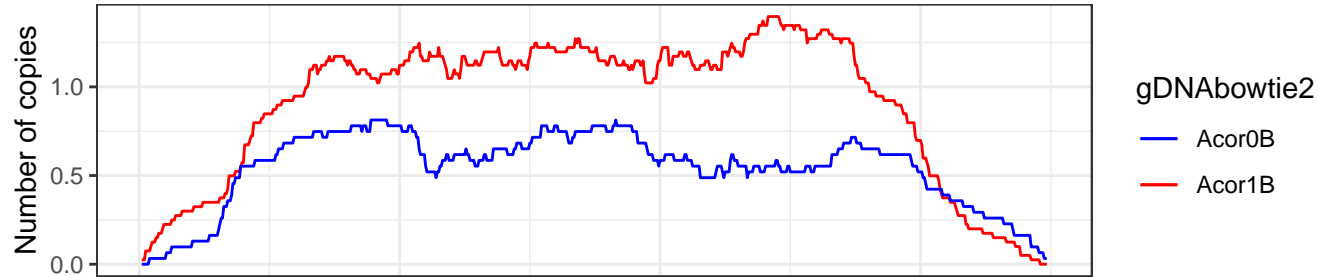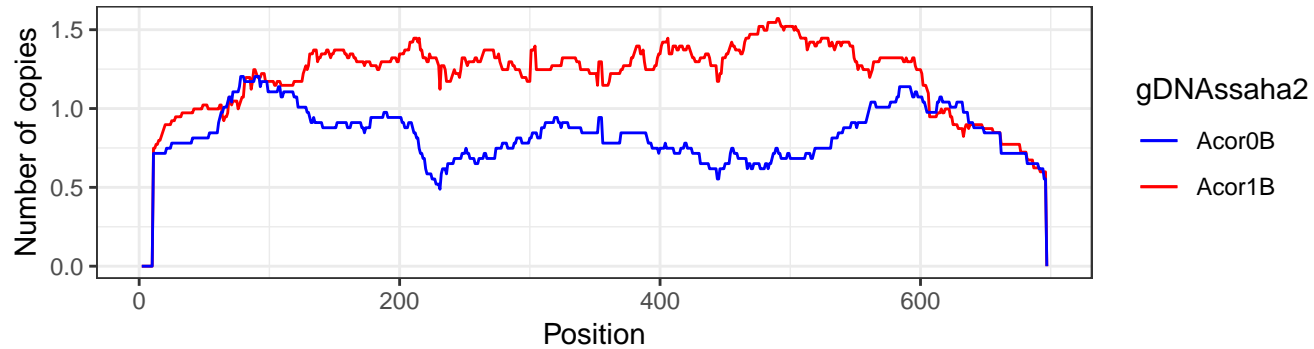

# ENA|FO266064|FO266064.1\_ARA0ABA2YC21EM1\_mbd5

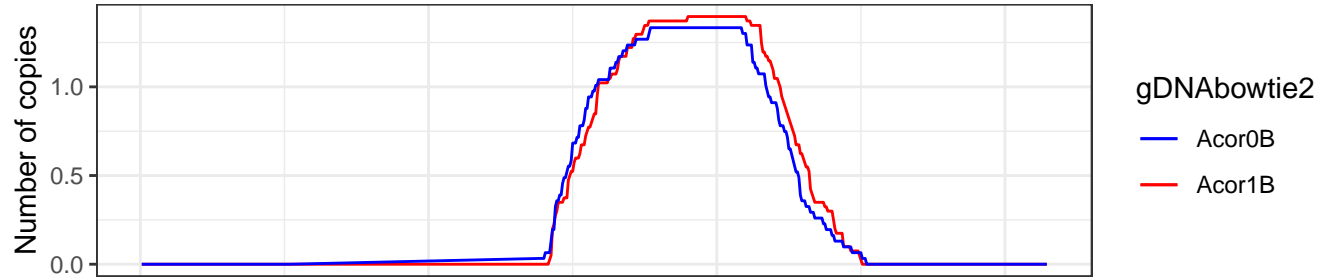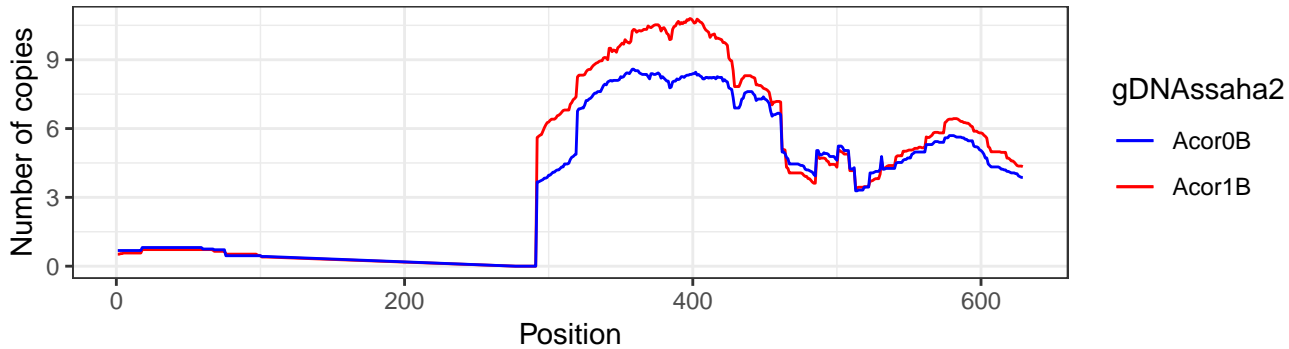

# ENA|FO251254|FO251254.1\_ARA0ABA111YP21EM1\_hsd11b1la

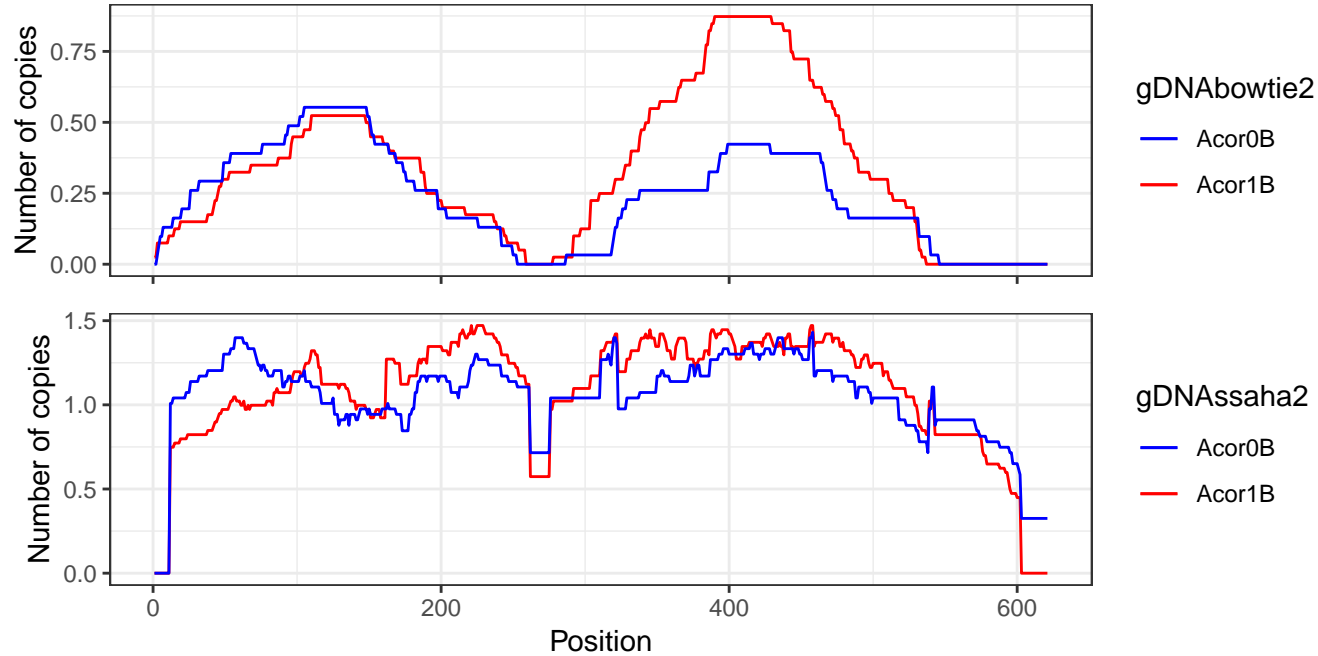

# ENA|FO302843|FO302843.1\_ARA0ACA3YE14EM1\_gtf2e1

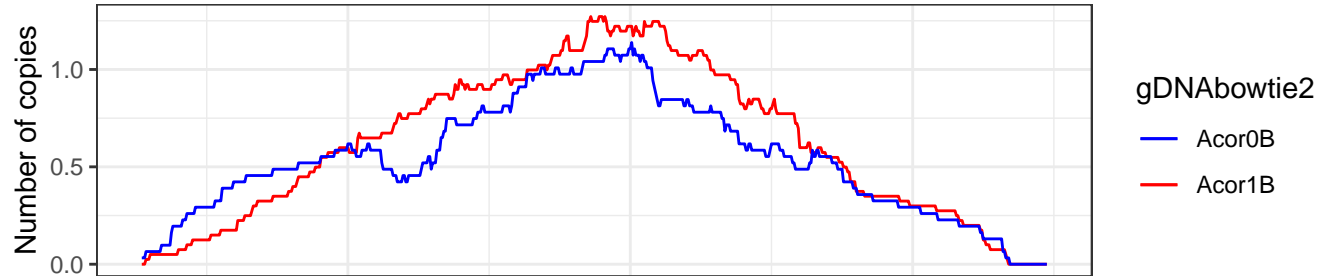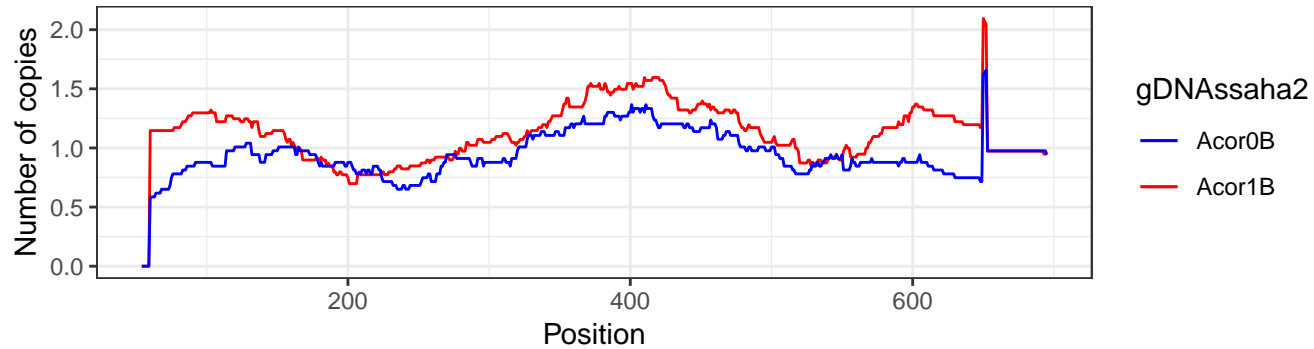

# ENA|FO283585|FO283585.1\_ARA0ABA81YE02EM1\_MTG2

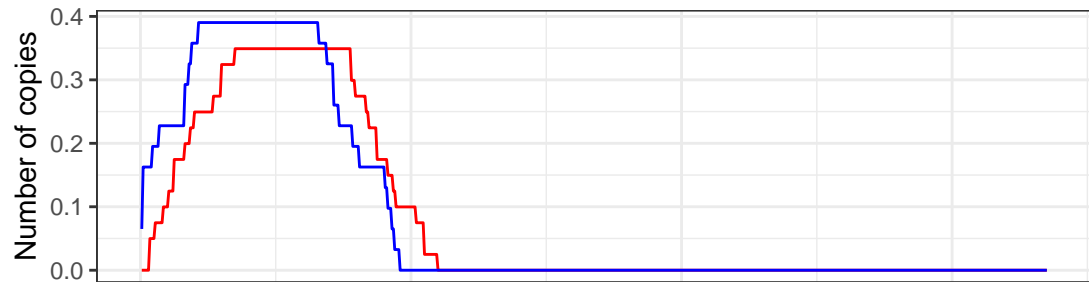

gDNA bowtie2

Acor0B

Acor1B

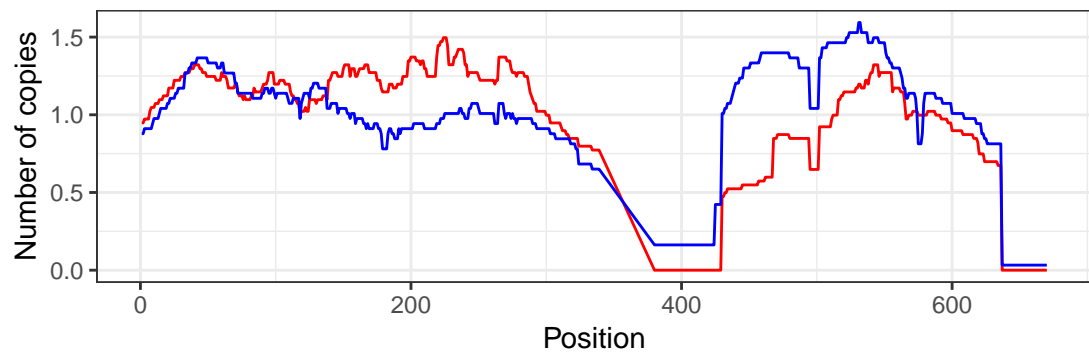

gDNA Assaha2

Acor0B

Acor1B



# ENA|FO345462|FO345462.1\_ARA0AFA26YG15EM1\_vegfaa

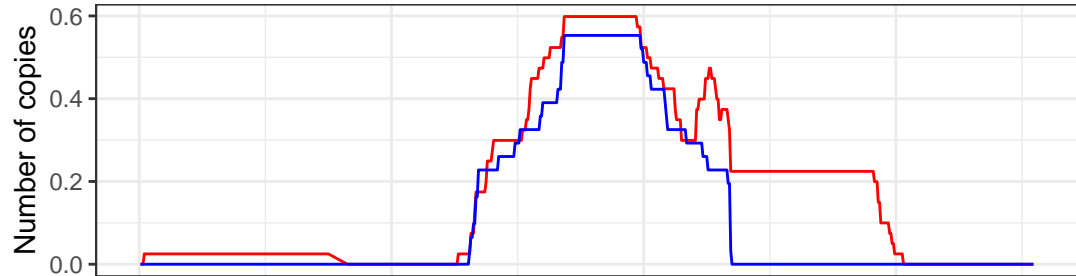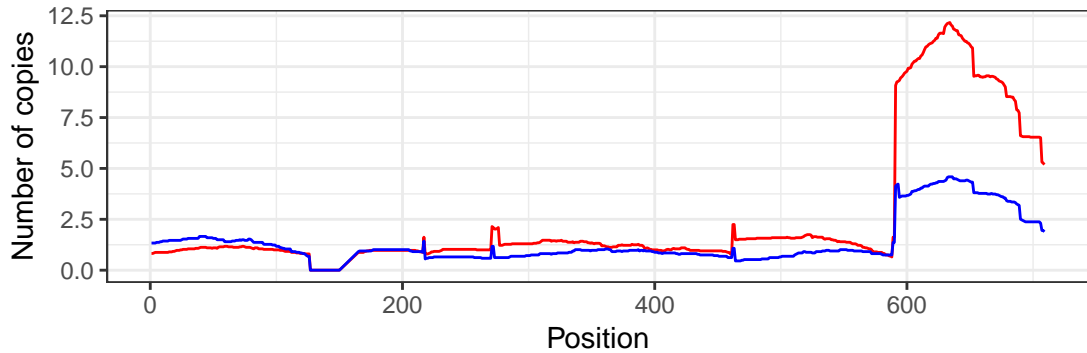

# ENA|FO239960|FO239960.1\_ARA0AAA77YF13EM1\_doc2b

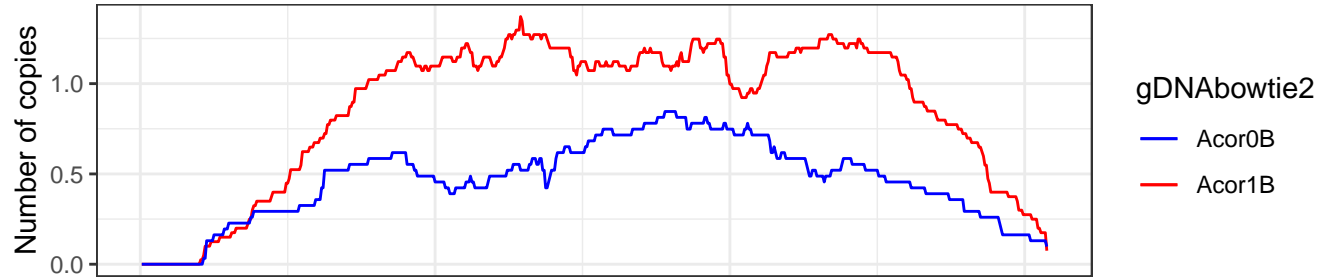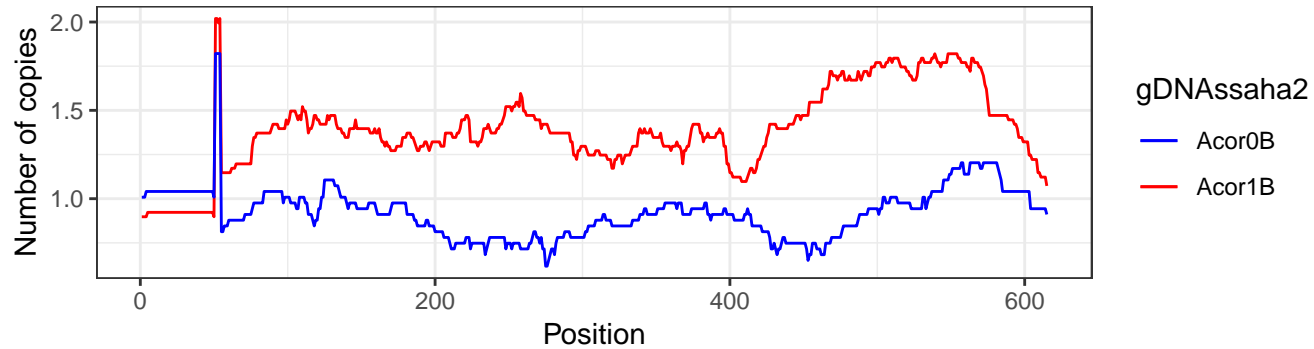

# ENA|FO222595|FO222595.1\_ARA0AAA57YJ09EM1\_si

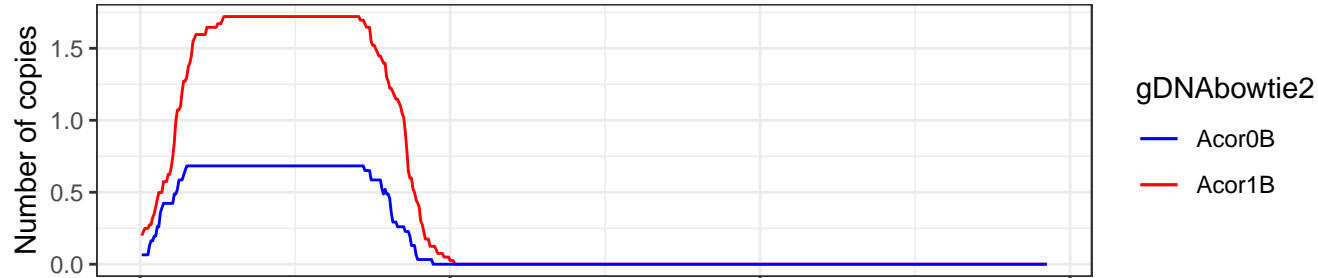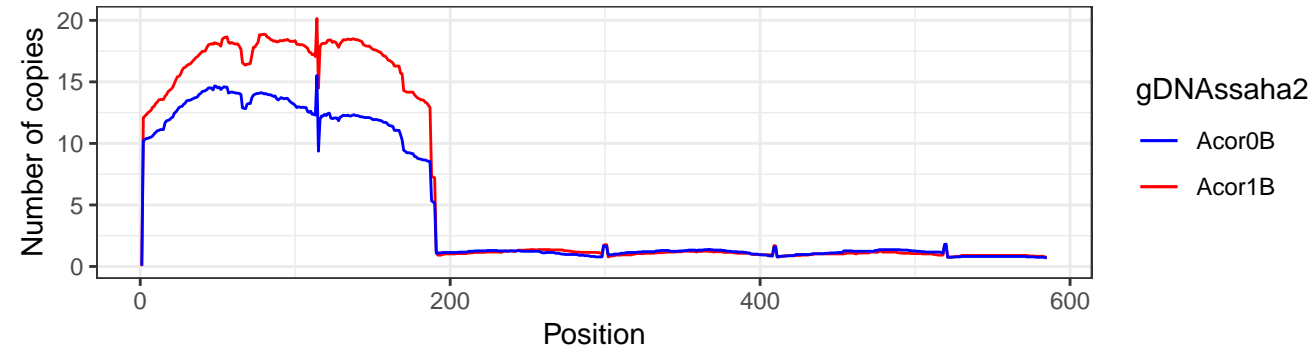

# ENA|FO204578|FO204578.1\_ARA0AAA113YL14EM1\_Irch3

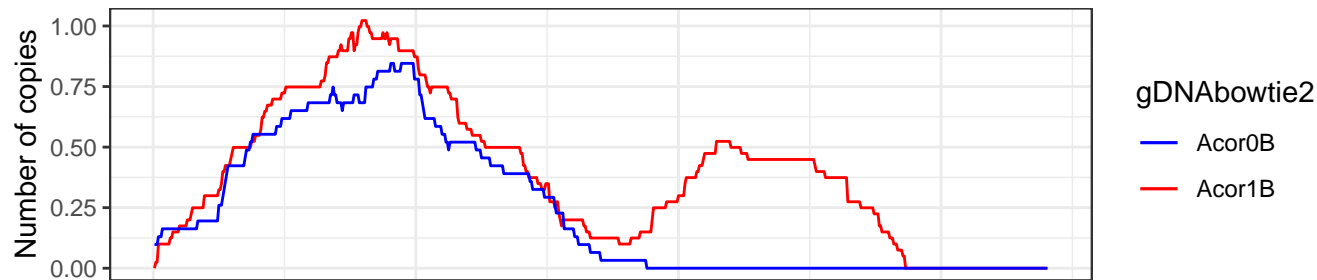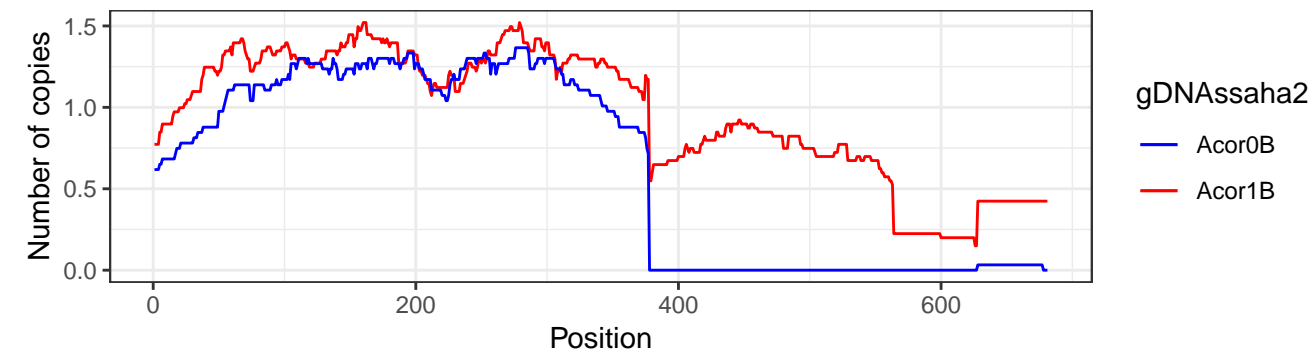

ENA|FO291596|FO291596.1\_ARA0ABA92YP02EM1\_adgrl1a

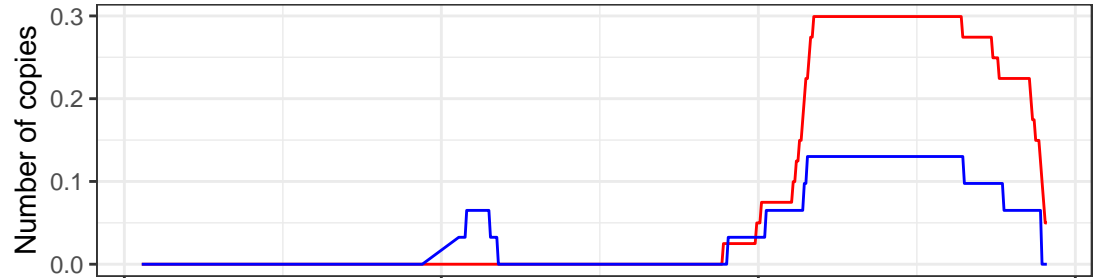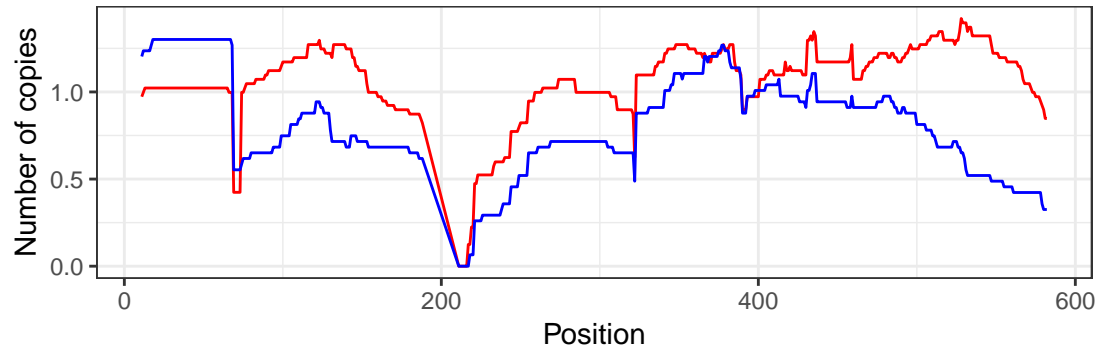

# ENA|FO245903|FO245903.1\_ARA0AAA93YP06EM1\_ufc1

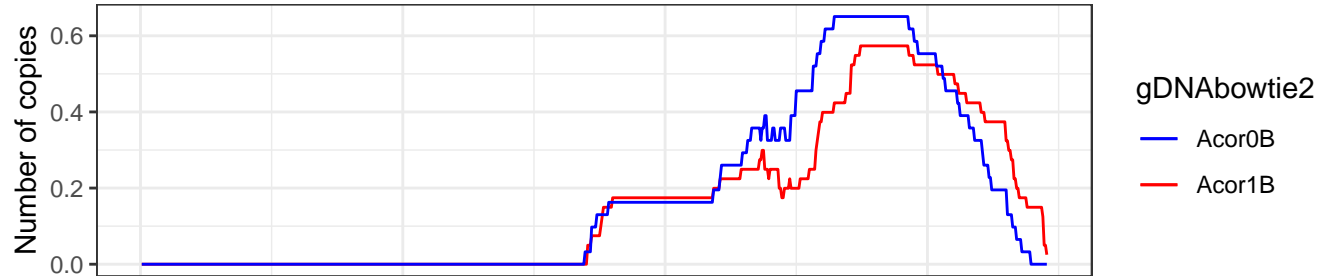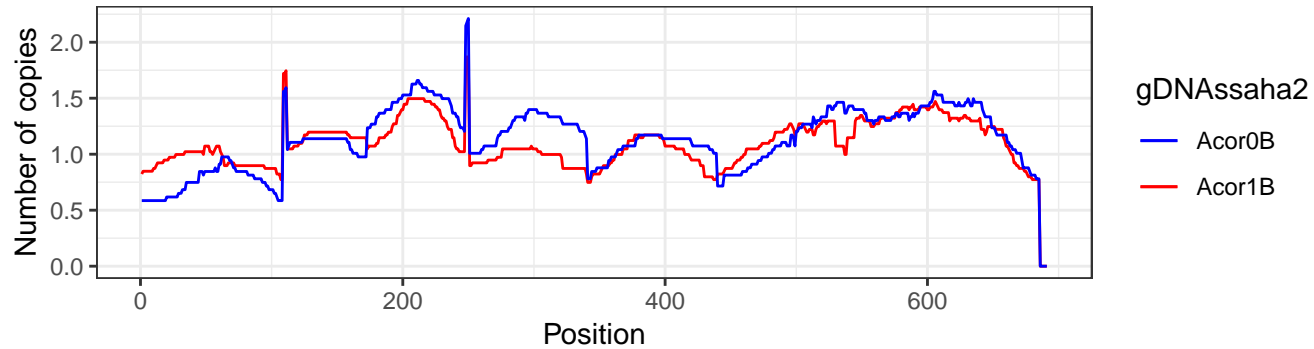

# ENA|FO226110|FO226110.1\_ARA0AAA45YM12EM2\_PKP4

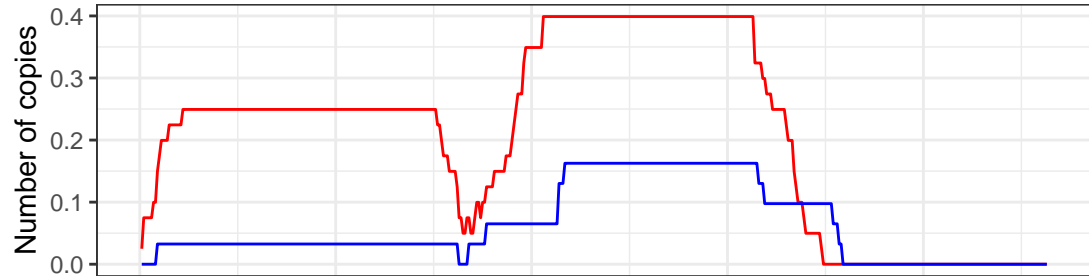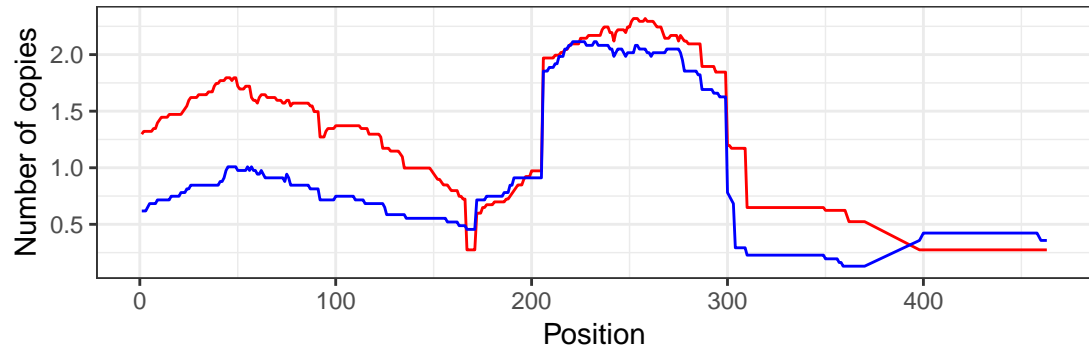

# ENA|FO220251|FO220251.1\_ARA0AAA27YO15EM1\_cnksr1

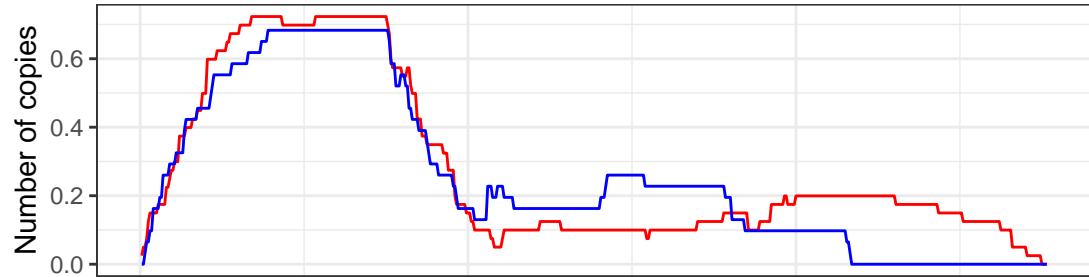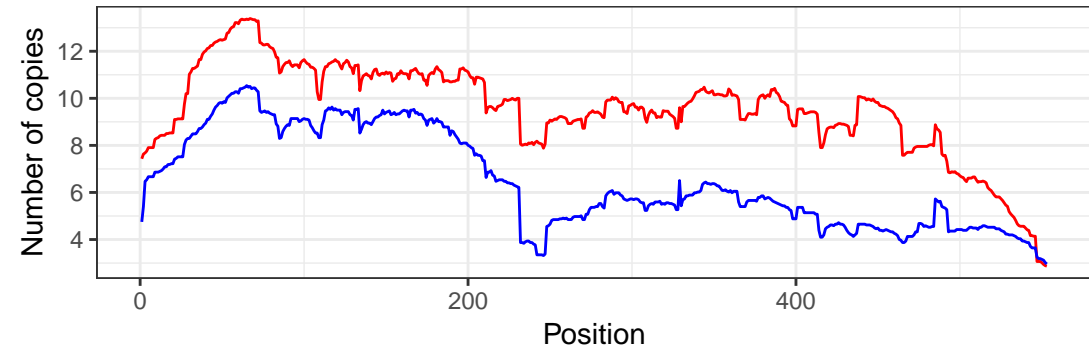



# ENA|FO239340|FO239340.1\_ARA0AAA79YB19EM1\_rhbdI3

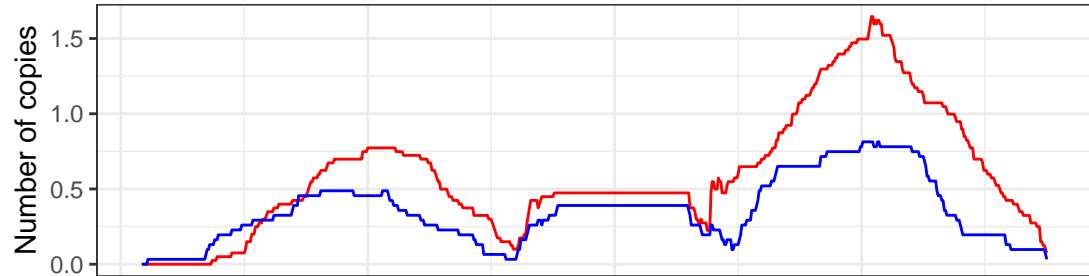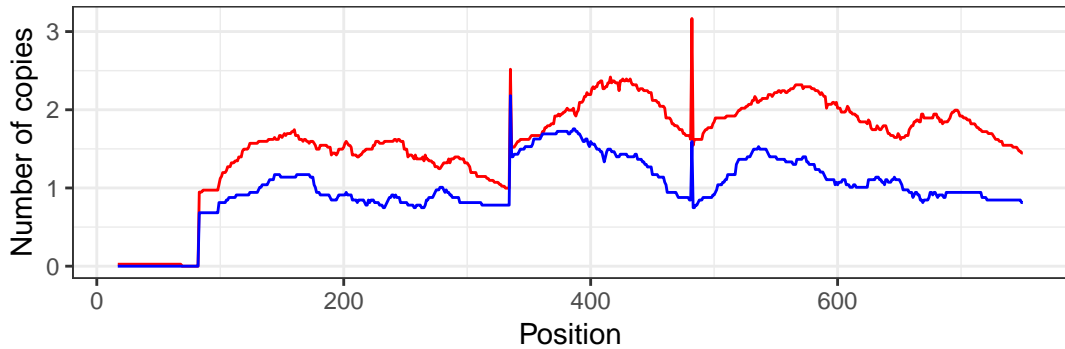

# ENA|FO210843|FO210843.1\_ARA0AAA1YJ15CM1\_pcdh2ab5

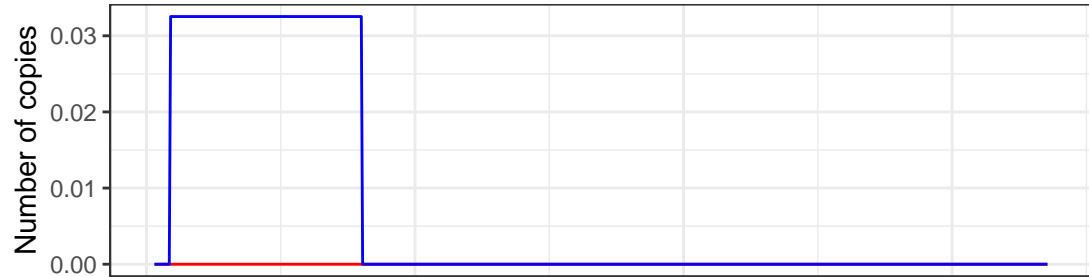

gDNA bowtie2

— Acor0B

— Acor1B

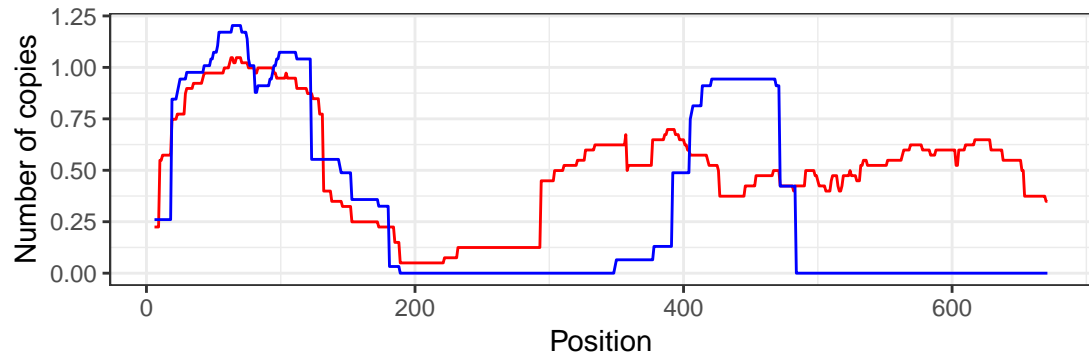

gDNA Assaha2

— Acor0B

— Acor1B

# ENA|FO334161|FO334161.1\_ARA0AEA35YF10EM1\_tldc1

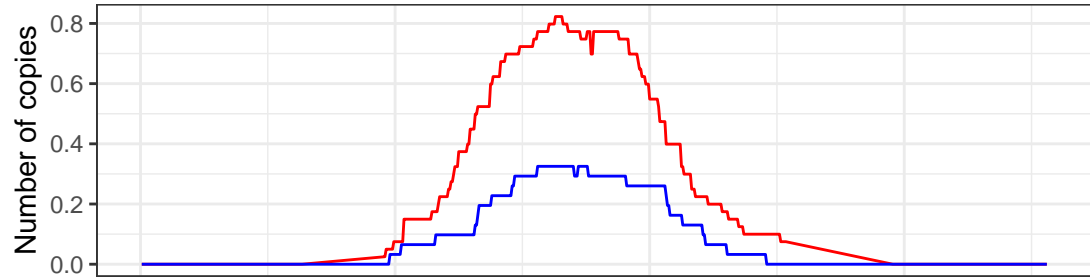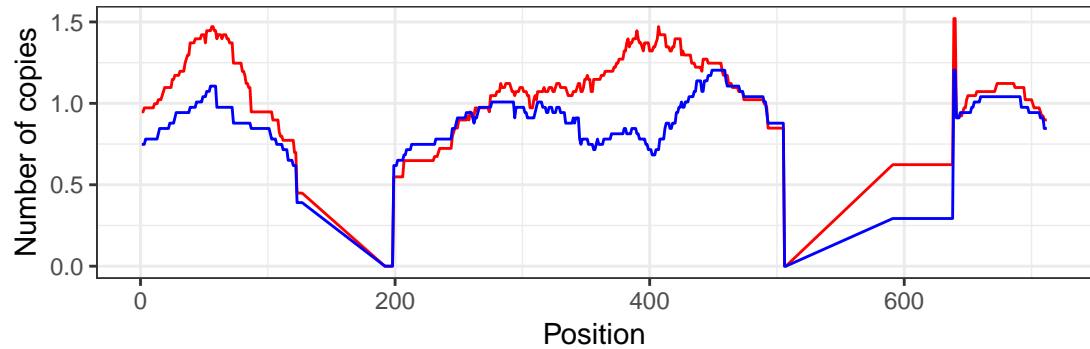

# ENA|FO234622|FO234622.1\_ARA0AAA59YE17EM1\_entpd8

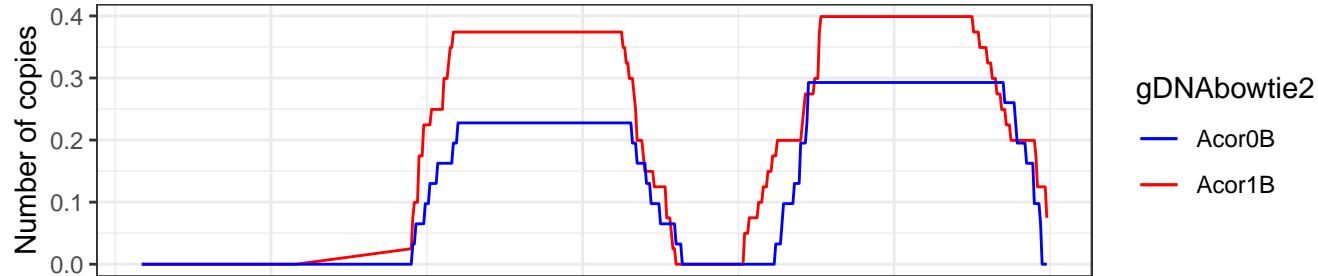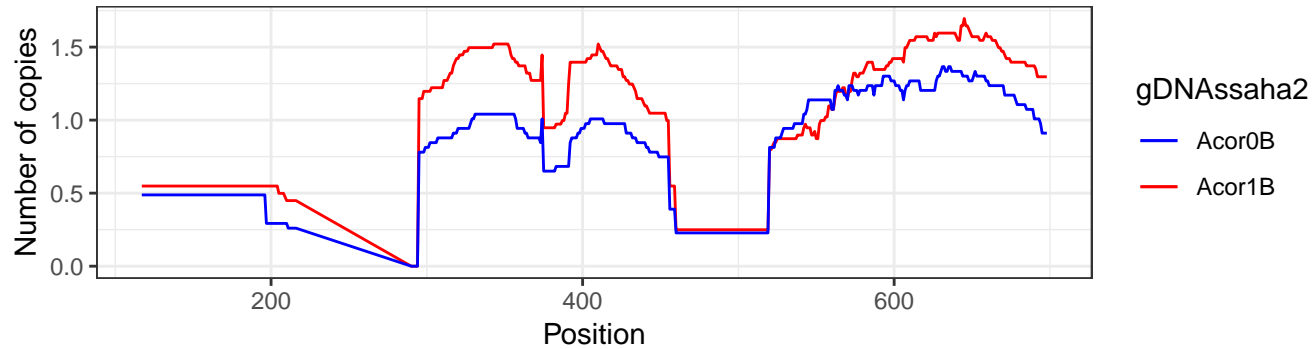

# ENA|FO253080|FO253080.1\_ARA0ABA107YN23EM1\_recqI4

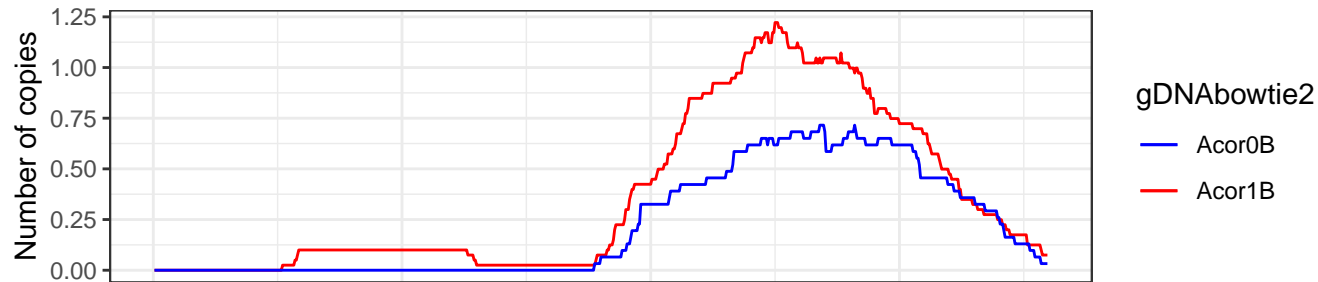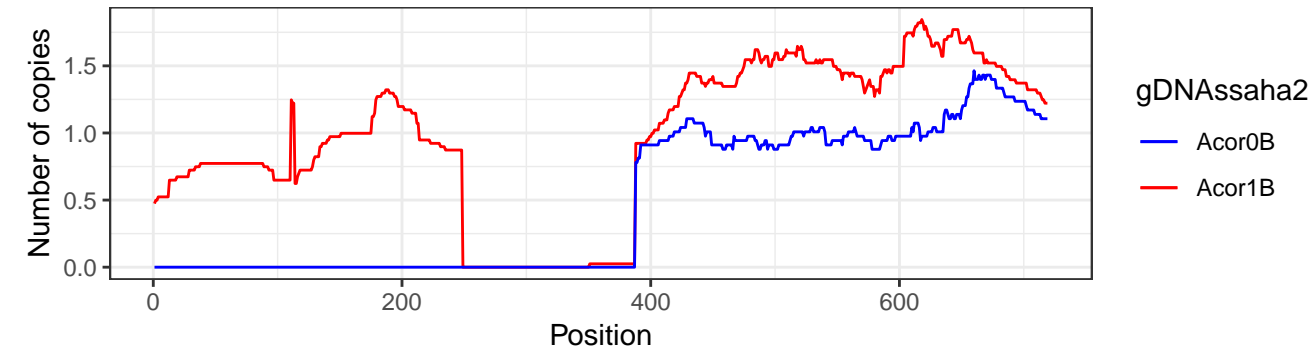

# ENA|FO209591|FO209591.1\_ARA0AAA100YM07EM1\_myt1b

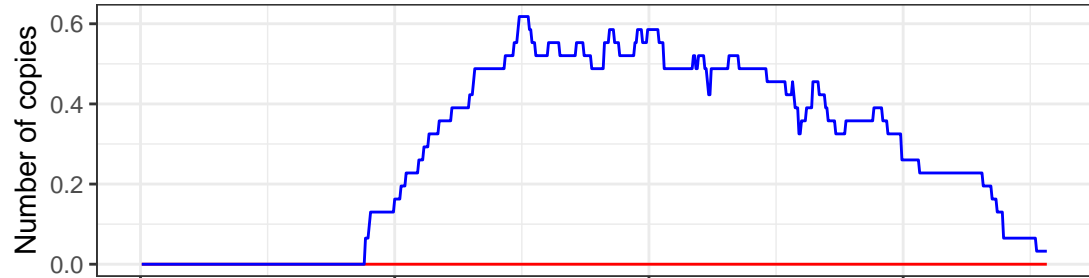

gDNA bowtie2

Acor0B

Acor1B

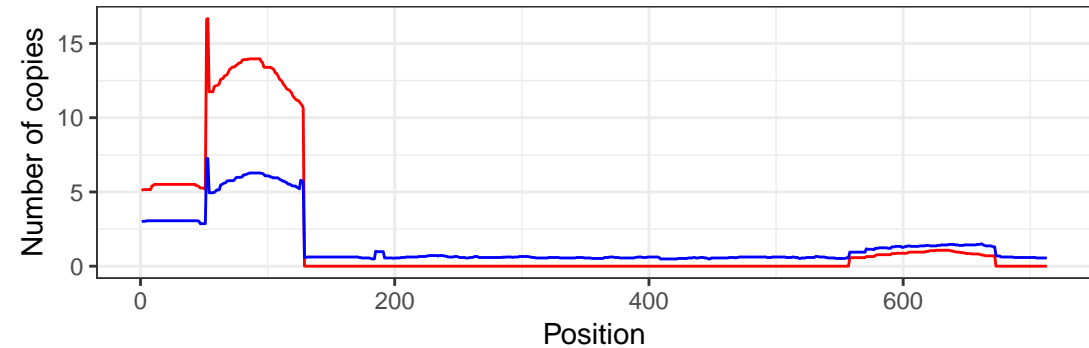

gDNA Assaha2

Acor0B

Acor1B

# ENA|FO221079|FO221079.1\_ARA0AAA25YJ15EM1\_spag8

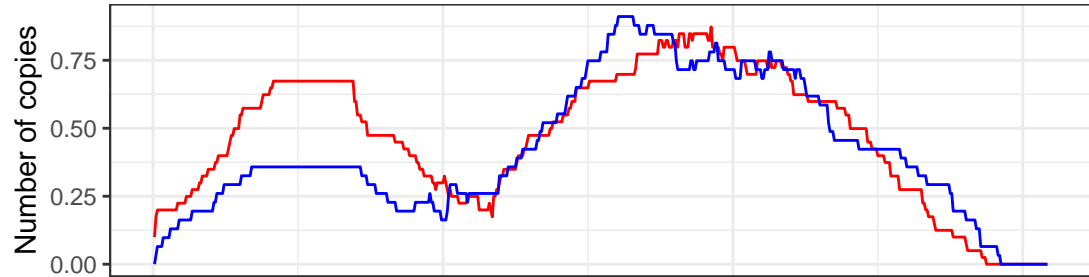

gDNA bowtie2

Acor0B

Acor1B

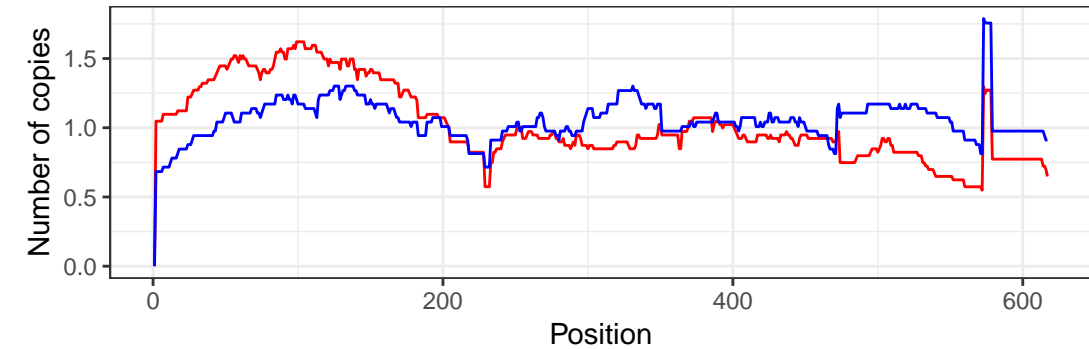

gDNA Assaha2

Acor0B

Acor1B

# ENA|FO224455|FO224455.1\_ARA0AAA52YG22EM1\_ndufv1

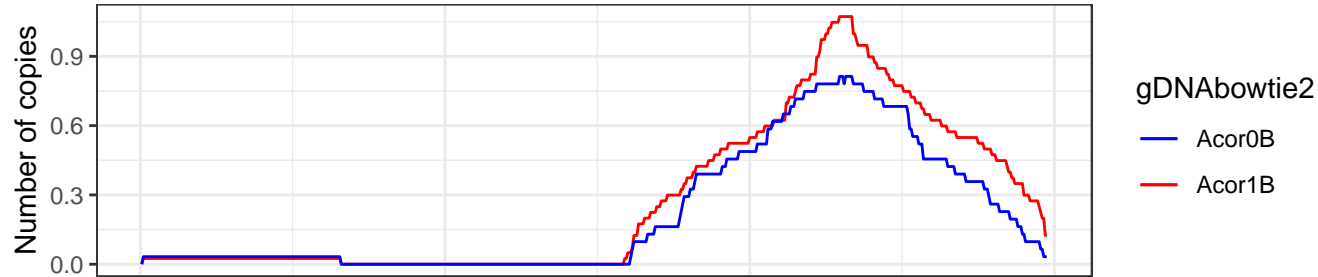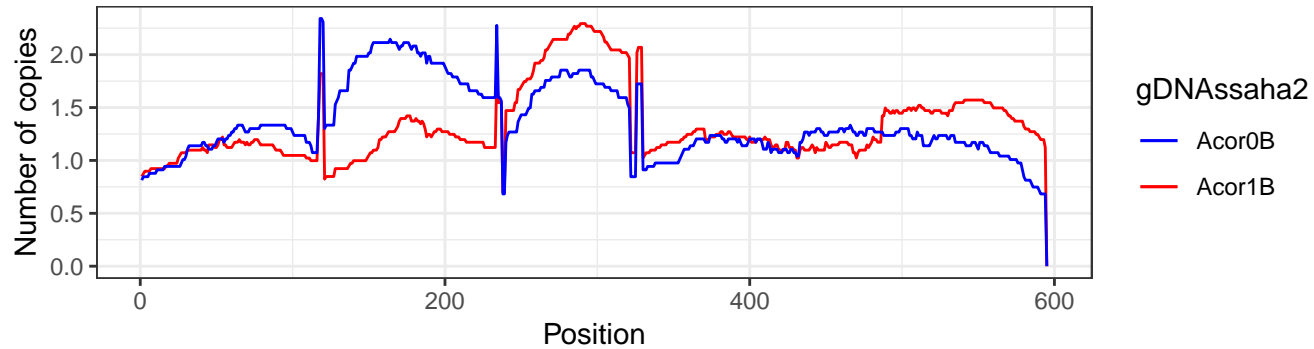



# ENA|FO222807|FO222807.1\_ARA0AAA57YA06EM1\_hoxb2a

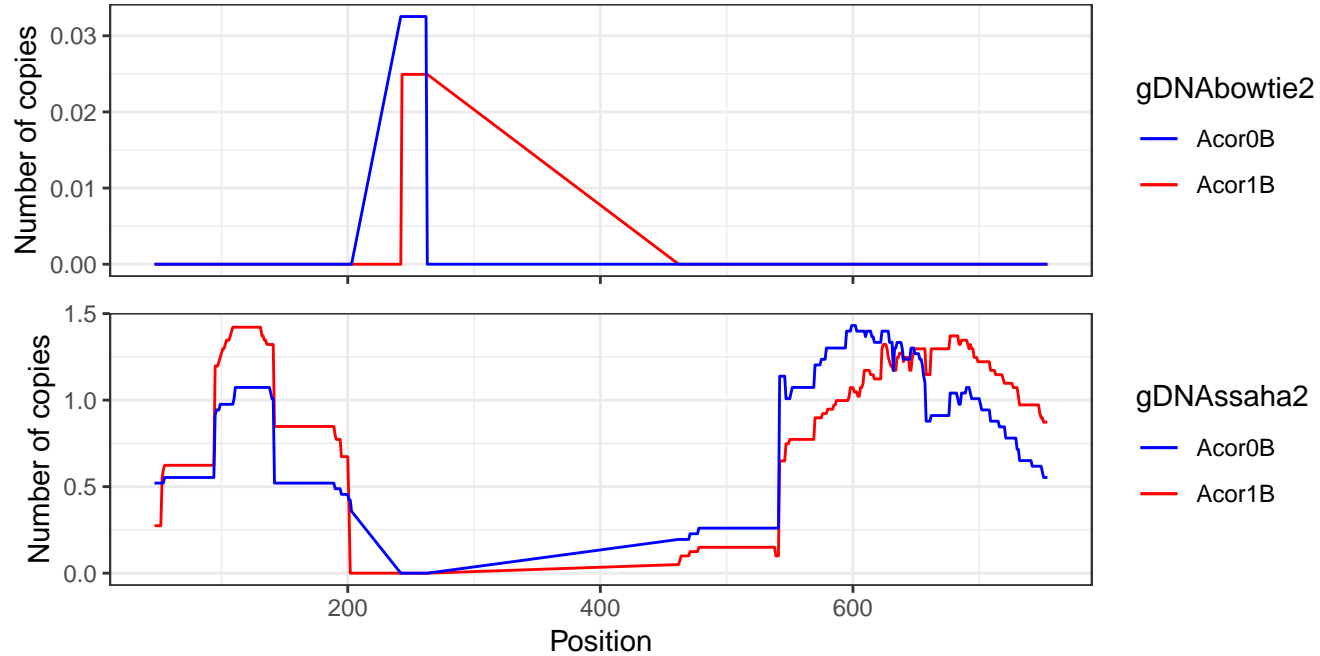

ENA|FO219036|FO219036.1\_ARA0AAA30YF06EM2\_rxylt1

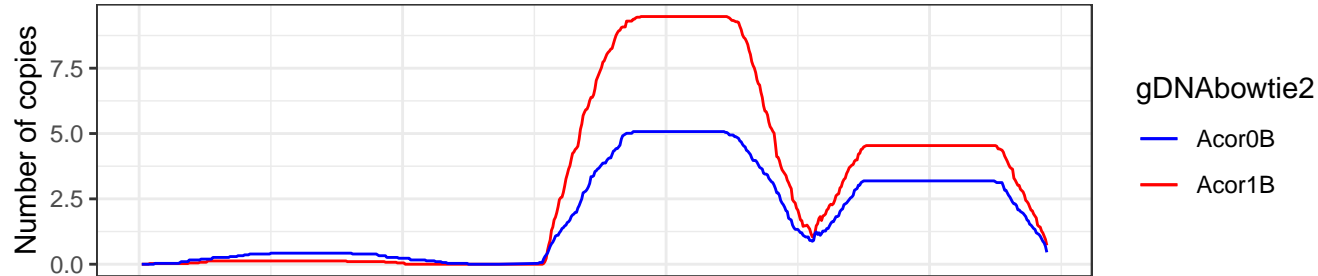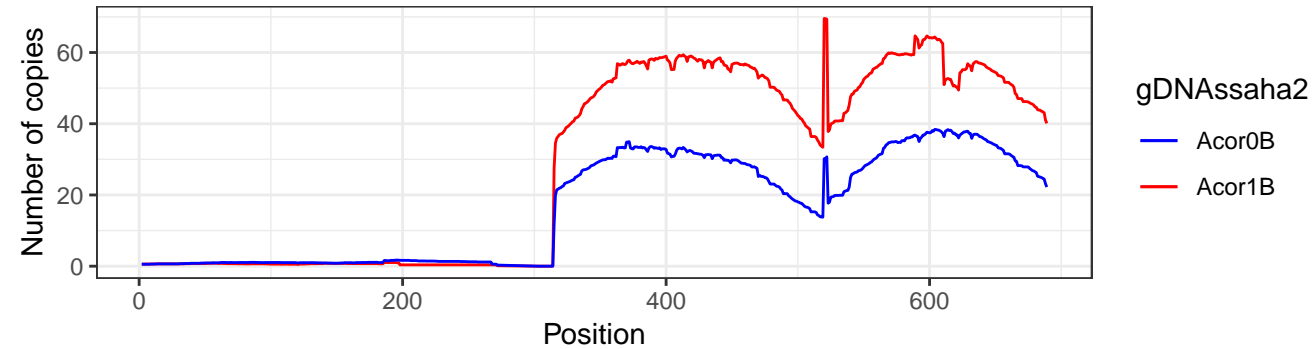

# ENA|FO230775|FO230775.1\_ARA0AAA68YL16EM1\_cdk12

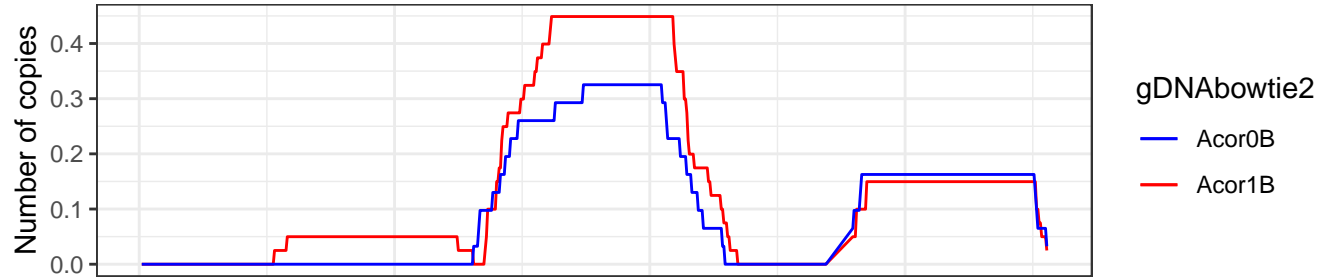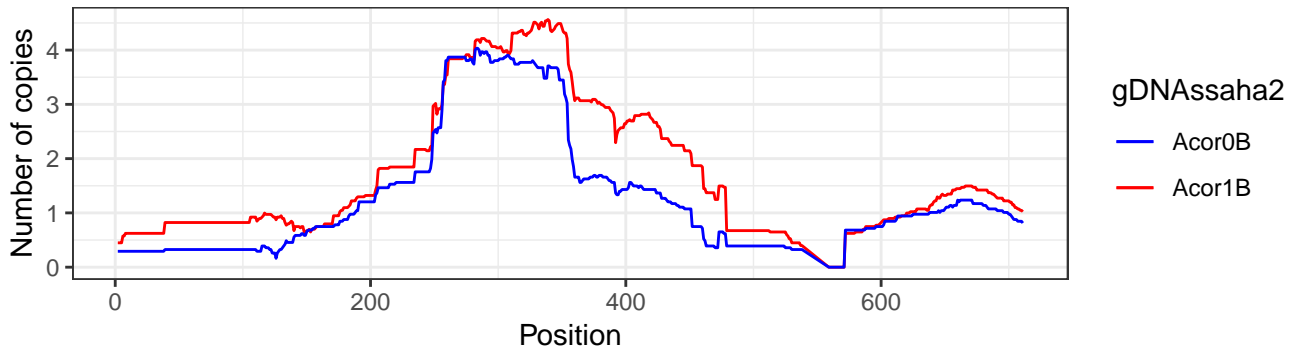

# ENA|FO206192|FO206192.1\_ARA0AAA10YF03EM1\_srp9

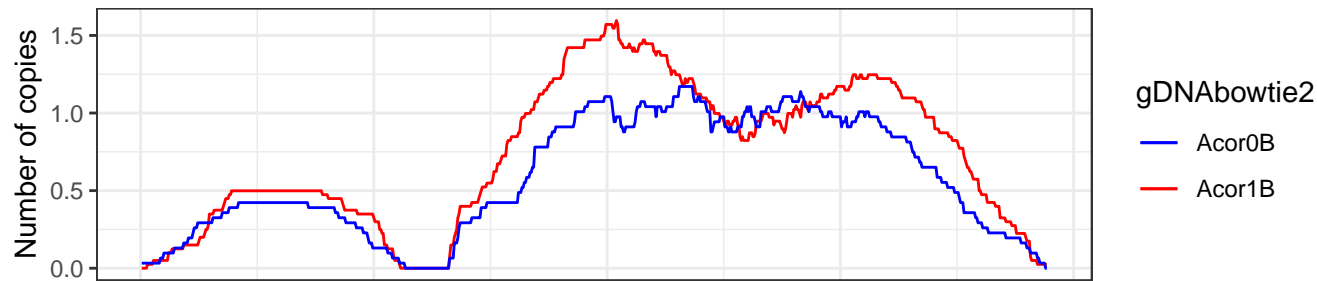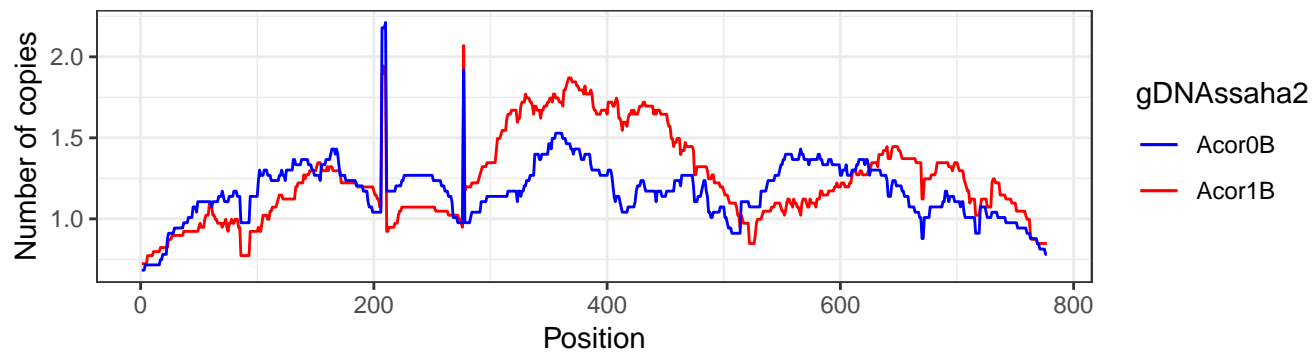

# ENA|FO380471|FO380471.1\_ARA0AGA7YP20EM1\_arpc1a

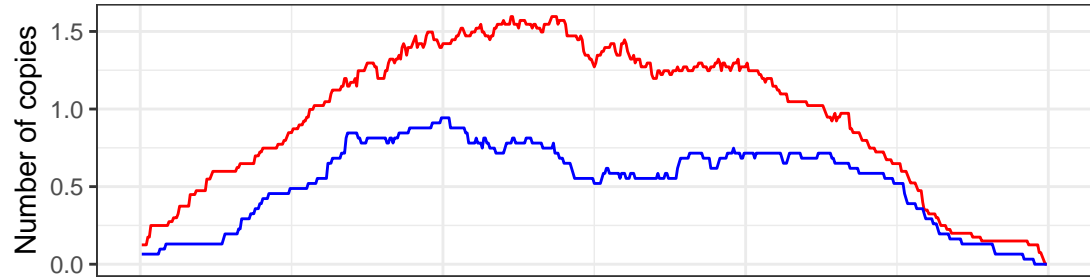

gDNA bowtie2

— Acor0B

— Acor1B

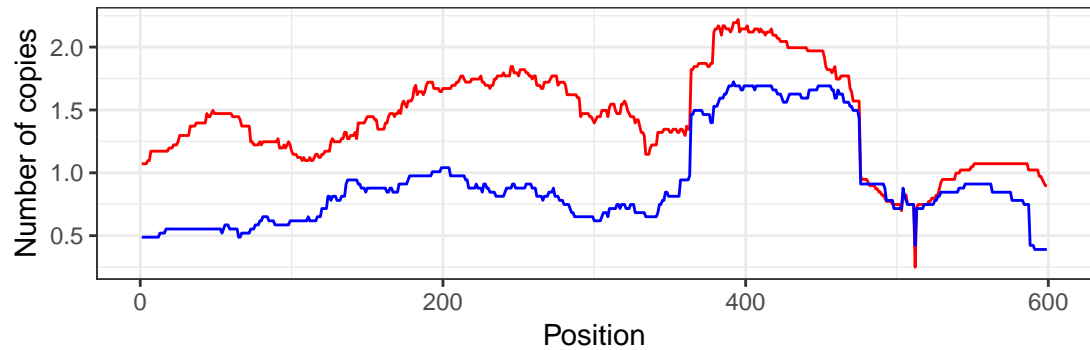

gDNA Assaha2

— Acor0B

— Acor1B

# ENA|FO212494|FO212494.1\_ARA0AAA16YP03EM1\_fibpb

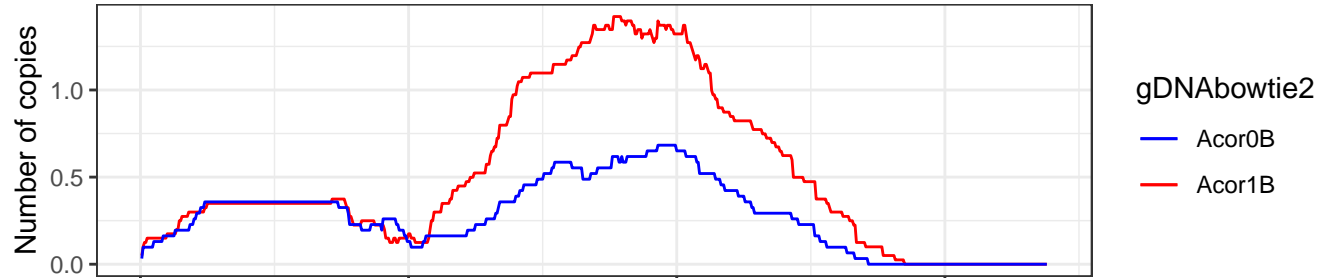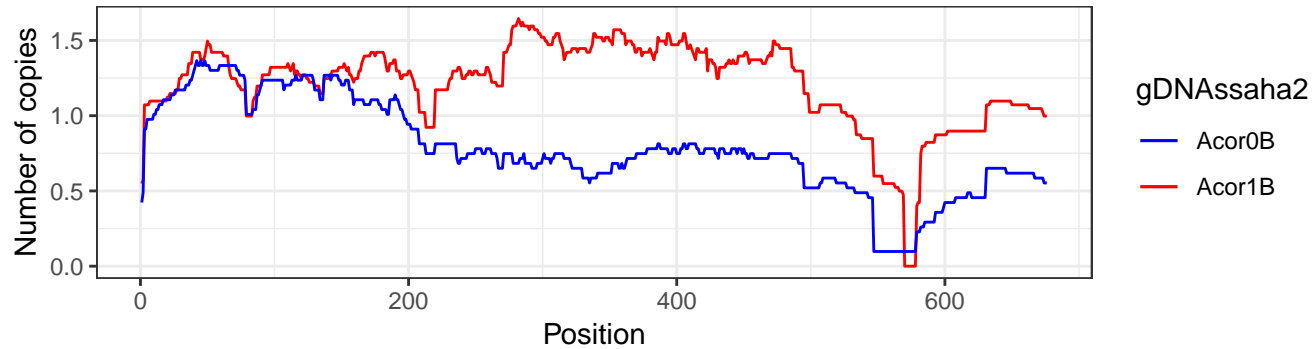

# ENA|FO360918|FO360918.1\_ARA0AFA6YJ23EM1\_slain1a

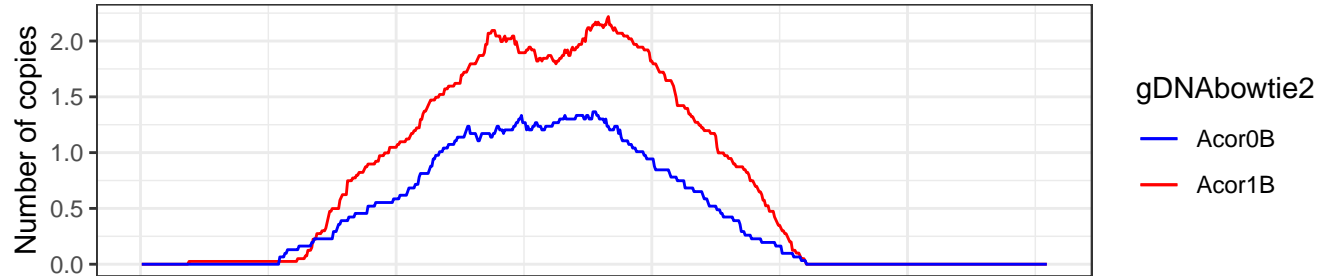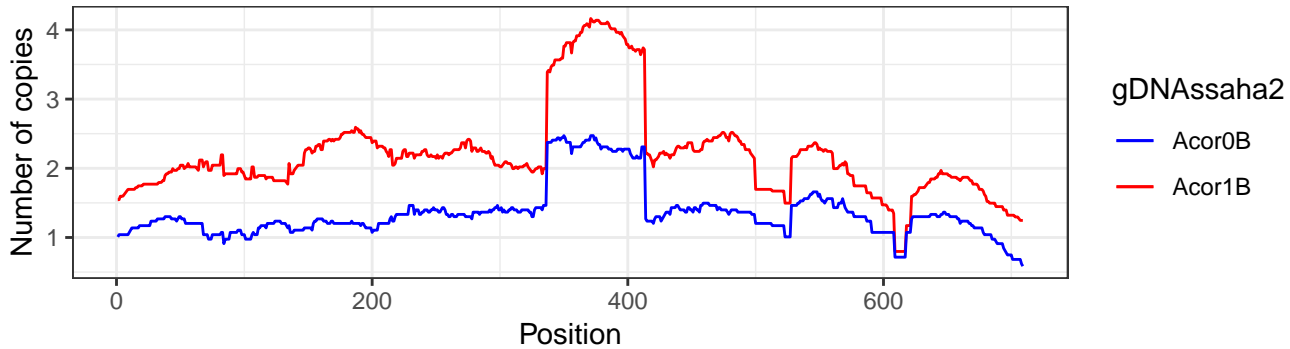

# ENA|FO219266|FO219266.1\_ARA0AAA2YL01EM1\_rasal2

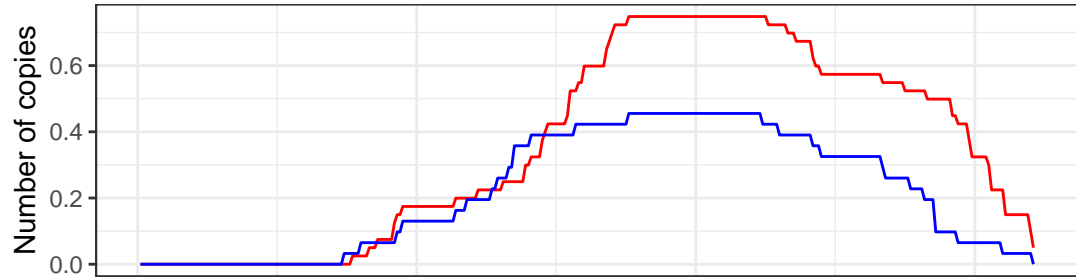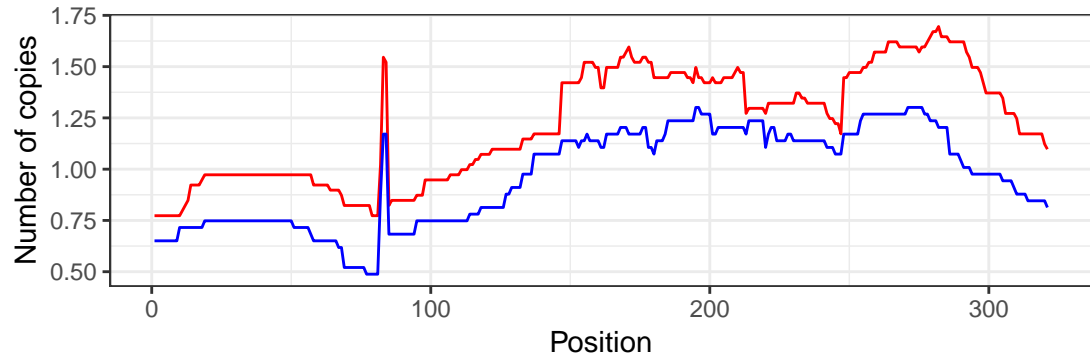



# ENA|FO227165|FO227165.1\_ARA0AAA42YK17EM1\_sntb1

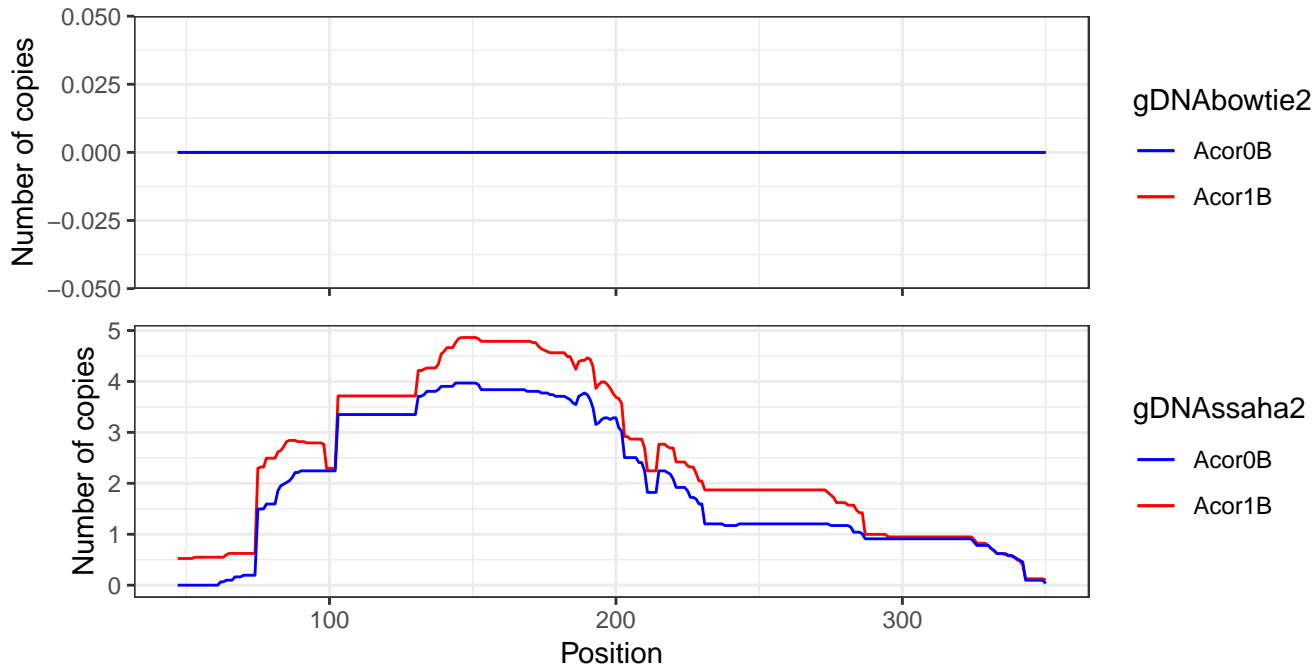

# ENA|FO262416|FO262416.1\_ARA0ABA39YB05EM1\_heph11b

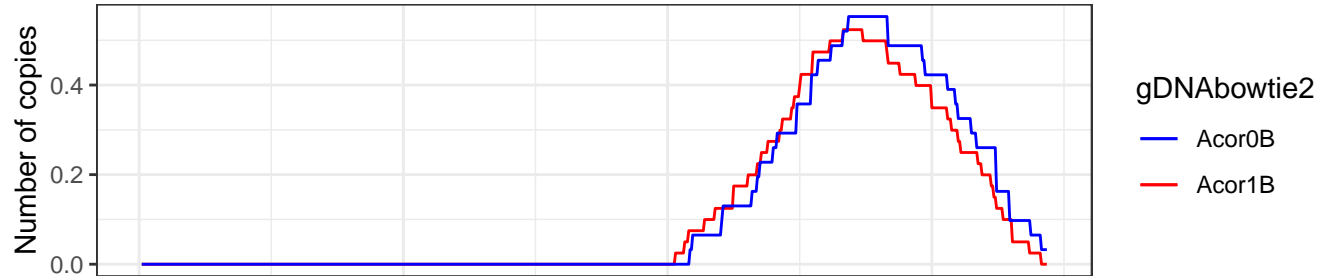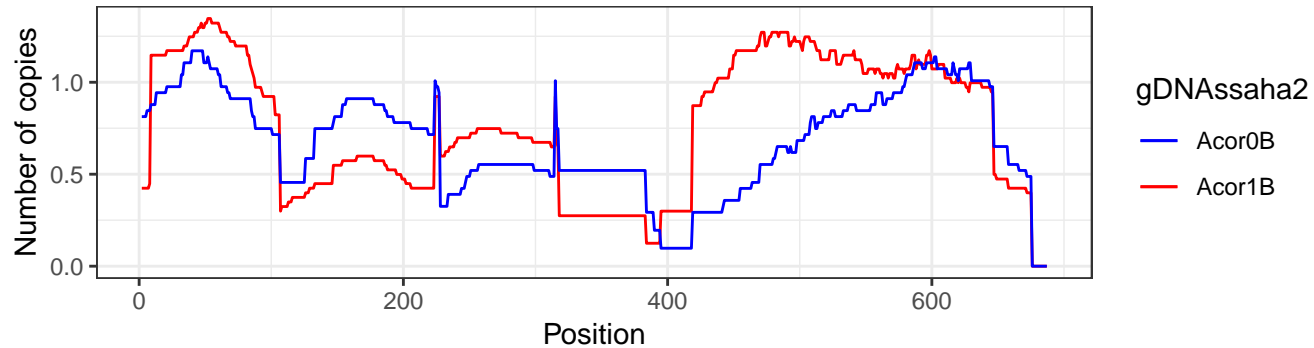

# ENA|FO263276|FO263276.1\_ARA0ABA36YL10EM1\_stk38b

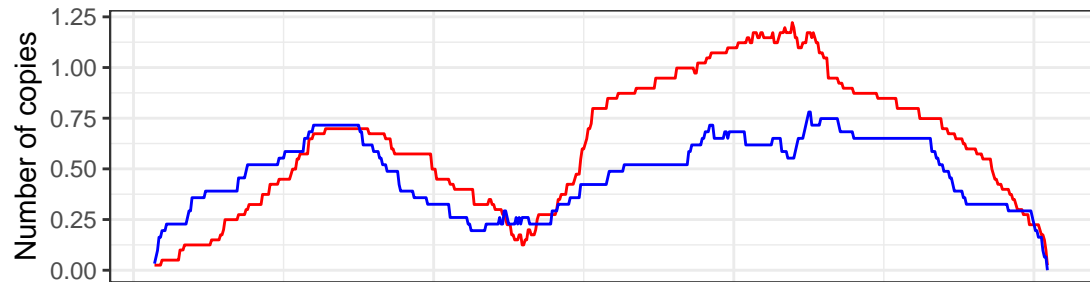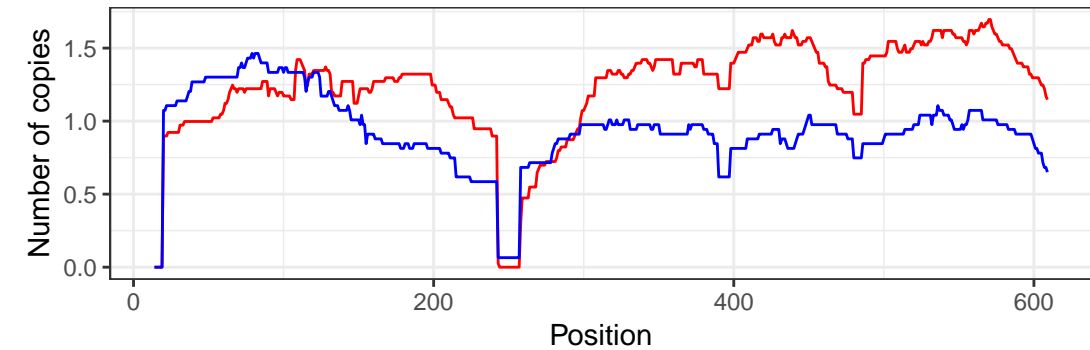

# ENA|FO274509|FO274509.1\_ARA0ABA72YE03EM1\_or137-7

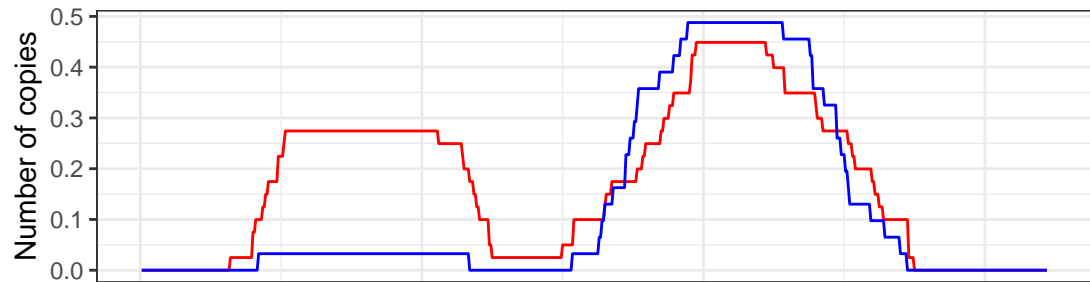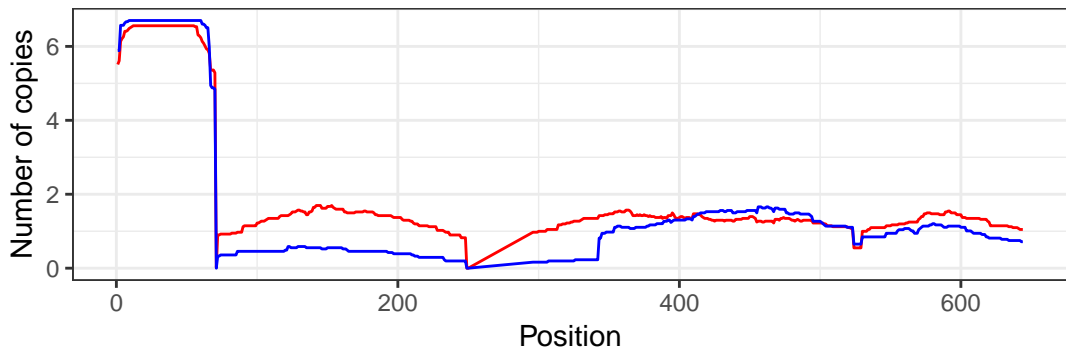

# ENA|FO269364|FO269364.1\_ARA0ABA53YA22EM1\_hnf1ba

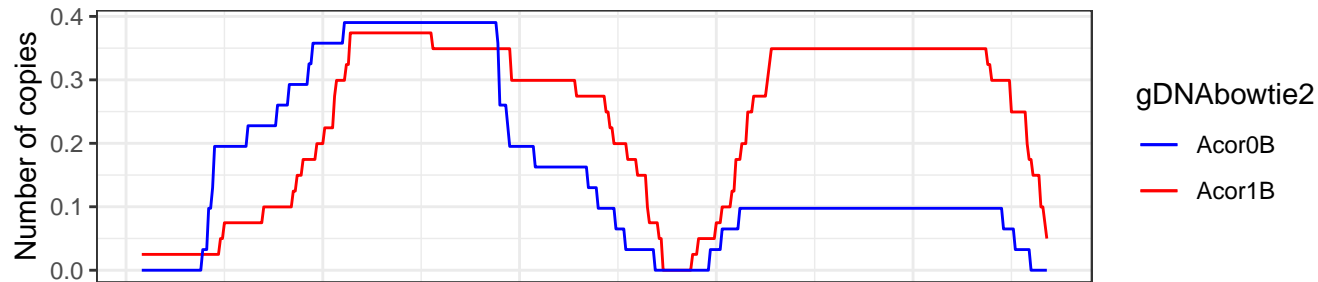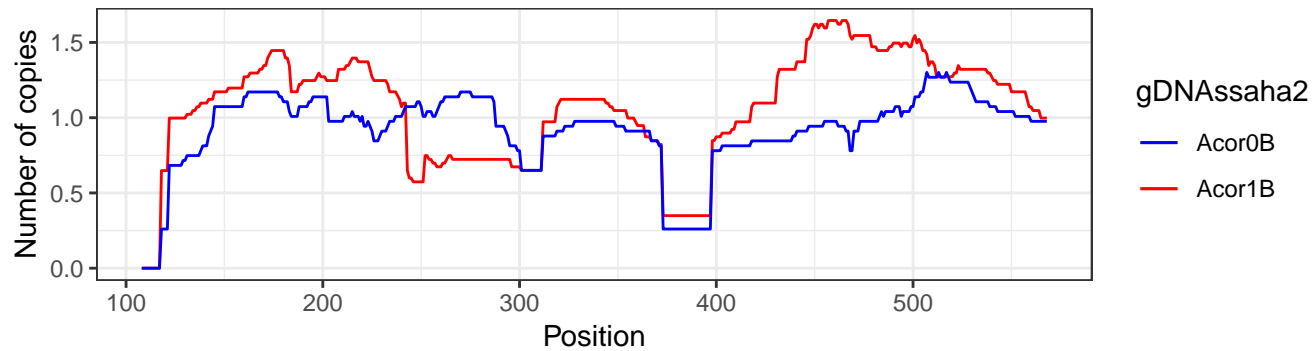

# ENA|FO355591|FO355591.1\_ARA0AGA20YE23EM1\_si

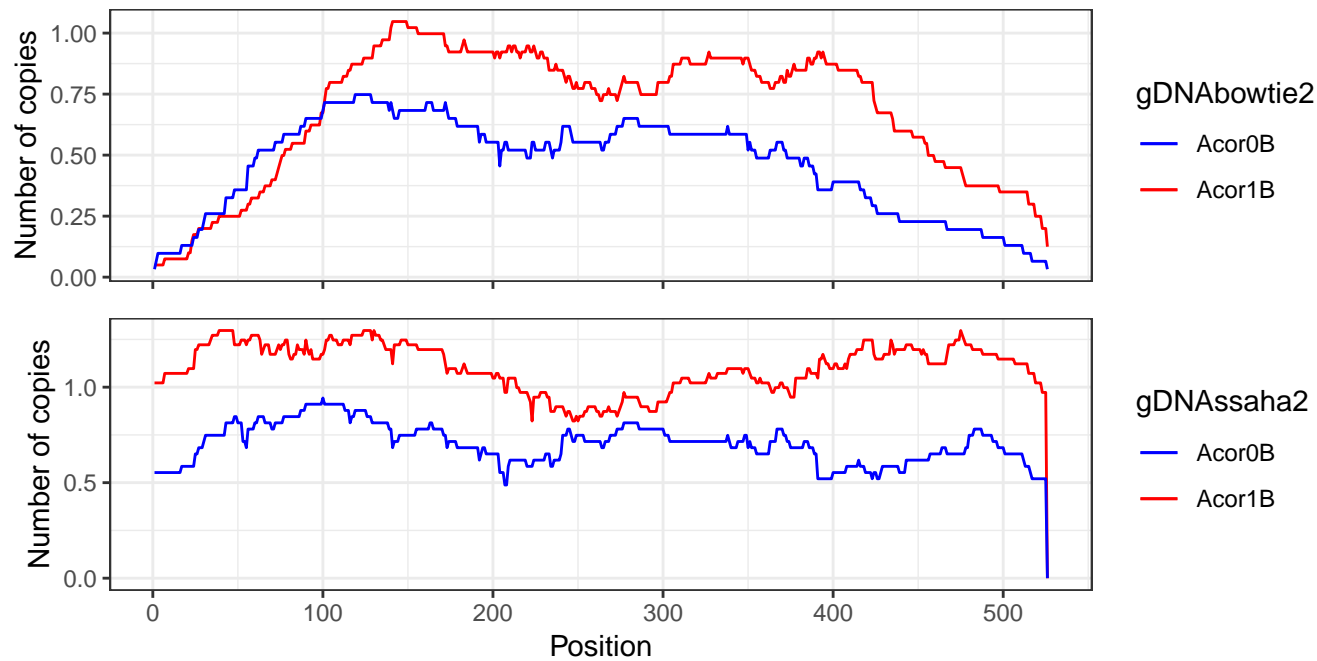

# ENA|FO230127|FO230127.1\_ARA0AAA6YI09EM1\_mfge8b

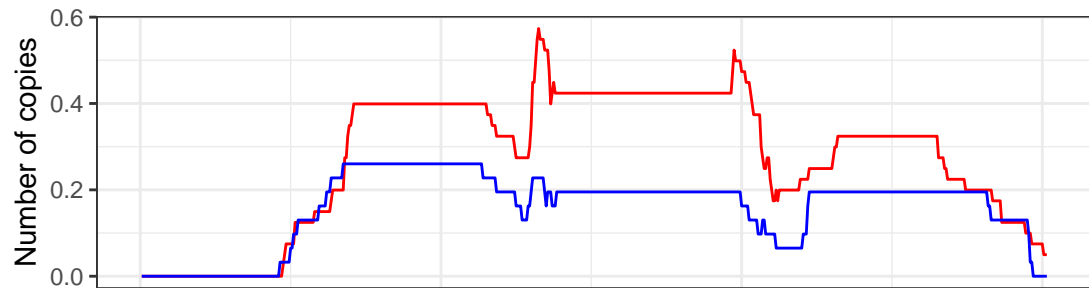

gDNA bowtie2

Acor0B

Acor1B

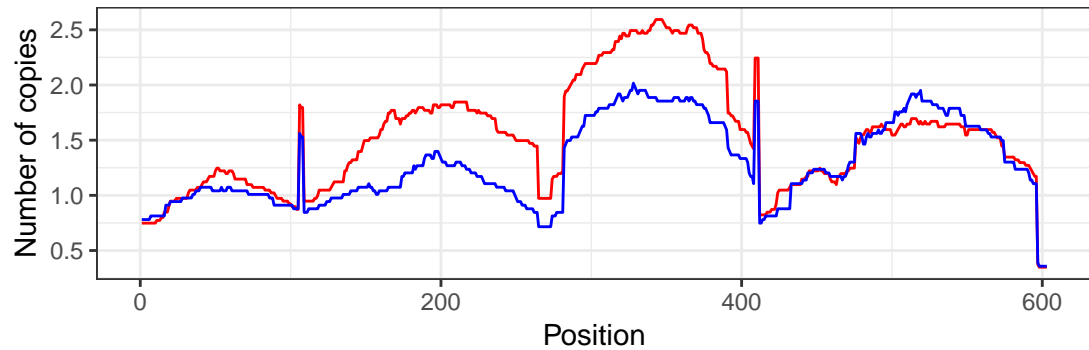

gDNA Assaha2

Acor0B

Acor1B

# ENA|FO282399|FO282399.1\_ARA0ABA84YI10EM1\_emilin3a

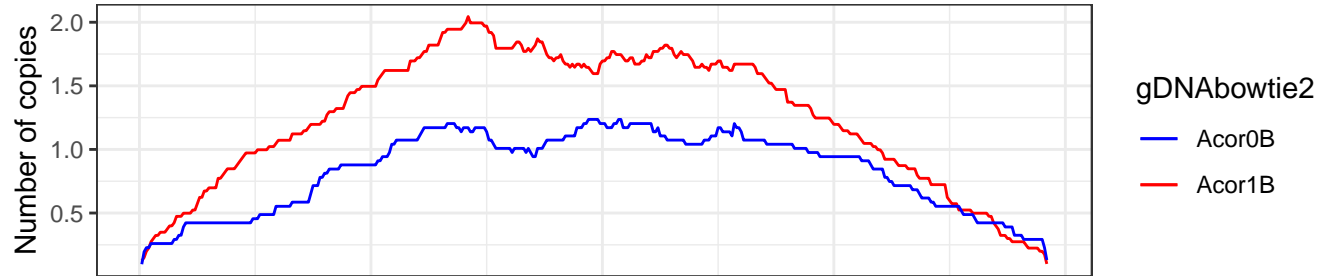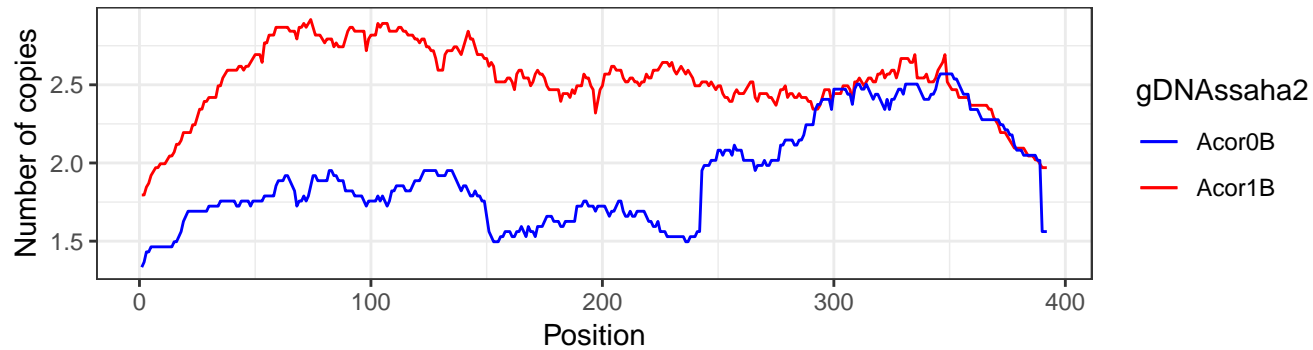



# ENA|FO207240|FO207240.1\_ARA0AAA107YG14EM1\_chsy3

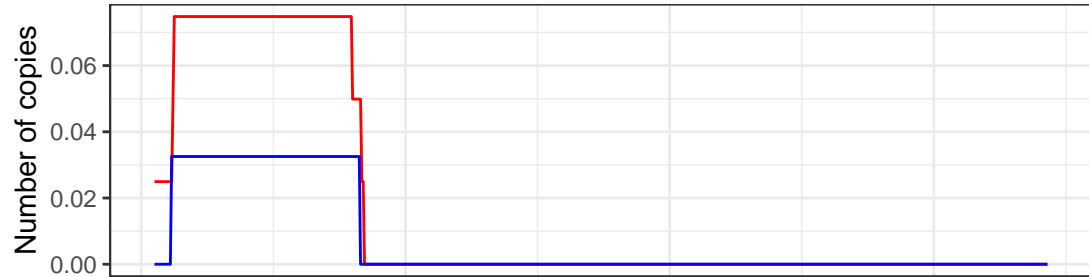

gDNA bowtie2

Acor0B

Acor1B

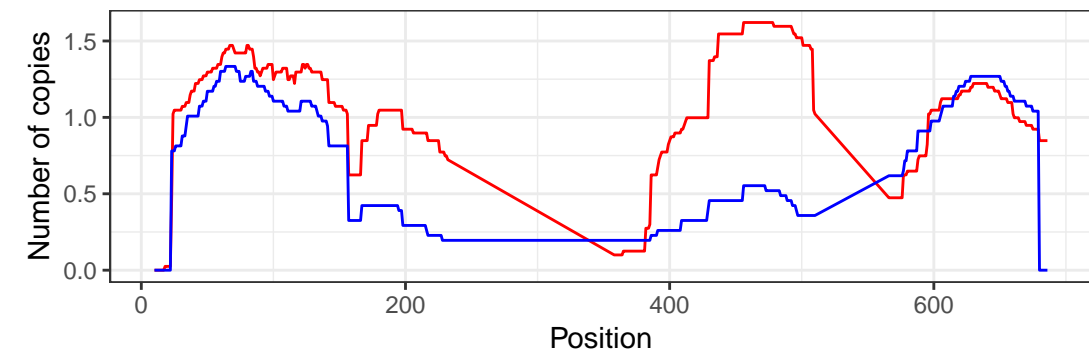

gDNA Assaha2

Acor0B

Acor1B

# ENA|FO287922|FO287922.1\_ARA0ACA12YC18EM1\_macrocl1

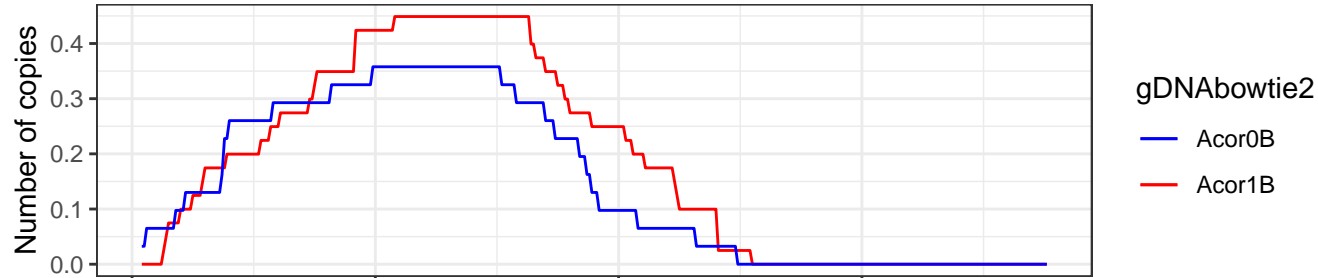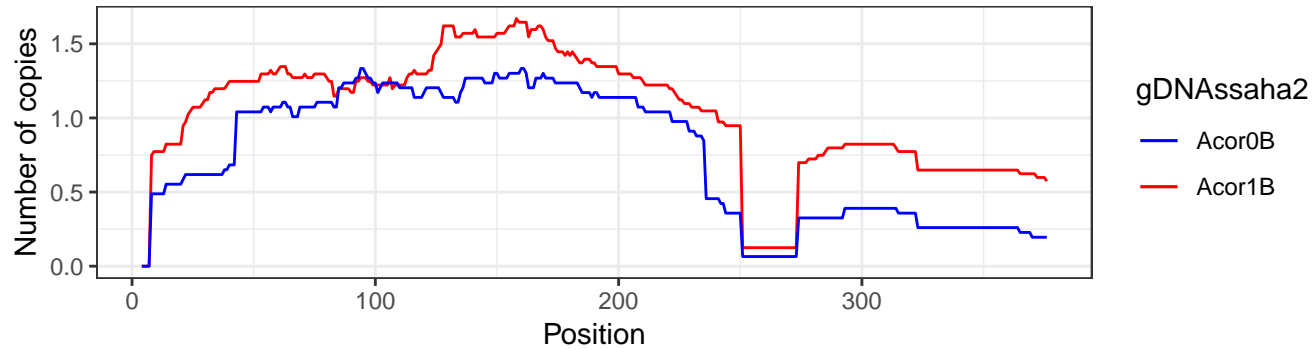

# ENA|FO219358|FO219358.1\_ARA0AAA2YG22EM1\_itgam

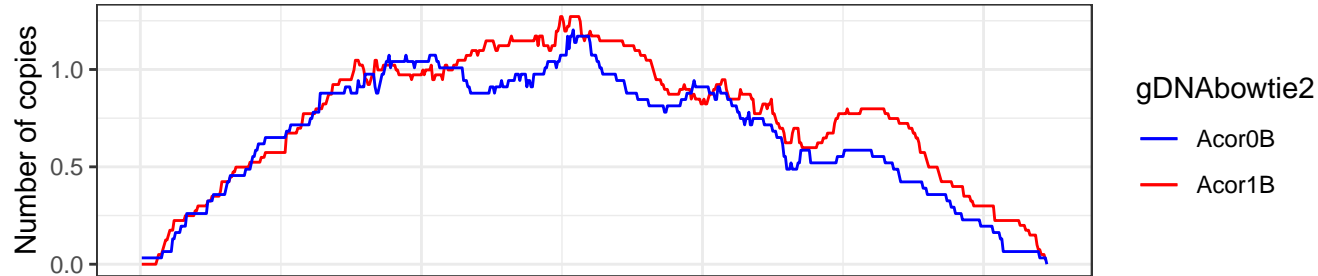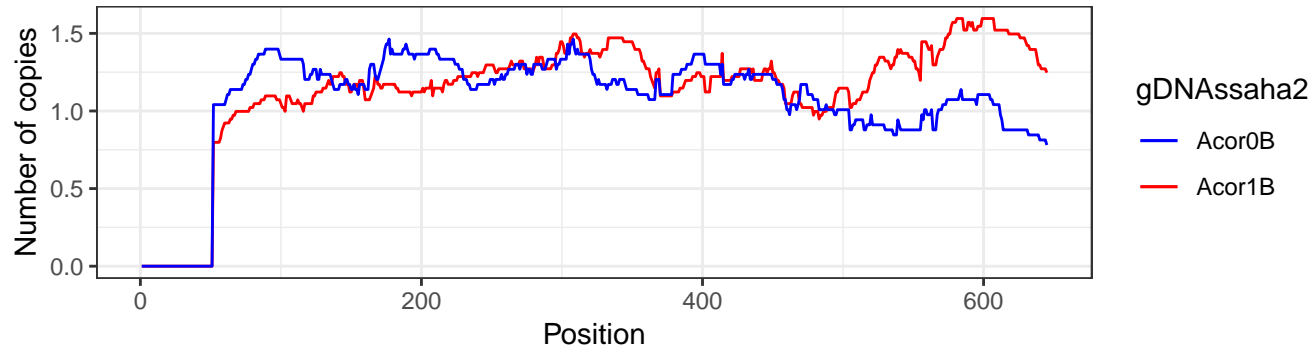

# ENA|FO228649|FO228649.1\_ARA0AAA39YG10EM1\_si

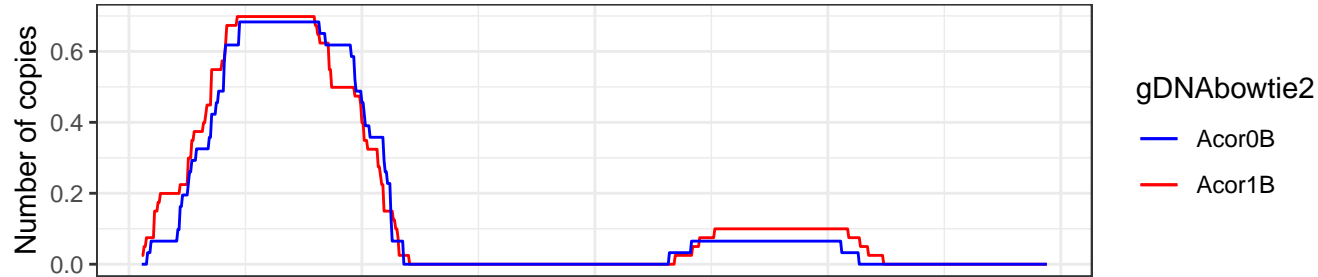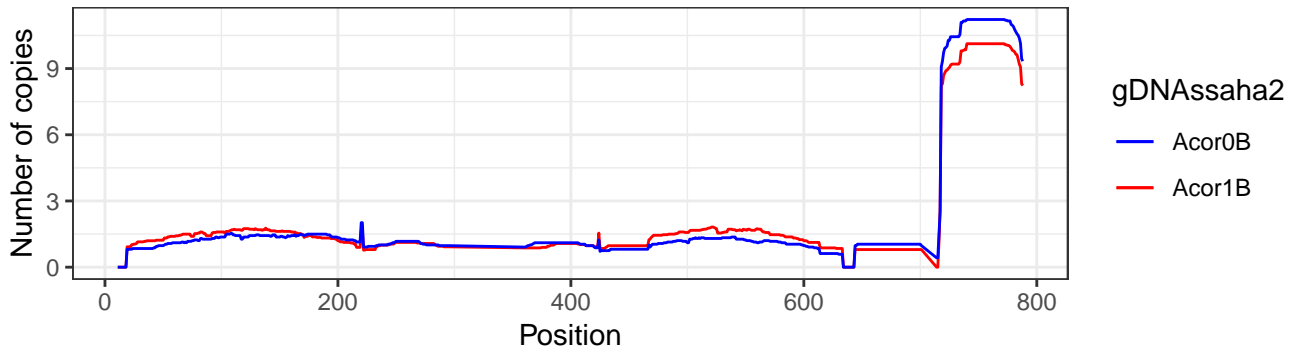

# ENA|FO212291|FO212291.1\_ARA0AAA17YI05EM1\_pcdh1g31

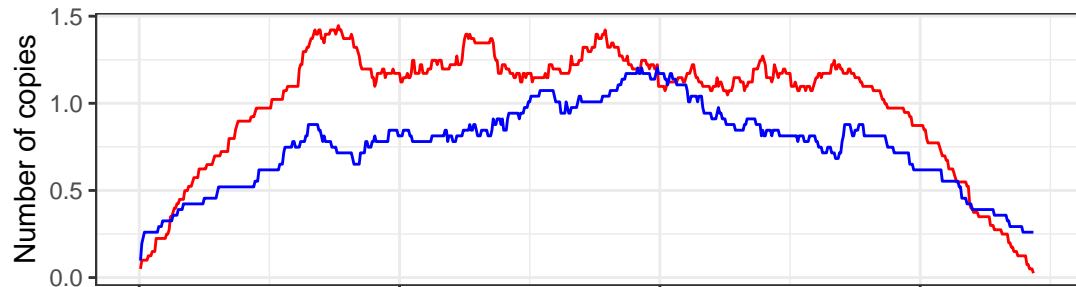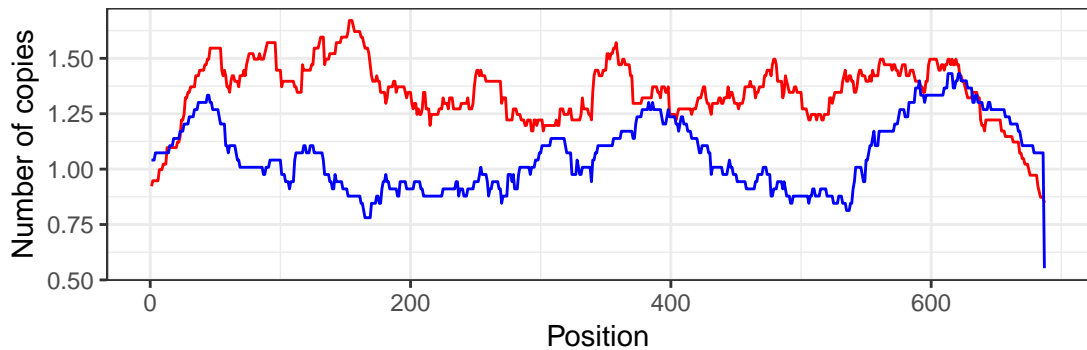

Supplement: 12864_2023_9883_MOESM5_ESM.pdf [file 12864_2023_9883_MOESM5_ESM.pdf]
